# Supplementary material for: Ancient European dog genomes reveal continuity since the Early Neolithic
Source: PubMed Central journal article supplement (PMC5520058; doi:10.1038/ncomms16082), 2017-07-18
Supplement: ncomms16082-s1.pdf [file ncomms16082-s1.pdf]

# SI GUIDE

File Name: Supplementary Information

File Description: Supplementary Figures, Supplementary Tables, Supplementary Notes and Supplementary References.

File Name: Peer Review File

File Description:

1 **Supplementary Figure 1**

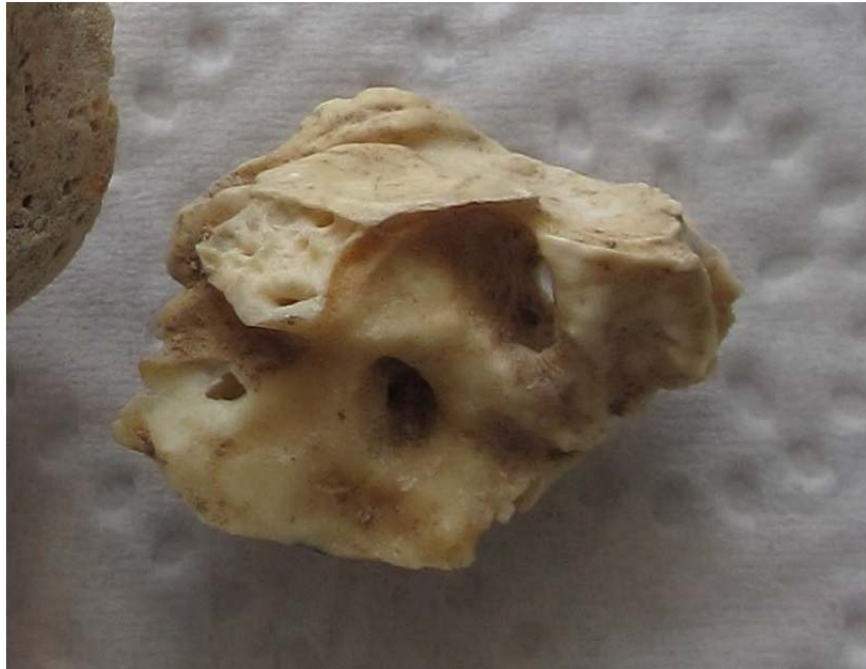

2  
3 **Supplementary Figure 1: HXH petrous bone**

4  
5  
6  
7  
8  
9  
10  
11  
12  
13  
14  
15  
16  
17  
18  
19  
20  
21  
22  
23  
24  
25  
26  
27  
28

29 **Supplementary Figure 2**  
30  
31

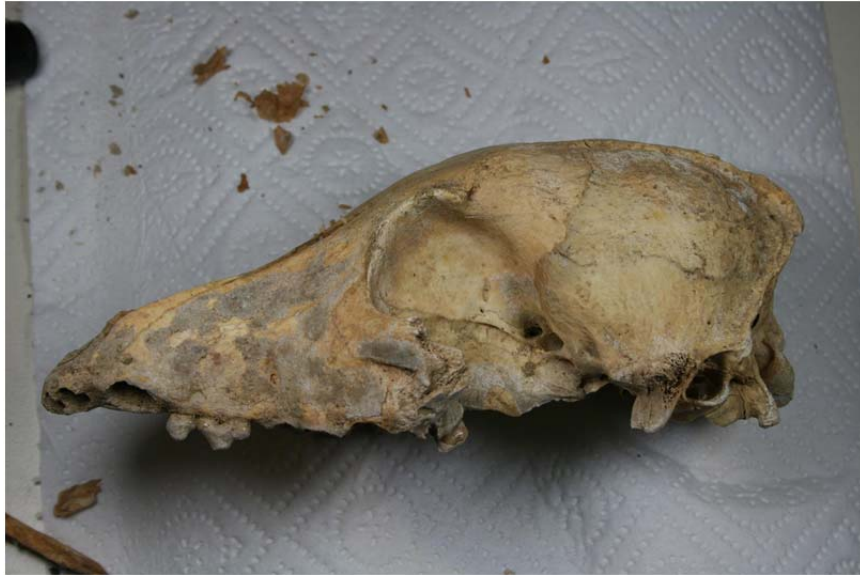

32  
33 **Supplementary Figure 2: CTC cranium.**

34  
35  
36  
37  
38  
39  
40  
41  
42  
43  
44  
45  
46  
47  
48  
49  
50  
51  
52  
53  
54  
55  
56  
57  
58  
59  
60

61 **Supplementary Figure 3**  
62  
63 **A**

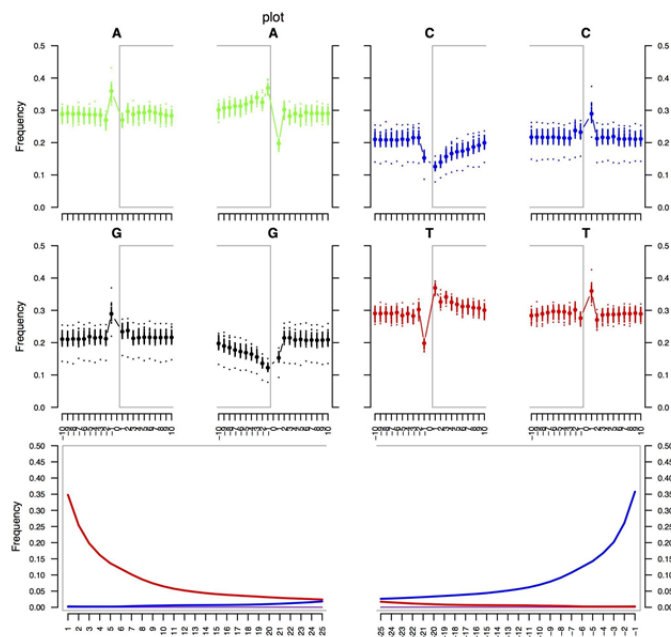

64  
65 **B**

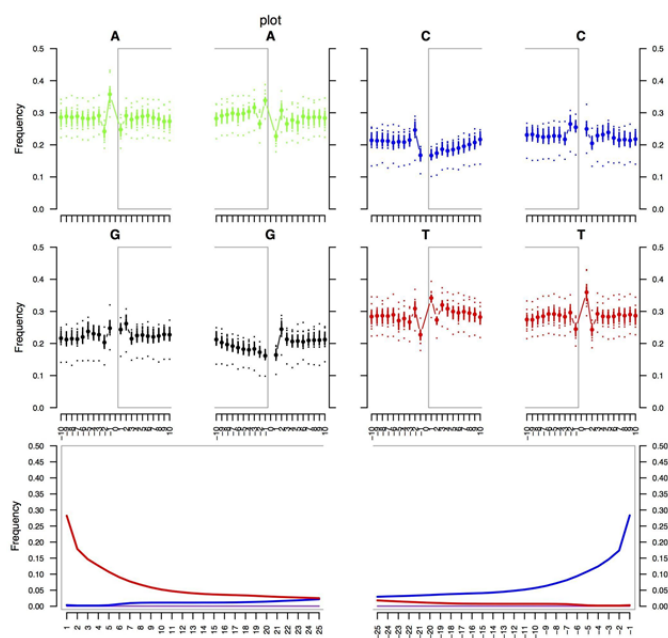

66 **Supplementary Figure 3: MapDamage analysis.** Deamination changes typical of ancient DNA  
67 are shown for **A) HXH B) CTC.**  
68  
69  
70  
71  
72

73 **Supplementary Figure 4**  
 74

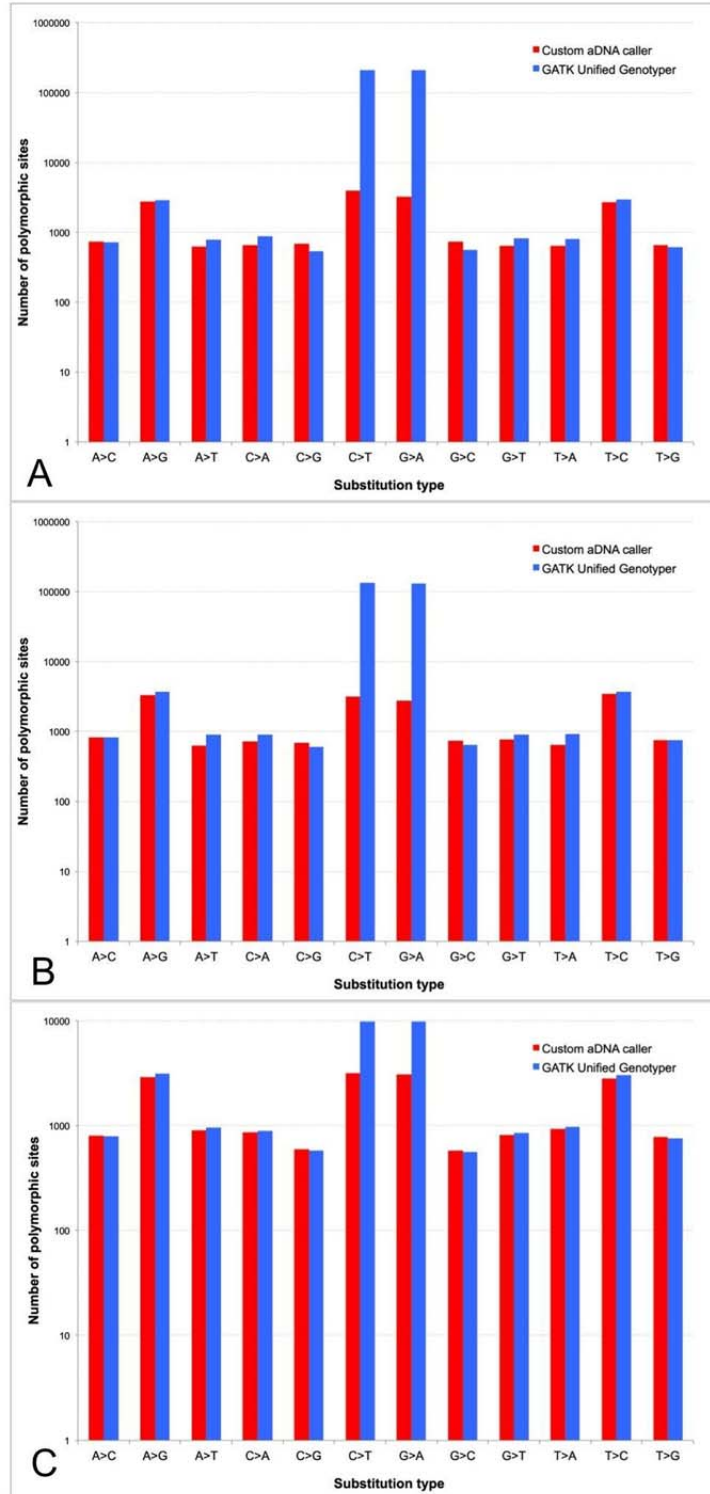

75 **Supplementary Figure 4: Substitution Counts.** Comparison of base substitution count with  
 76 Weibull-based caller (red) and the GATK Unified Genotyper caller (blue). A) HXH, B)  
 77 CTC, C) NGD. (Note Y axis is log-scaled).  
 78  
 79

80 **Supplementary Figure 5**

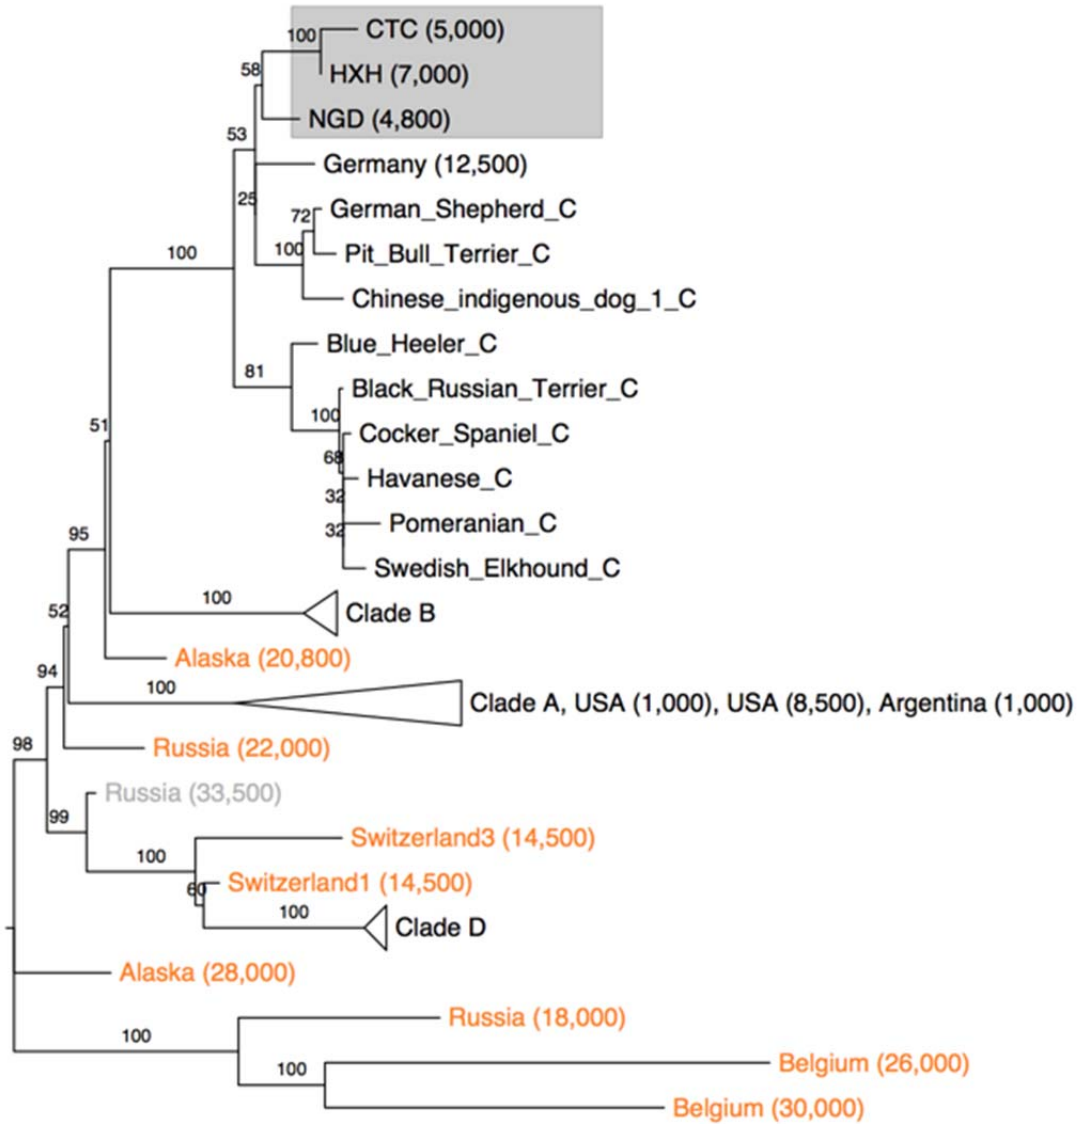

81  
 82 **Supplementary Figure 5. NJ tree depicts phylogenetic relationship of CTC and HXH**  
 83 **mitochondrial haplotypes with modern dogs and ancient canids.** Bootstrap values are drawn  
 84 at the branches. Clade membership of modern dogs (A-D) are written into the sample name after  
 85 the underscore and year indicating the approximate reported age is written after the ancient  
 86 sample names. HXH, CTC, and NGD are boxed in light grey. Dogs, wolves, and ambiguous  
 87 taxonomic classifications are labeled black, orange, and grey, respectively.

88  
 89  
 90  
 91  
 92  
 93  
 94  
 95

96 **Supplementary Figure 6**  
 97

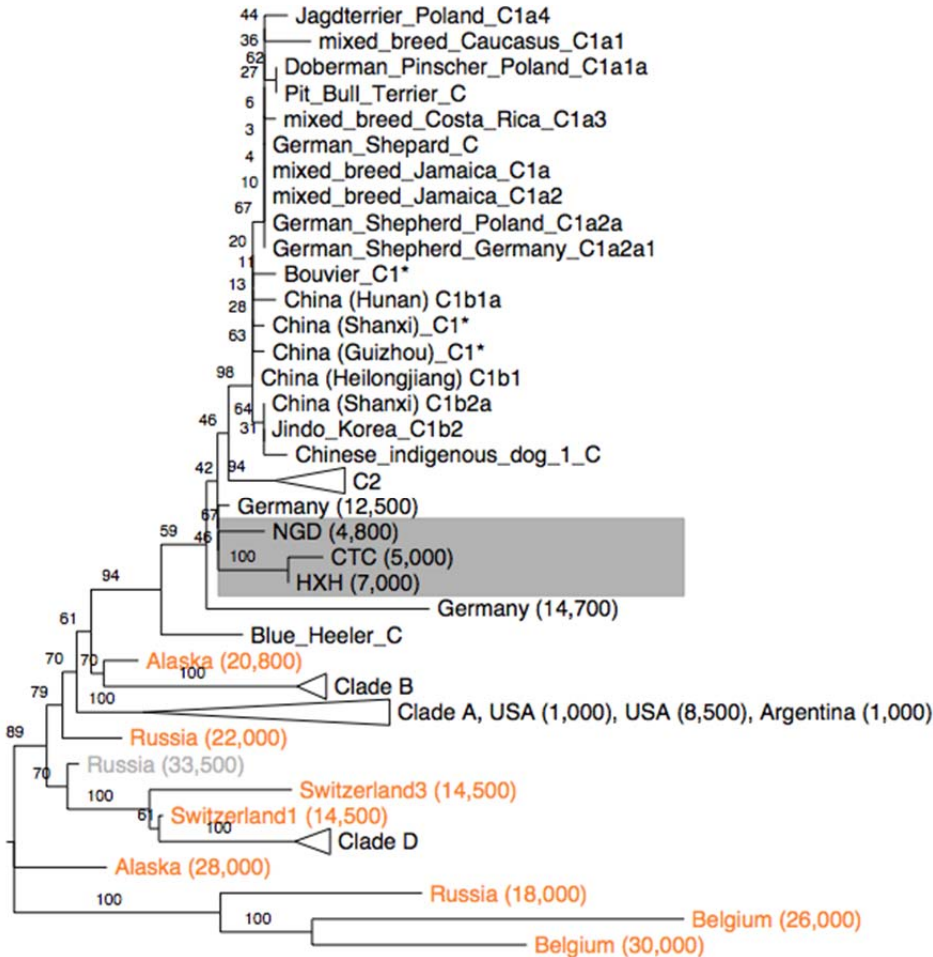

98  
 99

100 **Supplementary Figure 6. NJ tree depicts phylogenetic relationship of CTC and HXH**  
 101 **mitochondrial haplotypes with low coverage Bonn Oberkassel ancient dog.** Bootstrap values  
 102 are drawn at the branches. Clade membership of modern dogs (A-D) are written into the sample  
 103 name after the underscore and year indicating the approximate reported age is written after the  
 104 ancient sample names. Dogs, wolves, and ambiguous taxonomic classifications are labeled black,  
 105 orange, and grey, respectively. Mitochondrial haplogroups annotated by Duleba *et al.* are written  
 106 after the final underscore following the sample name. The asterisk (\*) following the haplogroup  
 107 of three C1 dogs indicates their haplogroups are not representative of C1a and C1b. Dogs,  
 108 wolves, and ambiguous taxonomic classifications are labeled black, orange, and grey,  
 109 respectively. The Bonn Oberkassel dog is labeled as Germany (14,700).

110  
 111  
 112  
 113  
 114  
 115  
 116

117 **Supplementary Figure 7**

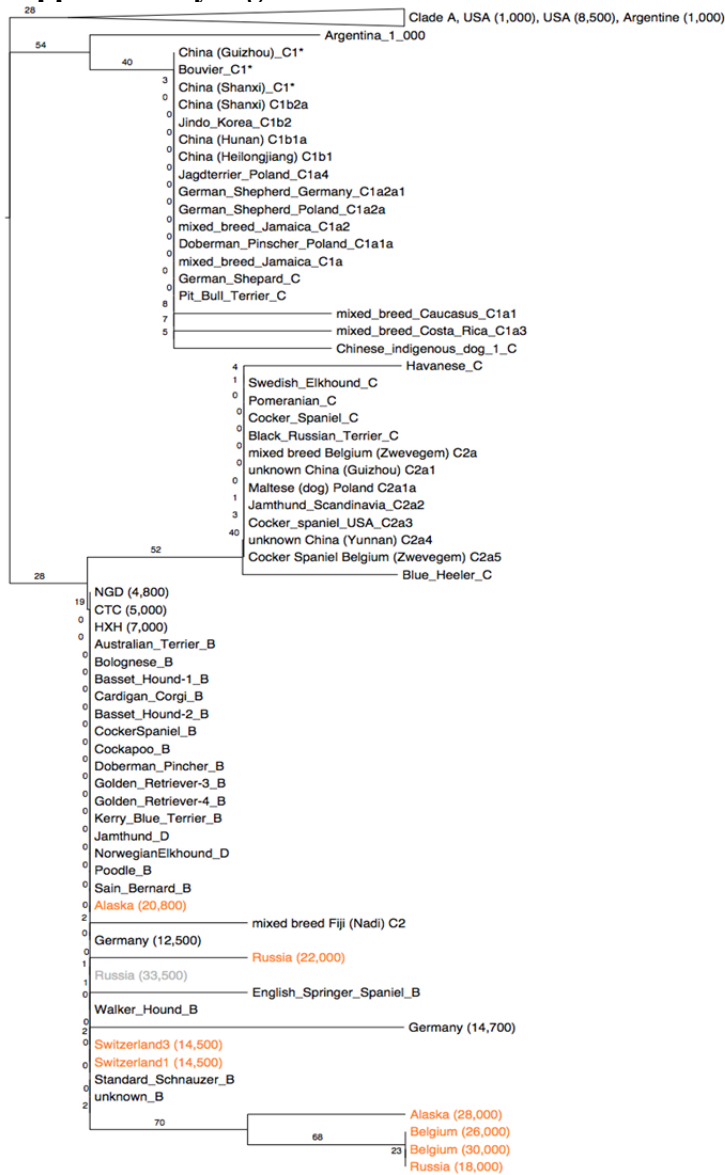

118  
 119 **Supplementary Figure 7. NJ tree depicts phylogenetic relationship of CTC and HXH**  
 120 **mitochondrial haplotypes with low coverage Bonn Oberkassel ancient dog (transversions**  
 121 **only). Bootstrap values are drawn at the branches. Clade membership of modern dogs (A-D) are**  
 122 **written into the sample name after the underscore and year indicating the approximate reported**  
 123 **age is written after the ancient sample name. Dogs, wolves, and ambiguous taxonomic**  
 124 **classifications are labeled black, orange, and grey, respectively. Mitochondrial haplogroups**  
 125 **annotated by Duleba *et al.* are written after the final underscore following the sample name. The**  
 126 **asterisk (\*) following the haplogroup of three C1 dogs indicates their haplogroups are not**  
 127 **representative of C1a and C1b. Dogs, wolves, and ambiguous taxonomic classifications are**  
 128 **labeled black, orange, and grey, respectively. The Bonn Oberkassel dog is labeled as Germany**  
 129 **(14,700).**

130  
 131



132 **Supplementary Figure 8**  
 133  
 134

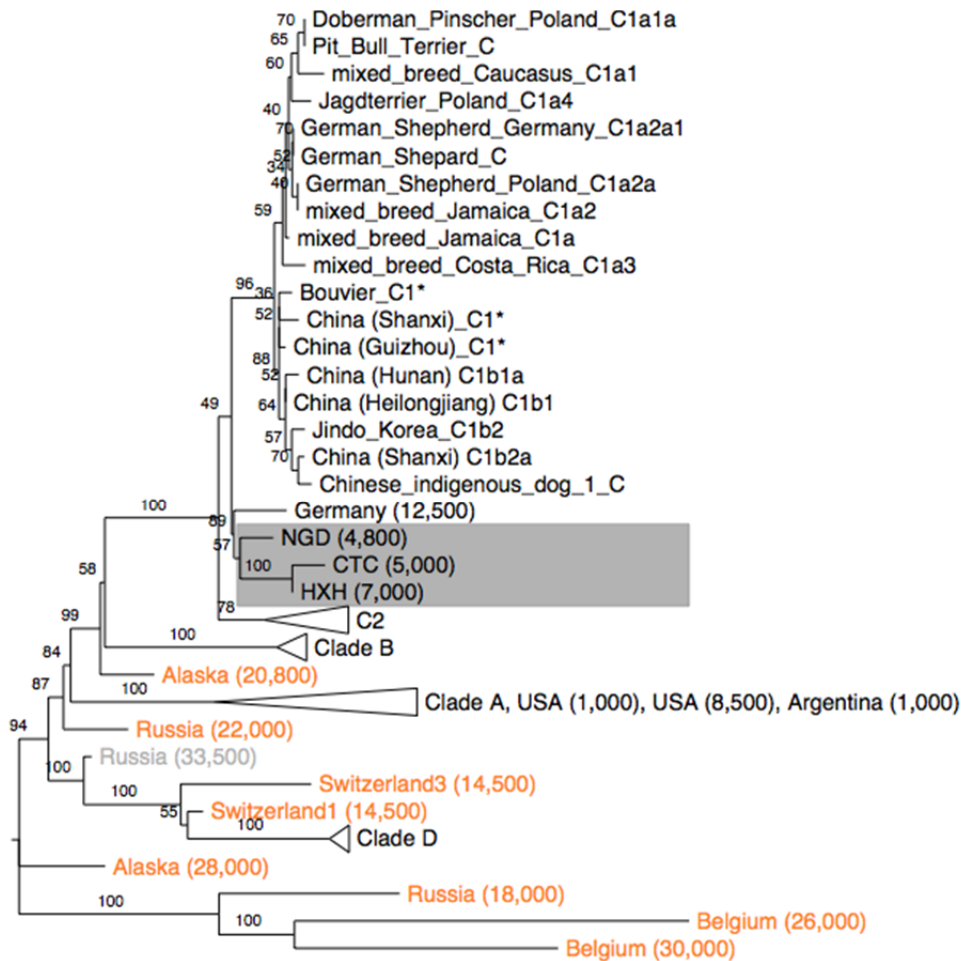

135  
 136  
 137 **Supplementary Figure 8: NJ tree depicts phylogenetic relationship of CTC and HXH**  
 138 **mitochondrial haplotypes with 24 additional Clade C mitochondria samples for granular**  
 139 **haplogroup identification.** Bootstrap values are drawn at the branches. Clade membership of  
 140 modern dogs (A-D) are written into the sample name after the underscore and year indicating the  
 141 approximate reported age is written after the ancient sample names. HXH, CTC and NGD are  
 142 boxed in light grey. Mitochondrial haplogroups annotated by Duleba *et al.* are written after the  
 143 final underscore following the sample name. The asterisk (\*) following the haplogroup of three  
 144 C1 dogs indicates their haplogroups are not representative of C1a and C1b. Dogs, wolves, and  
 145 ambiguous taxonomic classifications are labeled black, orange, and grey, respectively.

146  
 147  
 148  
 149  
 150  
 151  
 152

153 **Supplementary Figure 9**

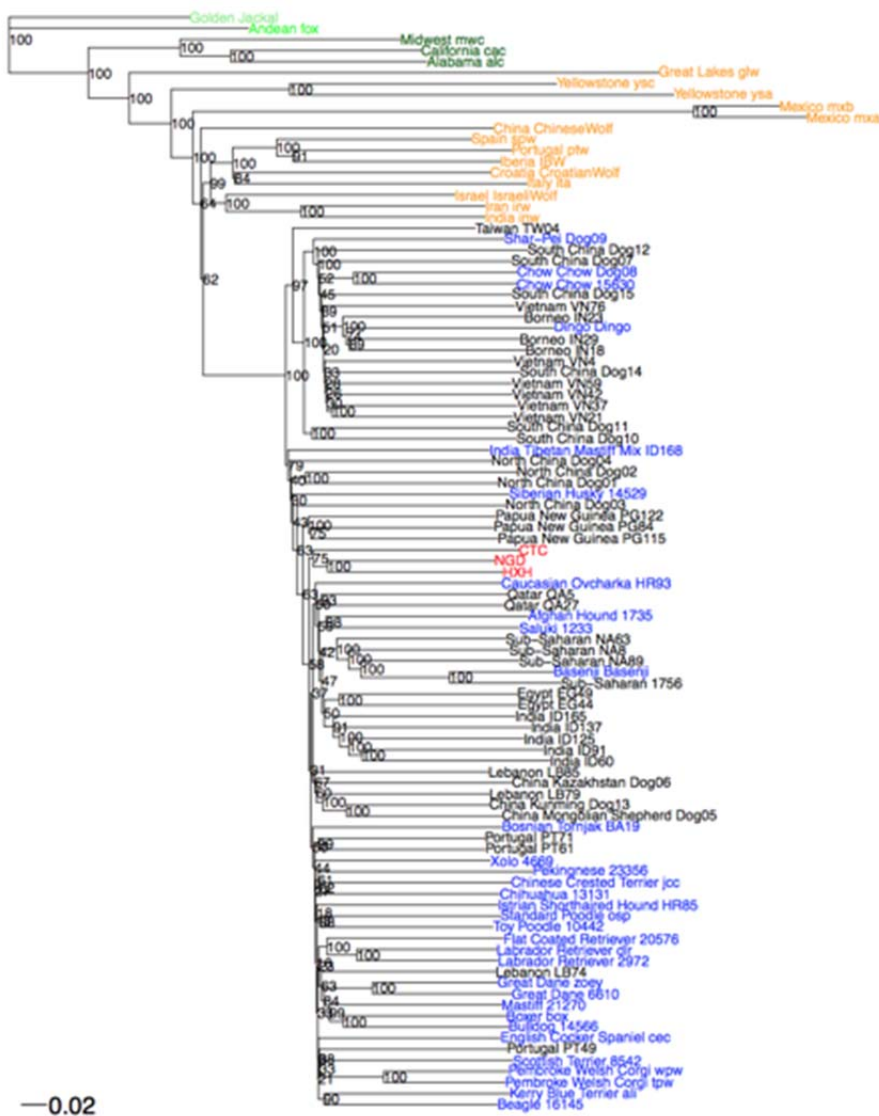

154 **Supplementary Figure 9: NJ tree.** NJ tree based on pairwise genetic distances using whole  
 155 genome snp set of 99 samples, including Andean fox (green), golden jackal (light green), coyotes  
 156 (dark green), wolves (orange), ancient samples (red), village dogs (purple), and breed dogs  
 157 (blue).  
 158  
 159  
 160  
 161  
 162  
 163  
 164  
 165  
 166  
 167  
 168

169 **Supplementary Figure 10**  
 170

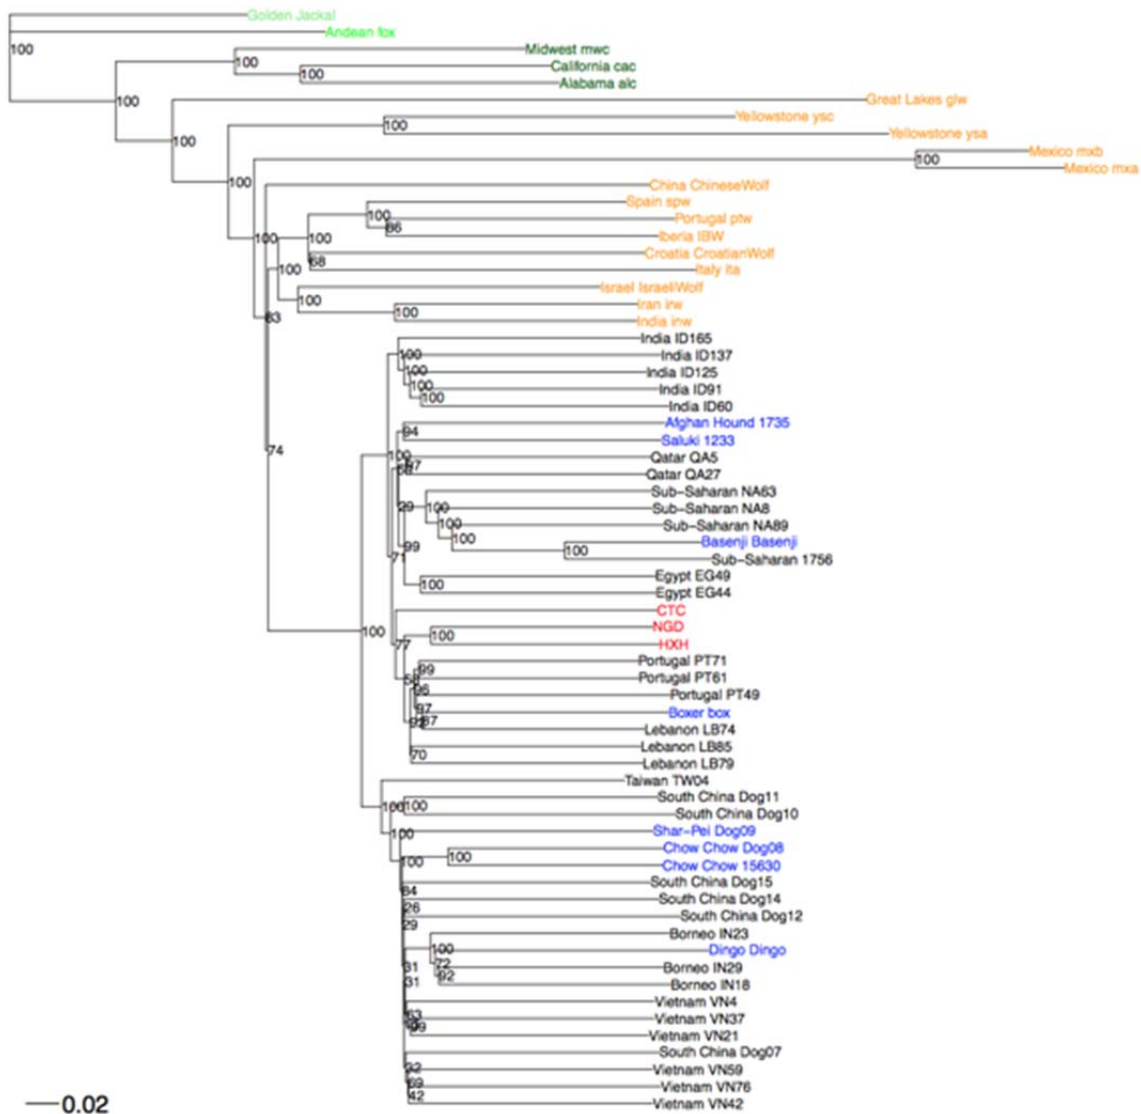

171  
 172 **Supplementary Figure 10: NJ tree.** NJ tree based on pairwise genetic distances using whole  
 173 genome snp set of 65 samples, including andean fox (green), golden jackal (light green), coyotes  
 174 (dark green), wolves (orange), ancient samples (red), village dogs (purple), and breed dogs  
 175 (blue). Village dogs from north China and Papua New Guinea and most European breeds are  
 176 removed from this set.

177  
 178

179 **Supplementary Figure 11**

180

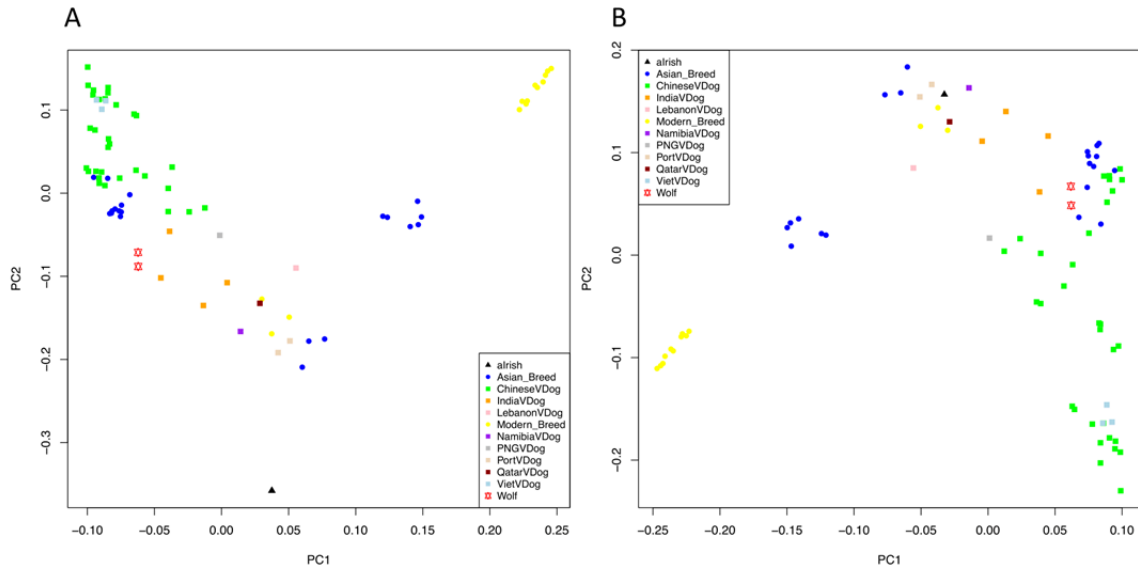

181

182 **Supplementary Figure 11: PCA with and without doubling Newgrange dog from Frantz *et***

183 ***al.*** . A) Principal component analysis based on 269,512 transversions ascertained solely in the  
184 genome-wide data-set from Frantz *et al.* where NGD dog (aIrish) is doubled (with and without  
185 quality score re-calibration), equivalent to Figure S9 in Frantz *et al.*. B) Principal component  
186 analysis based on 269,512 transversion ascertained solely in the genome-wide data-set from  
187 Frantz *et al.* where only the NGD dog is retained, without quality score recalibration.

188

189

190

191

192

193

194

195

196

197

198

199

200

201

202

203

204

205

206

207

208 **Supplementary Figure 12**

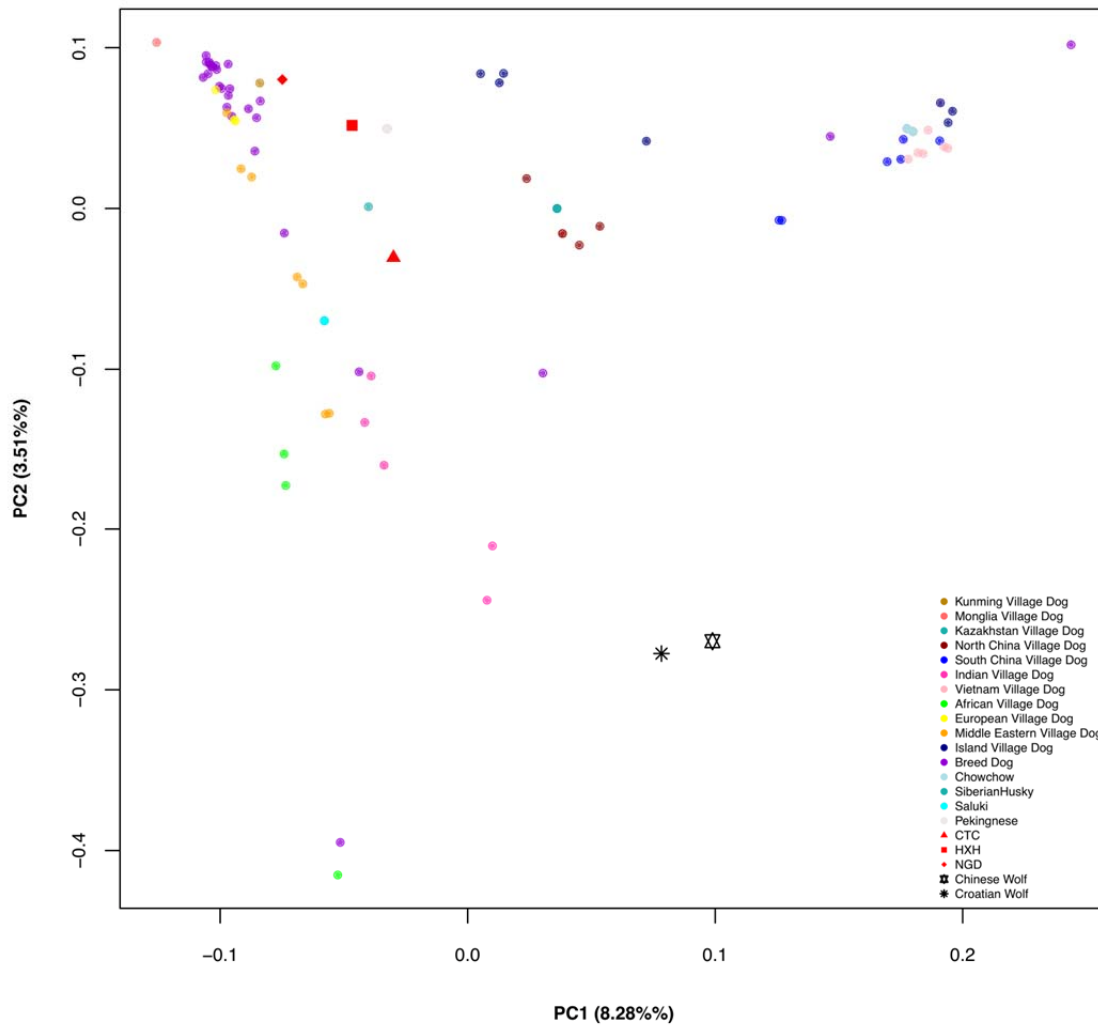

209

210 **Supplementary Figure 12: PCA using SNPs from Frantz *et al.* on our dataset.** A. Principal  
211 component analysis on our samples based on 269,512 transversions ascertained solely in the  
212 genome-wide data-set from Frantz *et al.* . We included all the dogs from our sample set and  
213 chose two wolves, a Chinese wolf and Croatian wolf.

214  
215  
216  
217  
218  
219  
220  
221  
222  
223  
224

225 **Supplementary Figure 13**

226

227 **A**

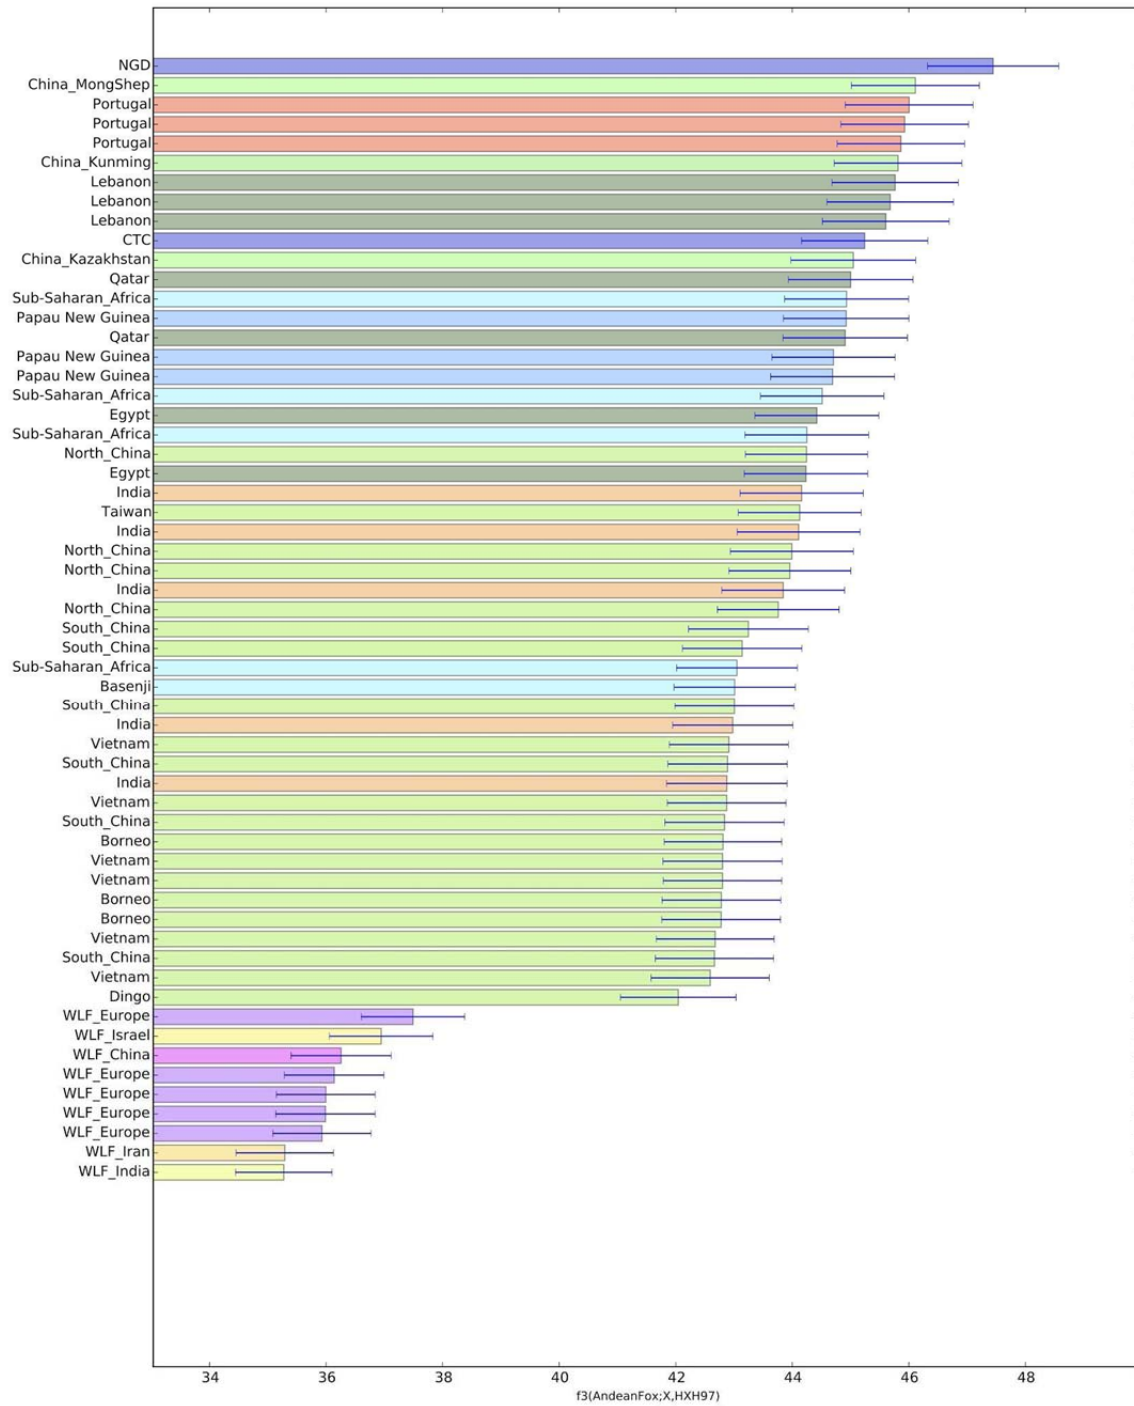

228

229

230

231

232

233

234  
235  
236

**B**

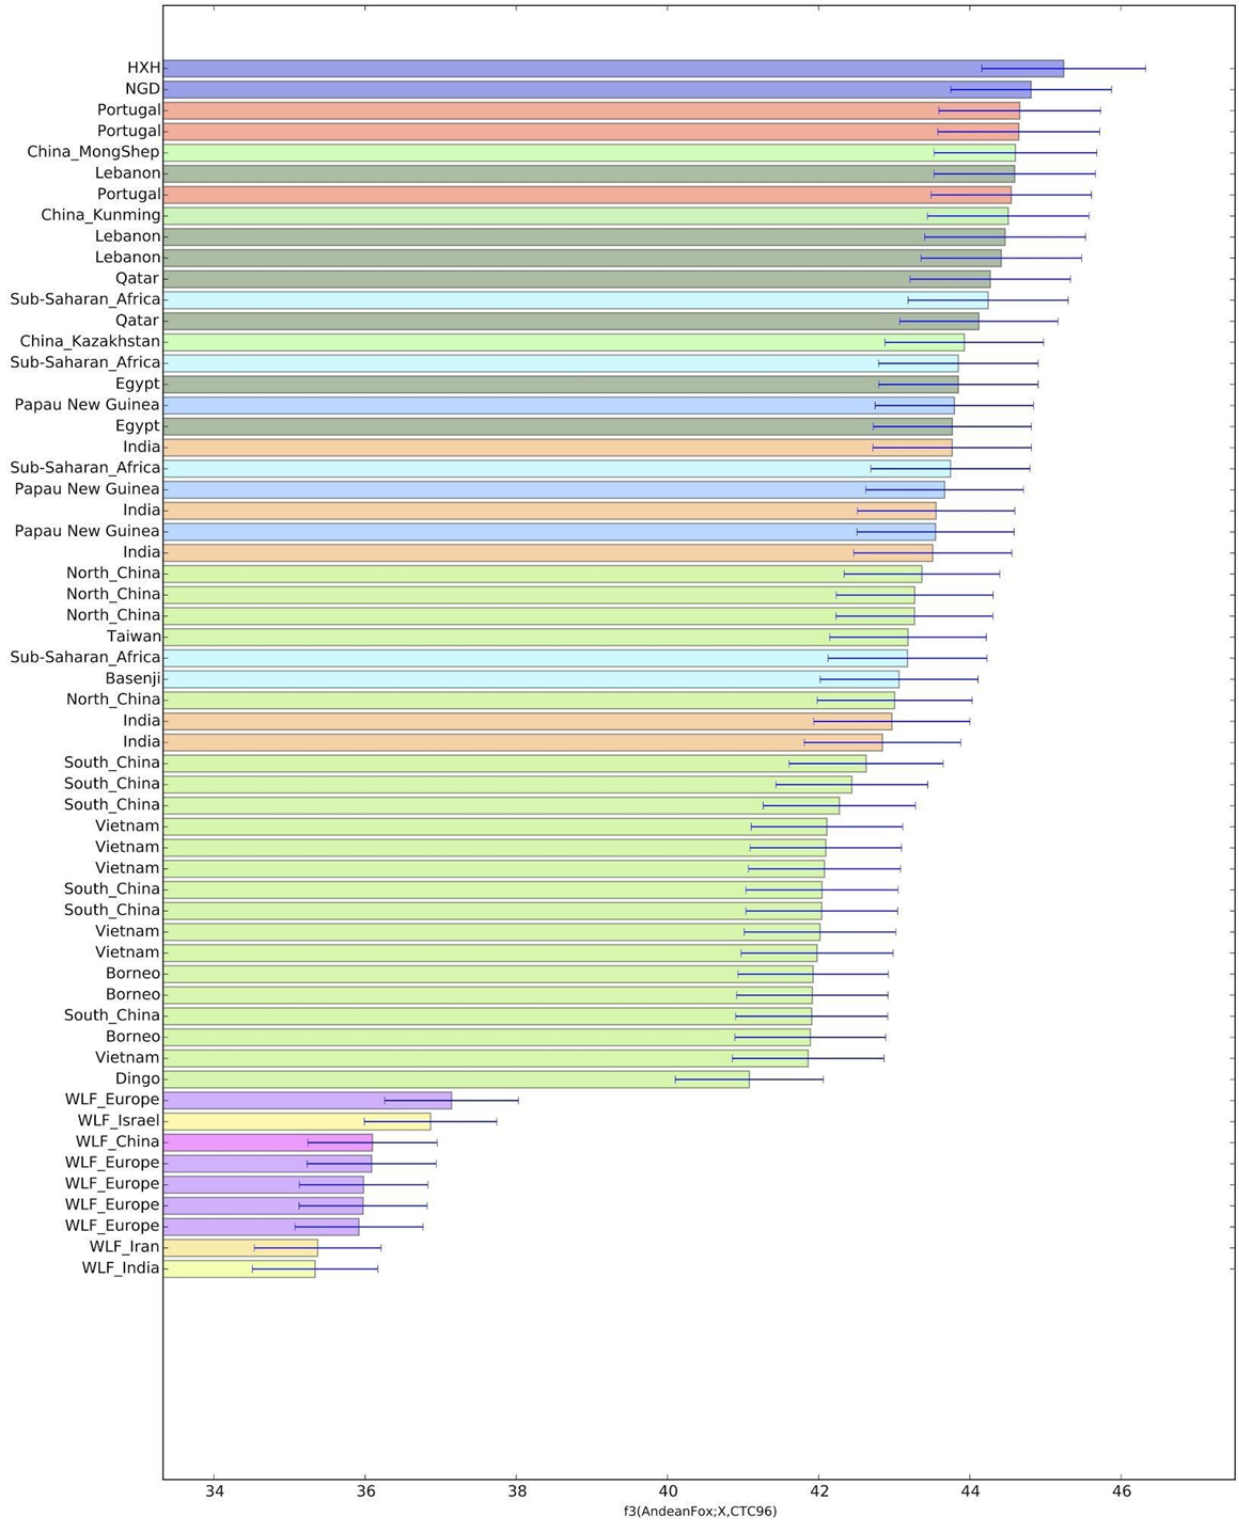

237  
238  
239

240  
241  
242  
243

C

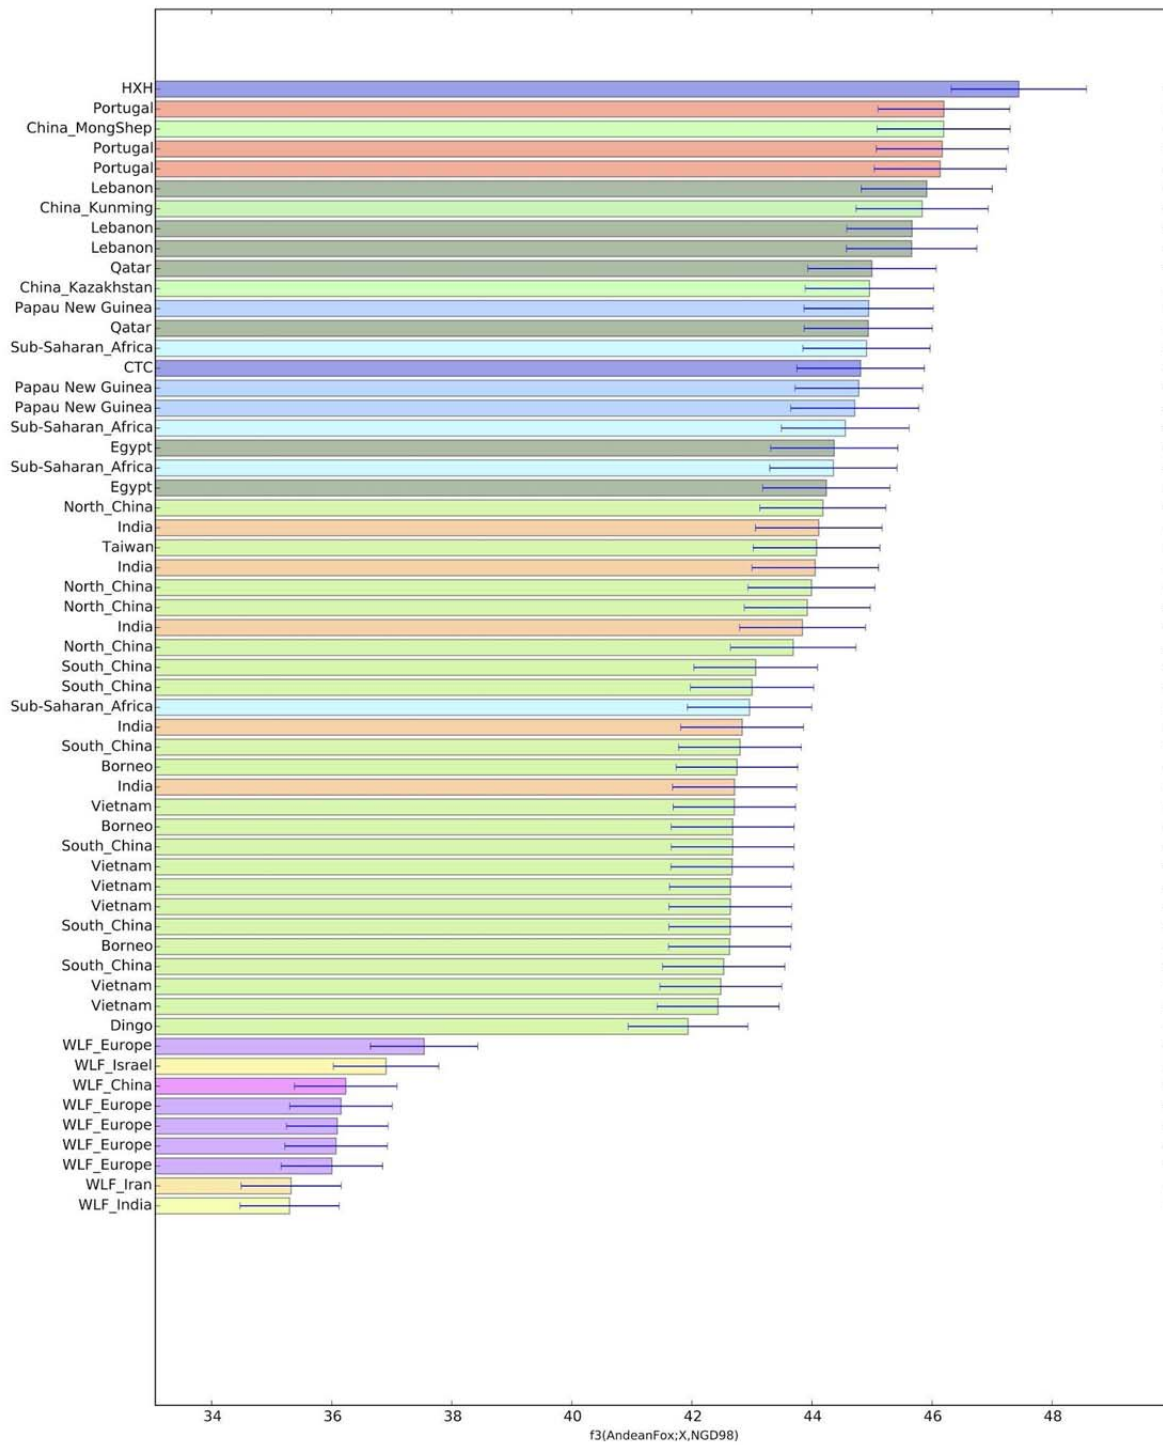

244  
245  
246  
247

Supplementary Figure 13: Outgroup  $f_3$ -analysis using the whole genome SNP dataset. A) HXH B) CTC C) NGD



248 **Supplementary Figure 14**

249

250 **A**

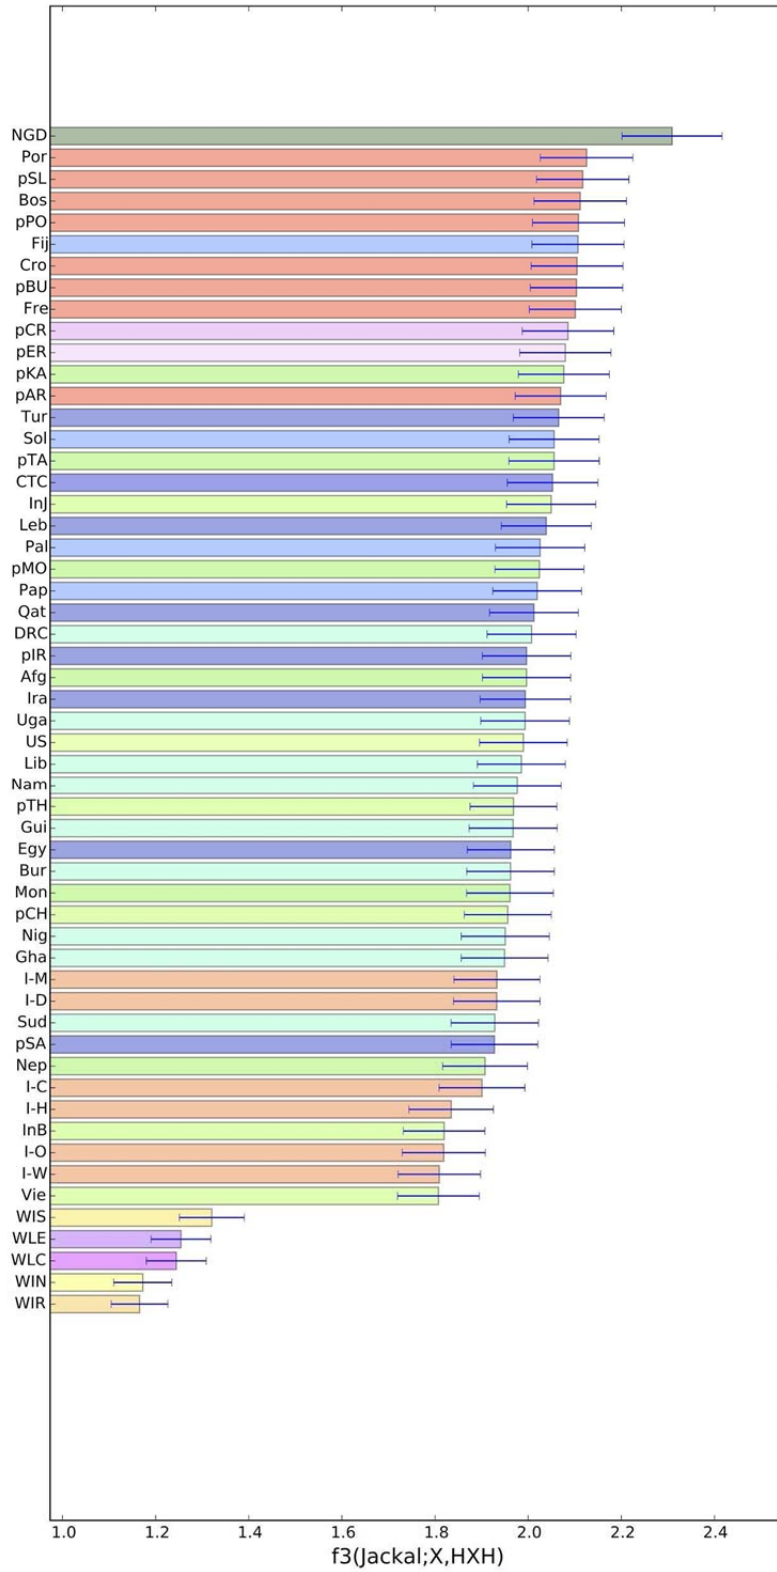

251

252  
253

**B**

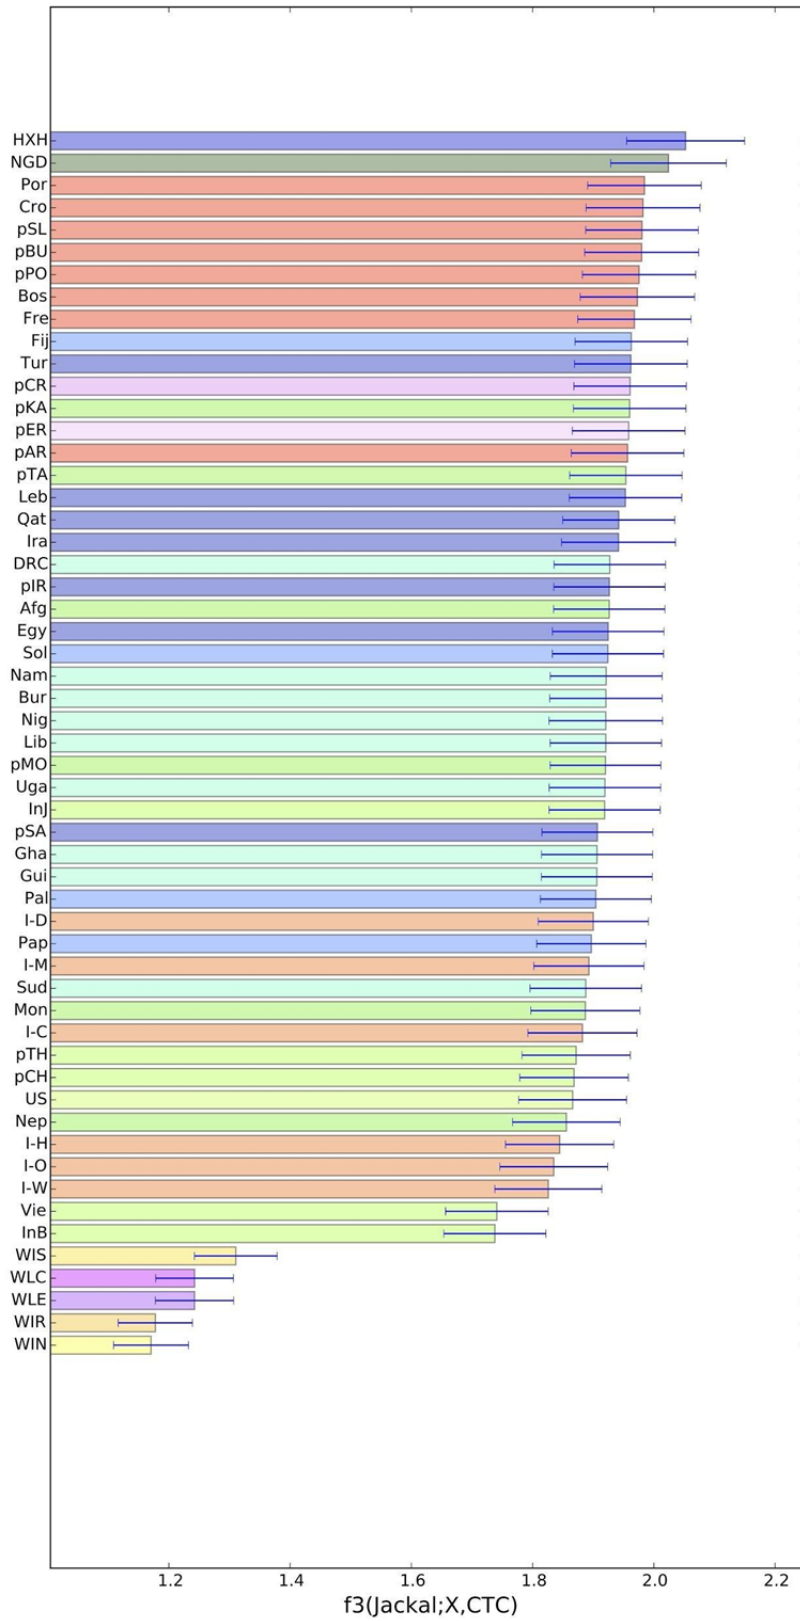

254  
255

256  
257

C

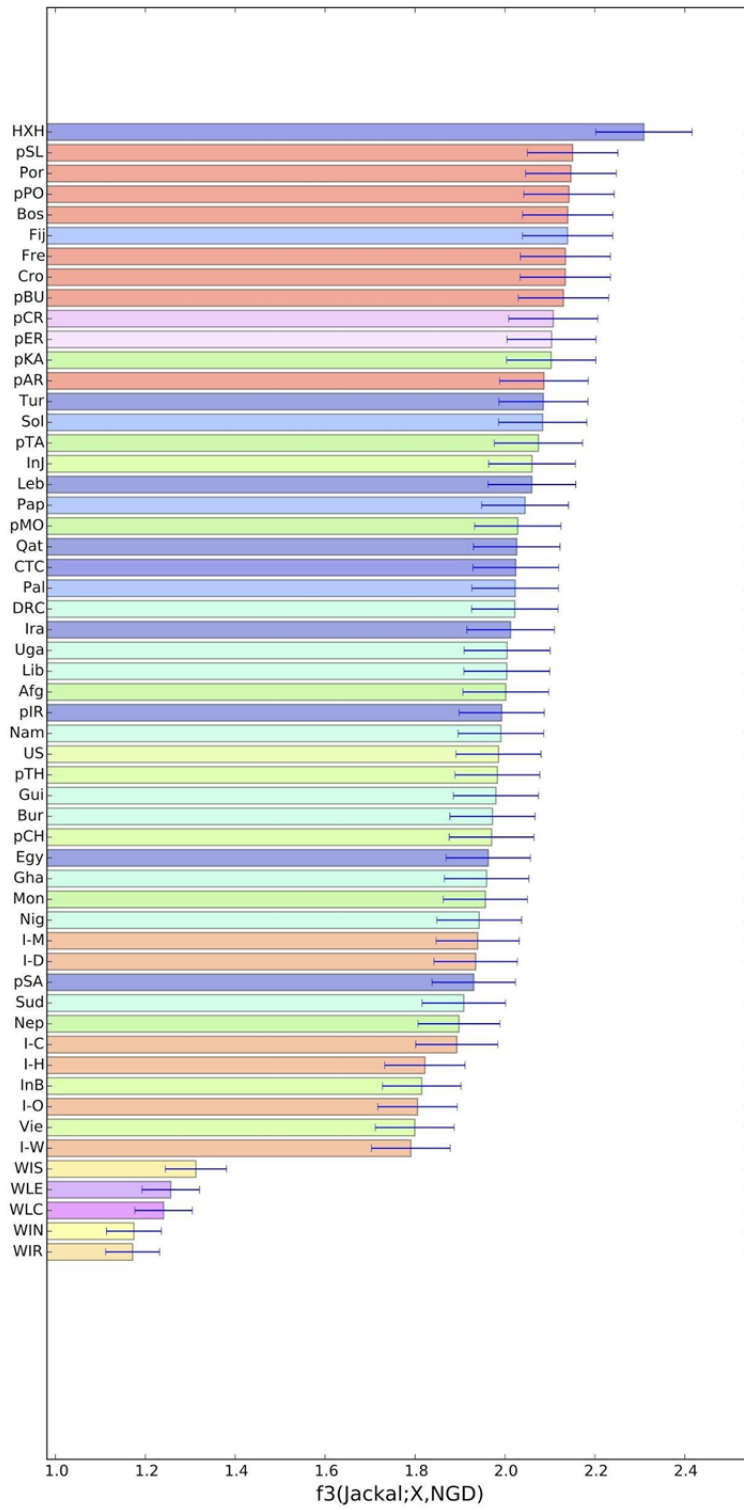

258  
259  
260  
261

**Supplementary Figure S14: Outgroup  $f_3$ -analysis using genotype SNP array dataset. A) HXH B) CTC C) NGD**

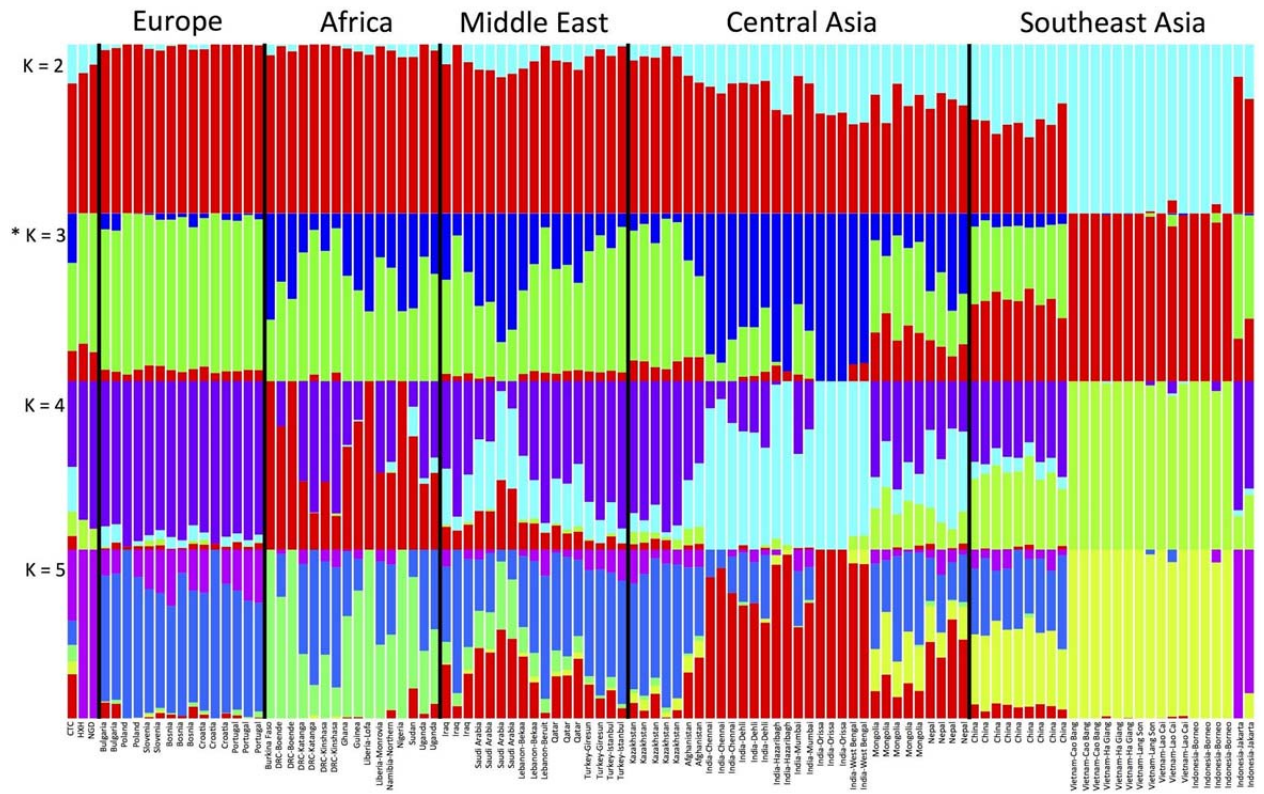

264  
 265 **Supplementary Figure 15: ADMIXTURE analysis.** Results shown for  $K = 2$  through 5 for a  
 266 global representation of village dogs, CTC, HXH and NGD. Vertical lines represent individual  
 267 dogs.  
 268  
 269  
 270  
 271  
 272  
 273  
 274  
 275  
 276  
 277  
 278  
 279  
 280  
 281  
 282  
 283  
 284  
 285  
 286

287  
288  
289

### Supplementary Figure 16

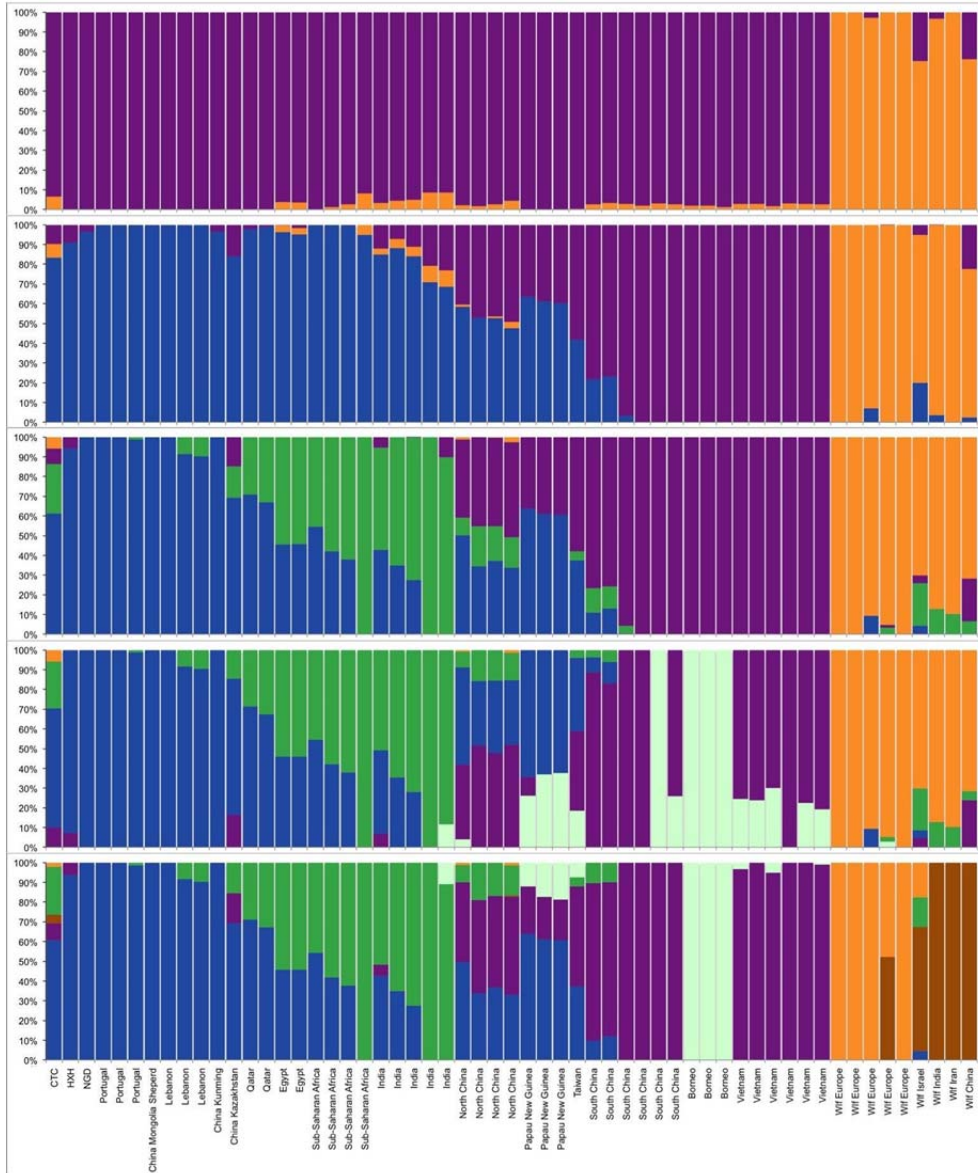

290  
291  
292  
293  
294  
295  
296  
297  
298  
299  
300  
301

**Supplementary Figure 16. NGSadmixture analysis.** Shown results for clustering for  $K=2$  to 6 ancestry components.

302  
303

**Supplementary Figure 17**

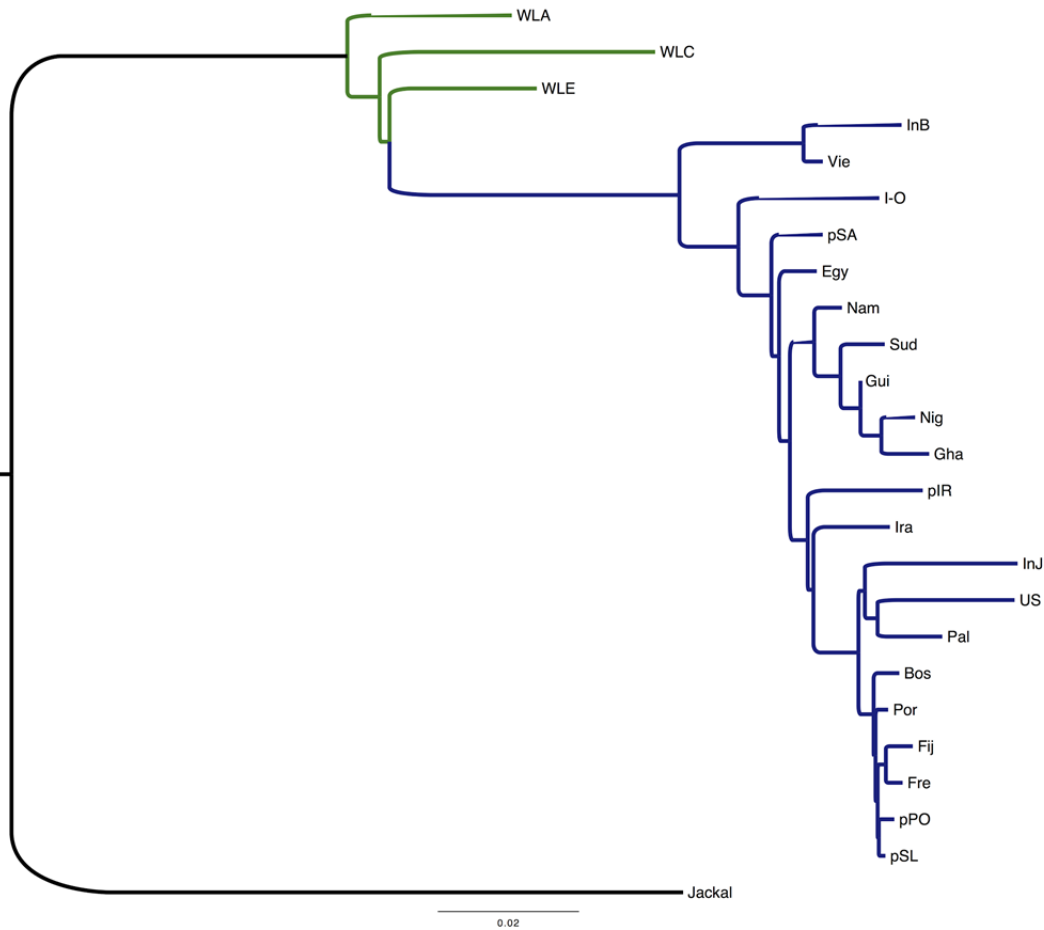

304  
305  
306  
307  
308  
309  
310  
311  
312  
313  
314  
315  
316  
317  
318  
319  
320  
321  
322  
323

**Supplementary Figure 17** NJ tree for the genotype SNP dataset were admixed populations detected using an  $f_3$ -statistic have been excluded.

324  
325

**Supplementary Figure 18**

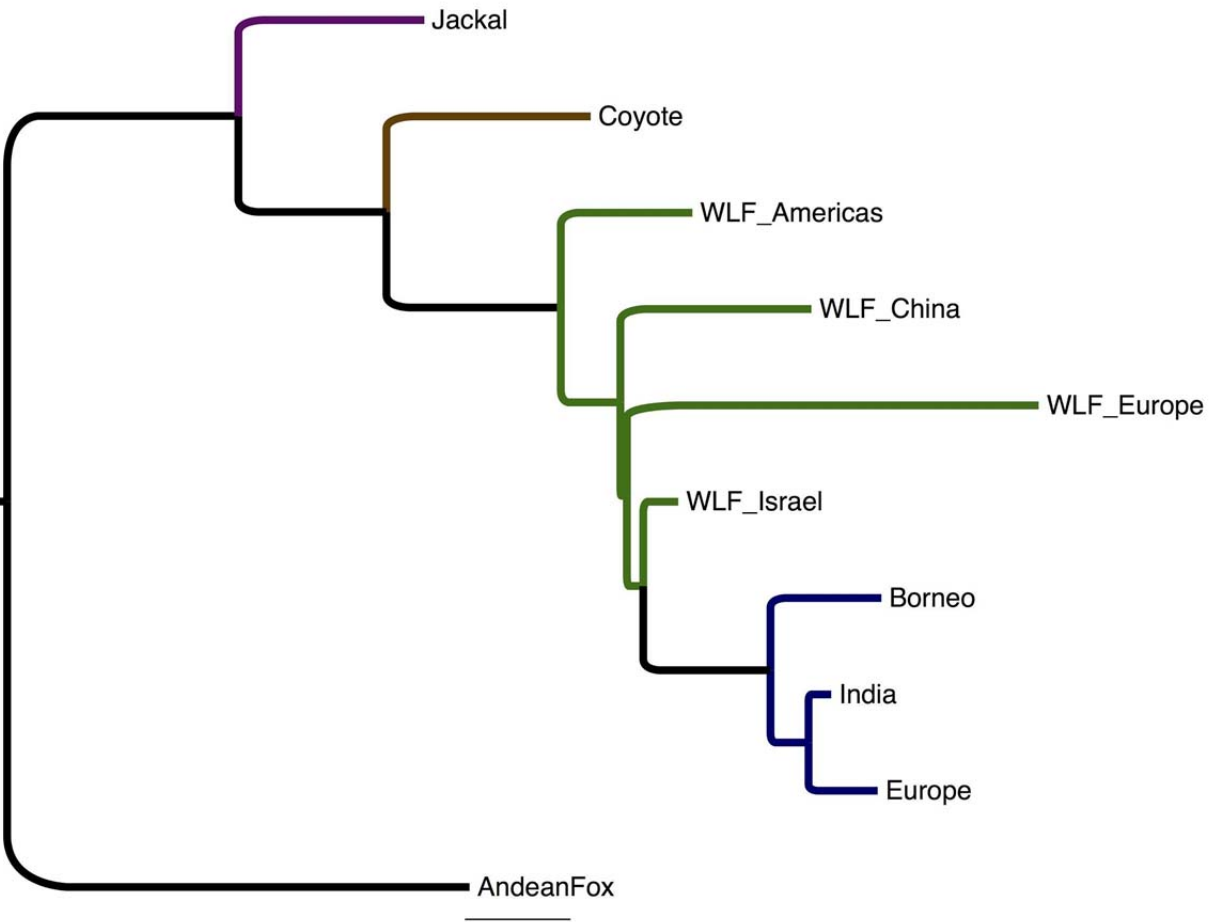

326  
327  
328  
329  
330  
331  
332  
333  
334  
335  
336  
337  
338  
339  
340  
341  
342  
343  
344  
345

**Supplementary Figure 18:** NJ tree for the whole genome SNP dataset were admixed populations detected using an  $f_3$ -statistic have been excluded.

346  
347

**Supplementary Figure 19**

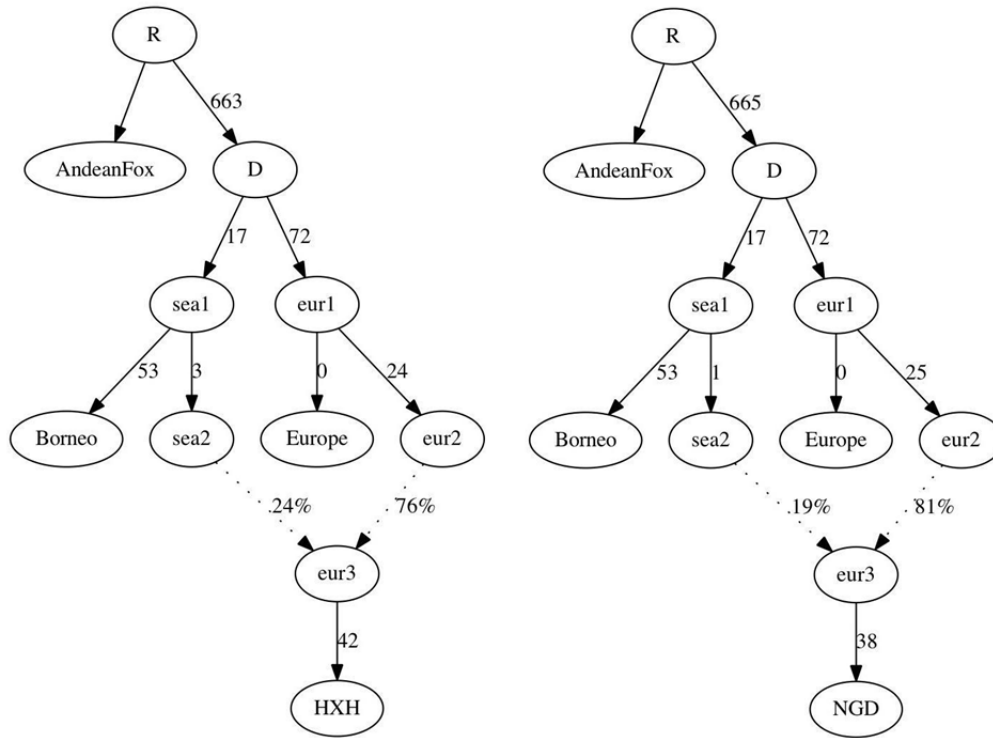

348

349 **Supplementary Figure 19:** Best fit admixture graph for HXH (left) and NGD (right) when  
350 including modern European and Southeast Asian village dogs.

351  
352  
353  
354  
355  
356  
357  
358  
359  
360  
361  
362  
363  
364  
365  
366  
367  
368  
369  
370



371  
 372 **Supplementary Figure 20**  
 373

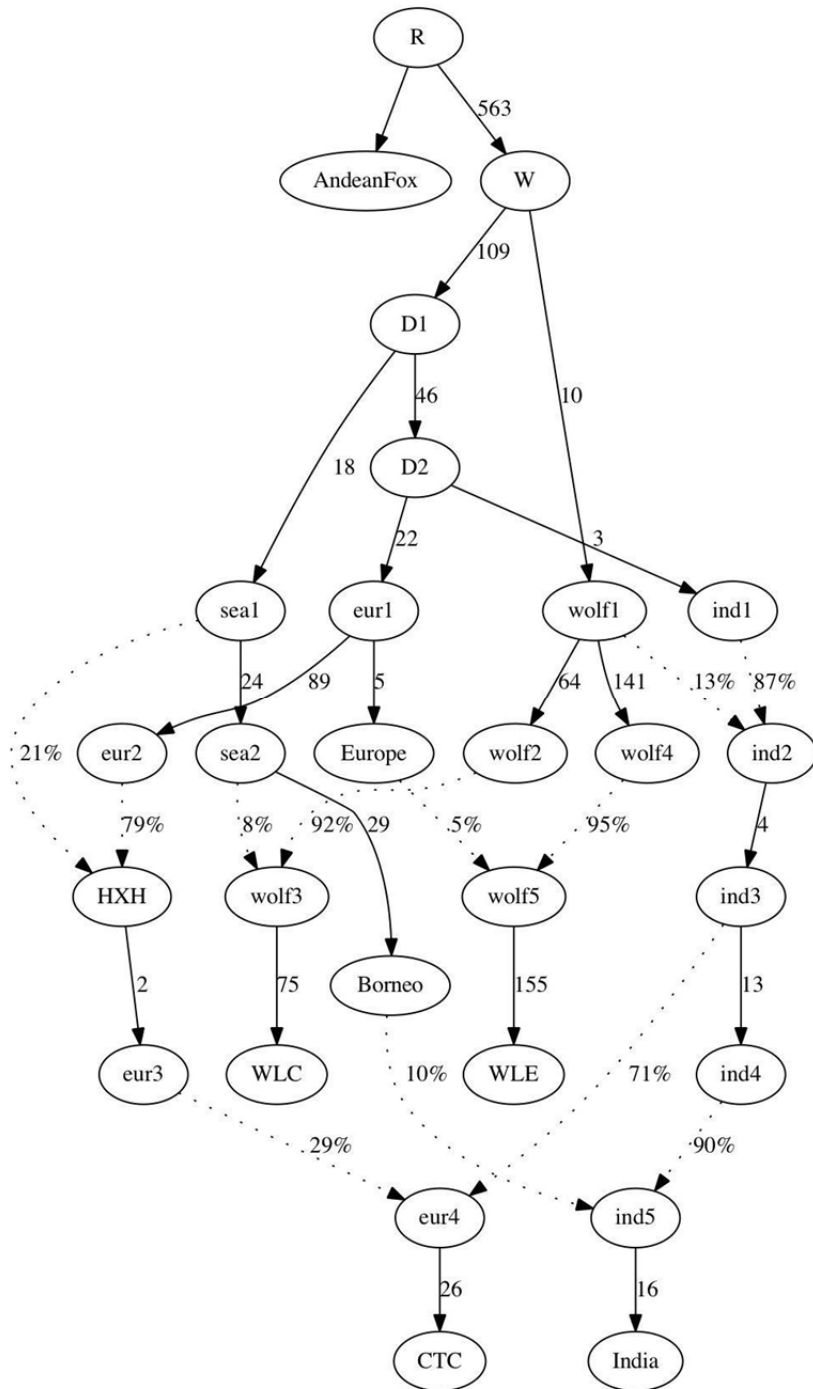

374  
 375 **Supplementary Figure 20: Admixture graph incorporating HXH, CTC, modern village dogs**  
 376 **and wolves**  
 377  
 378

379  
380 **Supplementary Figure 21**  
381

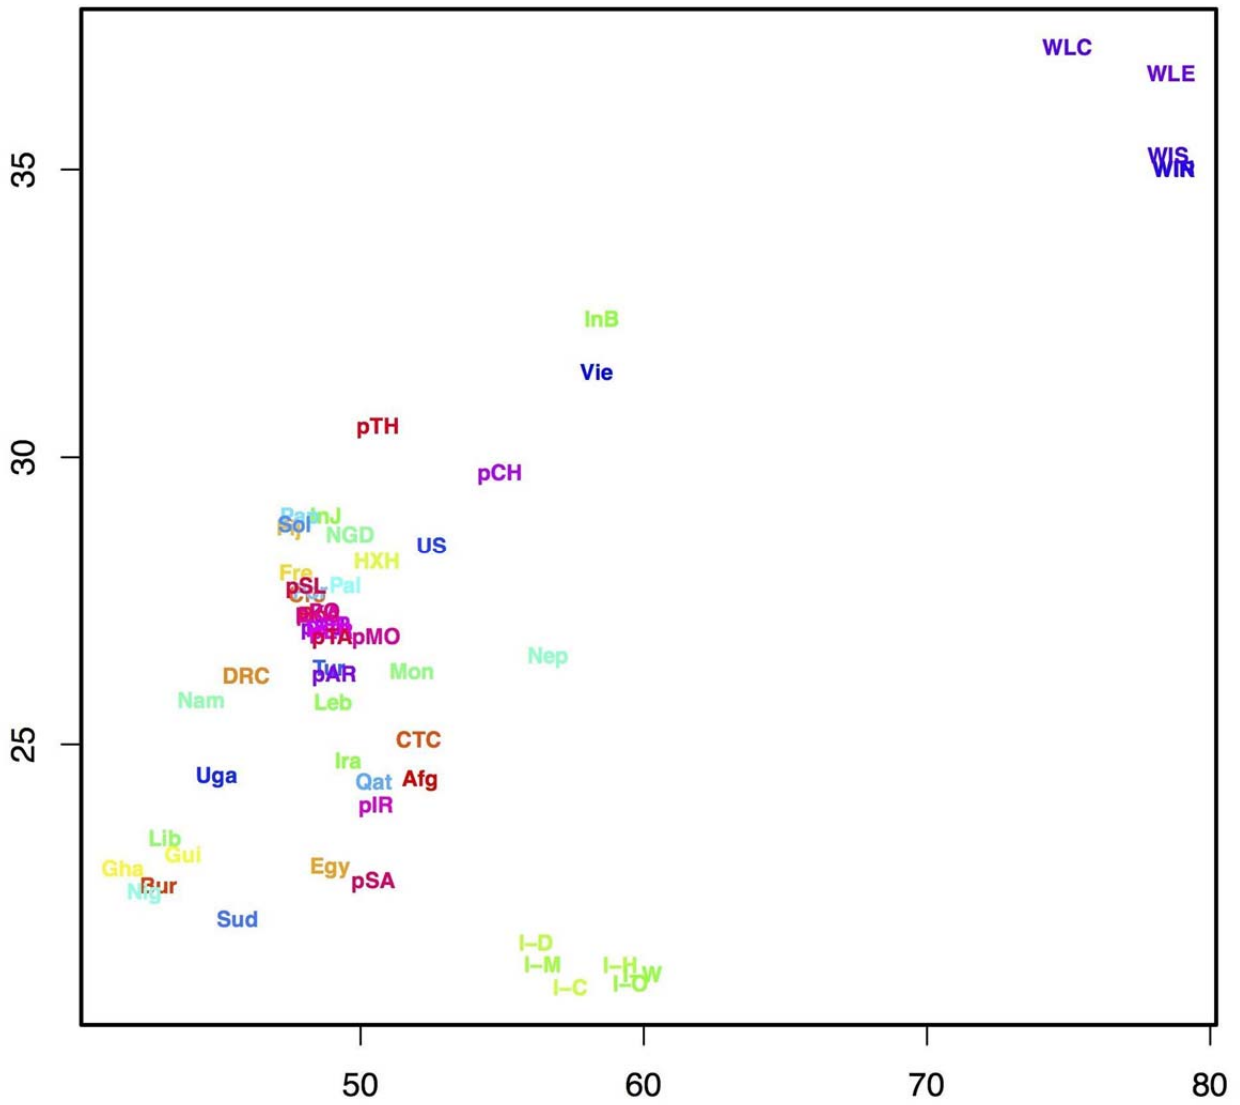

382  
383 **Supplementary Figure 21: Spacemix results.** Spacemix geogenetic space of wolves, modern  
384 dogs and CTC (orange), HXH (light green) and NGD (green).

385  
386  
387  
388  
389  
390  
391  
392  
393

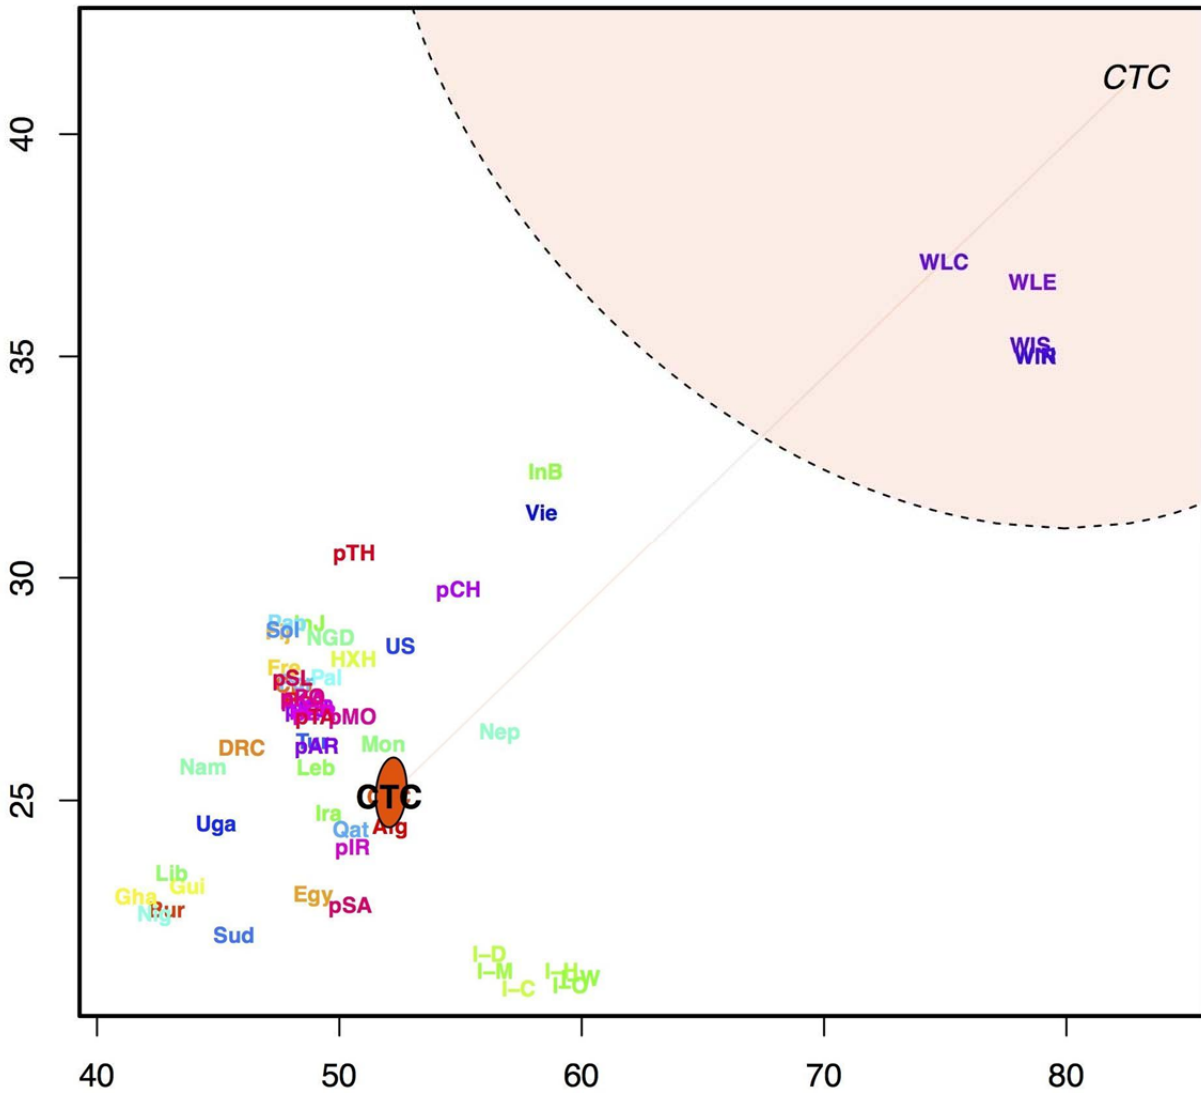

396  
397 **Supplementary Figure 22: CTC - Wolf admixture as inferred by SpaceMix. CTC in bold**  
398 **type reflects the samples geogenetic position (95% CI solid orange ellipse), CTC in italics**  
399 **reflects the geogenetic position of the proposed source of admixture into CTC, with an estimated**  
400 **value of 9% (95% CI transparent orange ellipse).**  
401  
402  
403  
404  
405  
406  
407  
408  
409  
410

411  
412  
413

**Supplementary Figure 23**

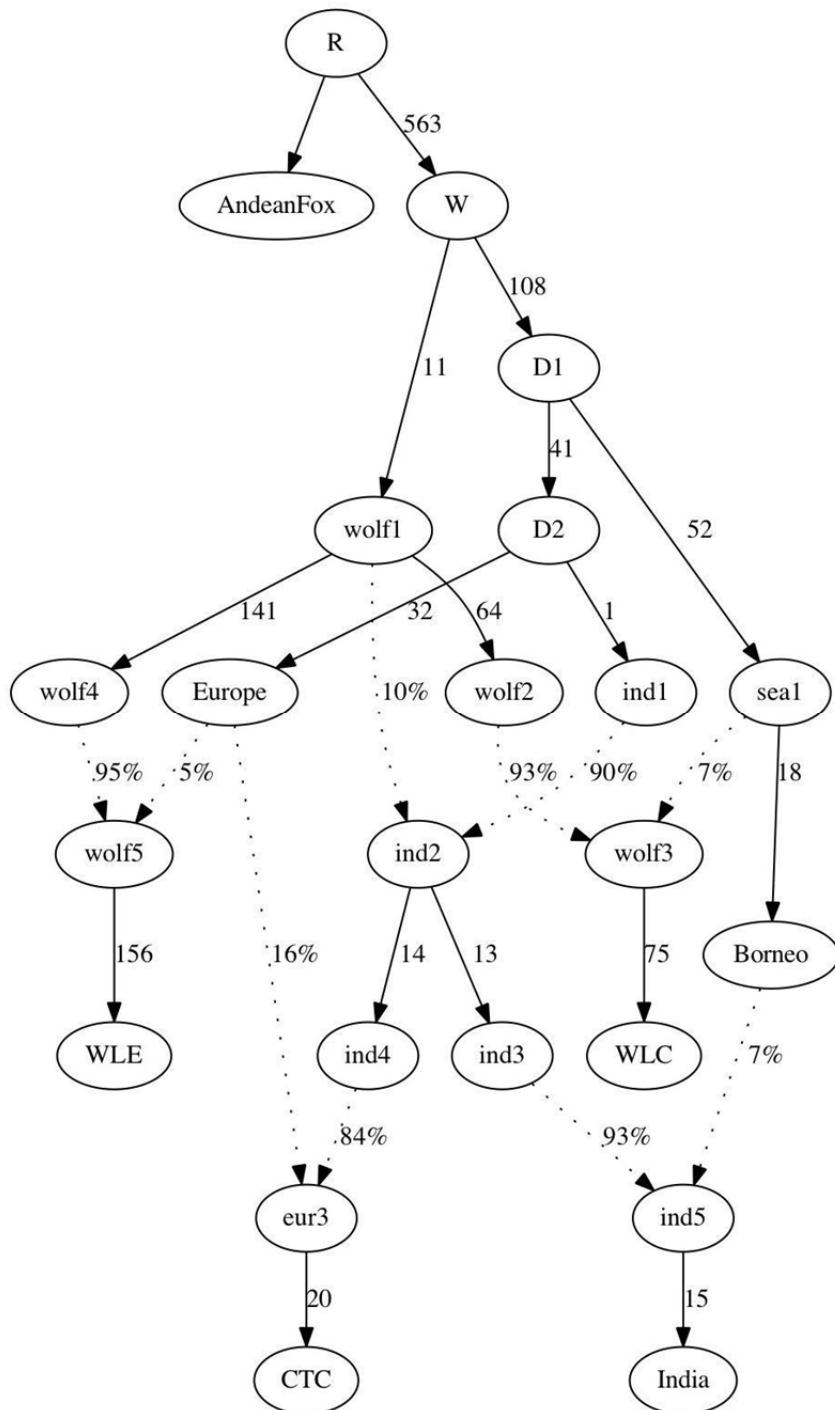

414  
415  
416  
417  
418

**Supplementary Figure 23: Admixture graph with CTC.** Model incorporates CTC, modern village dogs and wolves

419  
420  
421

**Supplementary Figure 24**

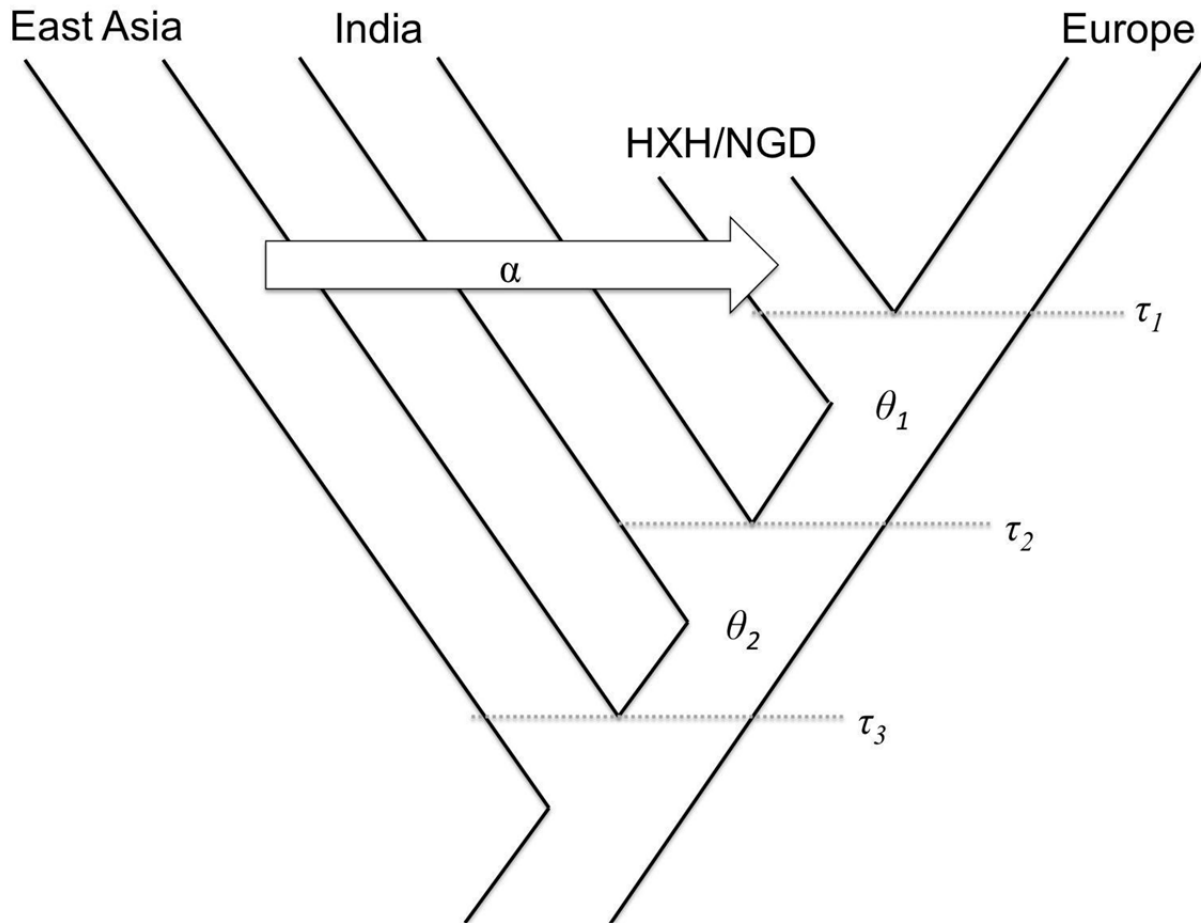

422  
423  
424  
425  
426  
427  
428  
429  
430  
431  
432  
433  
434  
435  
436  
437  
438  
439  
440

**Supplementary Figure 24: Illustration of the tree structure used for estimating HXH/Europe divergence time.**

441  
442 **Supplementary Figure 25**  
443

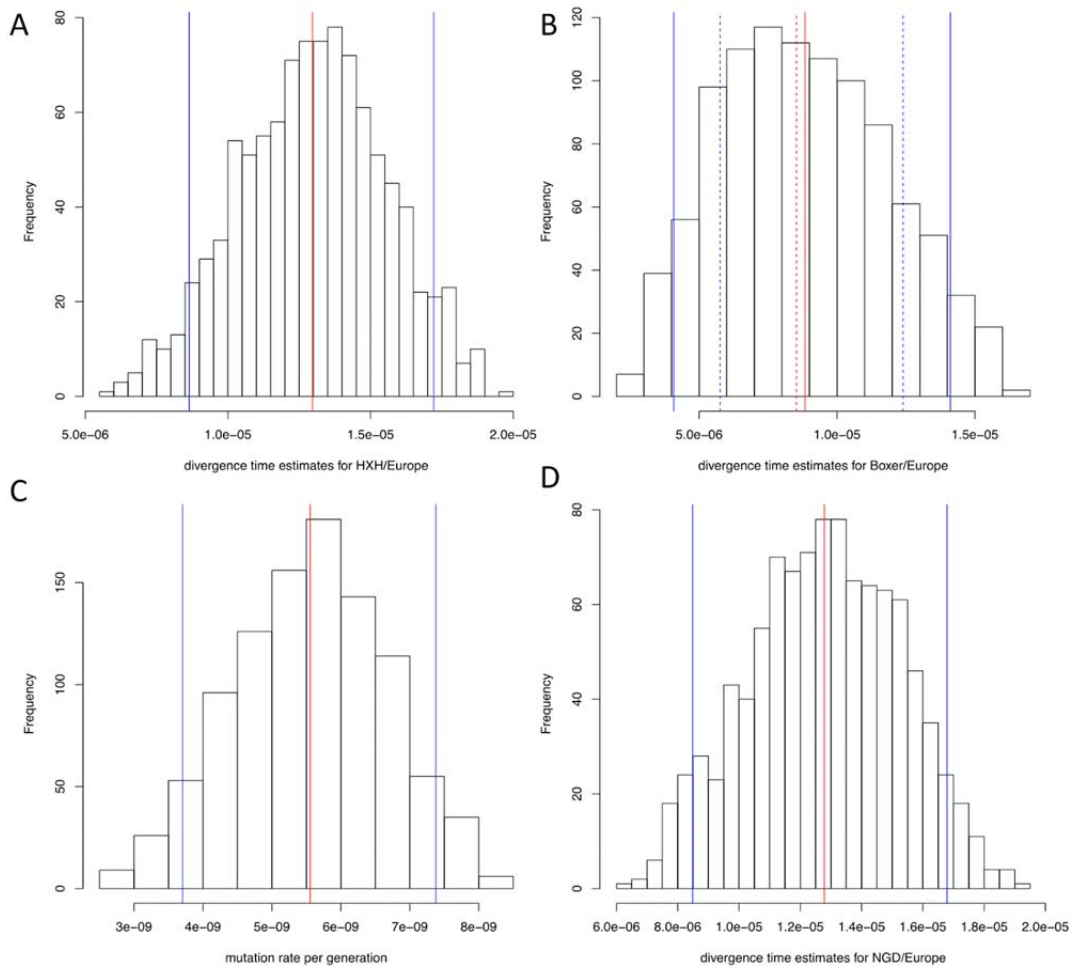

444 **Supplementary Figure 25: Results for numerical analysis.** Red lines indicate mean value and  
445 blue as confidence intervals. **A)** Inferred divergence time for HXH/Europe. **B)** Inferred  
447 divergence time for boxer/Europe using this method compared to G-PhoCS estimates. dashed  
448 lines are the G-PhoCS estimates. **C)** Inferred upper boundaries for mutation rate when assuming  
449 the divergence time between HXH/Europe must be later than 7,000 years ago. **D)** Inferred  
450 divergence time for NGD/Europe.

451  
452  
453  
454  
455  
456  
457  
458  
459  
460

461  
462 **Supplementary Figure 26**

463  
464

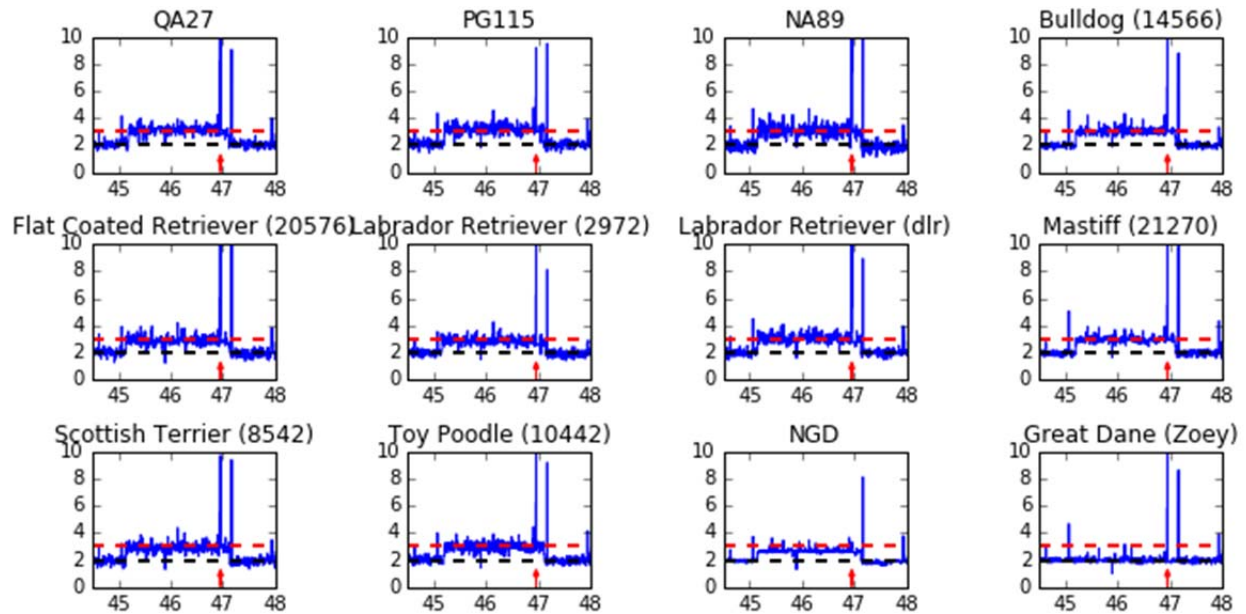

465  
466 **Supplementary Figure 26: Evidence of a large segmental duplication encompassing the**  
467 ***AMY2B* locus.** For each sample, estimated copy number (y-axis) is plotted in 3kb windows (blue  
468 line) along chromosome 6 (x-axis, in Mb). The dashed black line corresponds to a diploid copy  
469 number of 2 while the dashed red line corresponds to a diploid copy number of 3. The red arrow  
470 indicates the position of the the *AMY2B* locus. Eleven of the samples contain the extended  
471 duplication at this locus, whereas the Great Dane (Zoey) contains greatly increased *AMY2B*  
472 copy-number but lacks the segmental duplication. A single window distal to the duplication  
473 shows a high level of copy-number variation among all samples.

474  
475  
476  
477  
478  
479  
480  
481  
482  
483  
484  
485  
486  
487  
488  
489  
490

491  
492  
493  
494  
495

**Supplementary Figure 27**

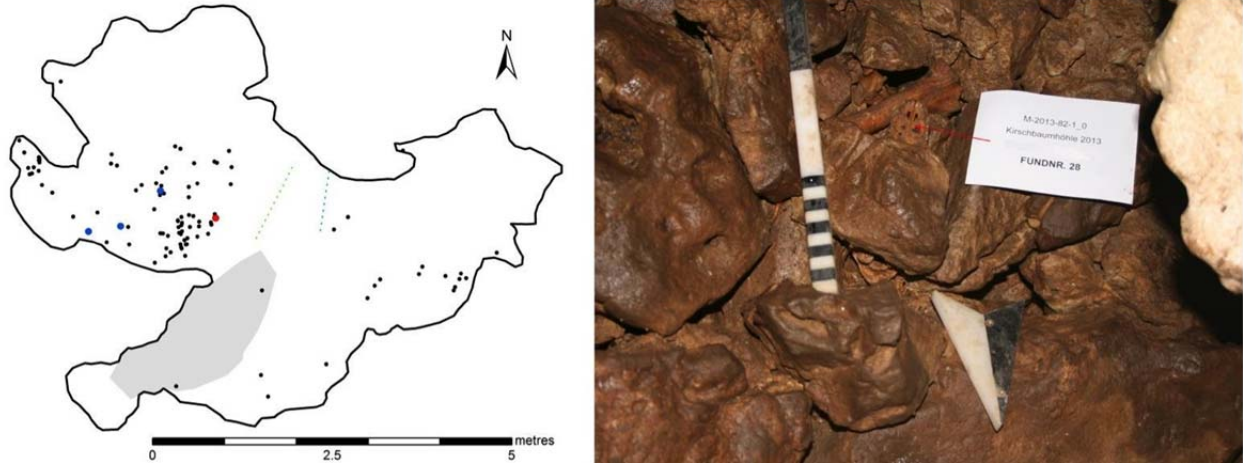

496  
497

**Supplementary Figure 27:** *Left:* Ground plan of the “Kirschbaumhöhle” with the Bone Chamber in the western part of the cave. Small black dots are bone findings, red large dot is the finding position of CTC dog cranium, blue large dots are human bones (two skulls and one femur) of the same period (End Neolithic between 2,900 and 2,630 BCE cal.). Dashed lines are the present entrances into the Bone Chamber (green) and into the Sinter Chamber (blue). *Right:* *In situ* picture of CTC dog cranium in the cave (red arrow) overlaid by a limestone.

504  
505  
506  
507  
508  
509  
510  
511  
512  
513  
514  
515  
516  
517  
518  
519  
520  
521  
522  
523  
524  
525



526  
527  
528  
529

### Supplementary Figure 28

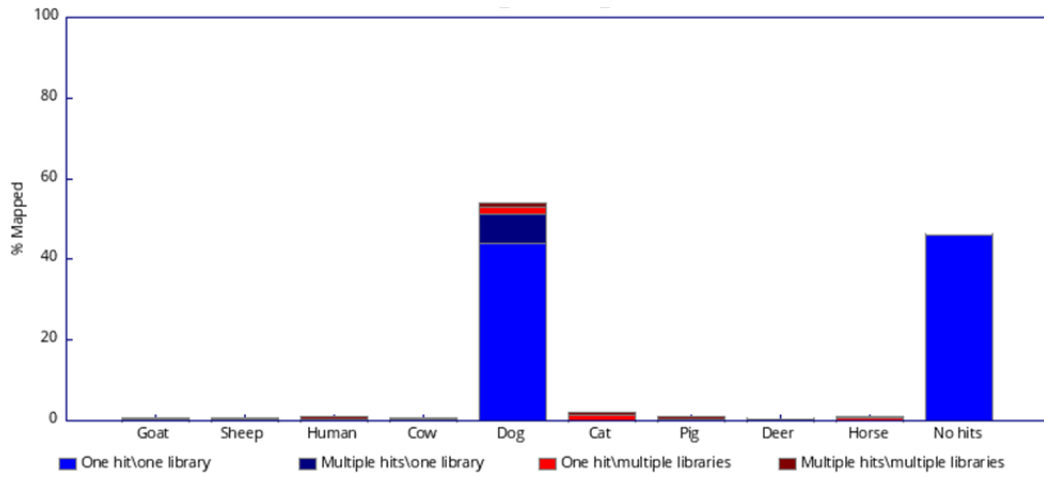

530  
531  
532  
533  
534  
535  
536  
537  
538  
539  
540  
541  
542  
543  
544  
545  
546  
547  
548  
549  
550  
551  
552  
553  
554  
555  
556  
557  
558  
559  
560  
561  
562  
563  
564  
565

### Supplementary Figure 28: Fastq screen output of HXH

566  
567 **Supplementary Figure 29**

568  
569 **A**

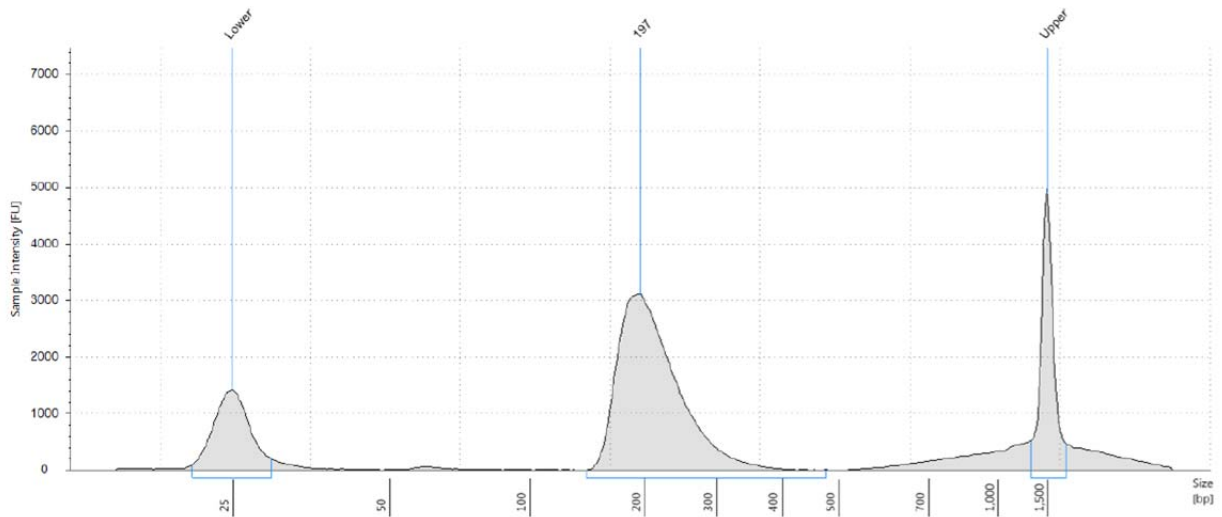

570  
571  
572 **B**

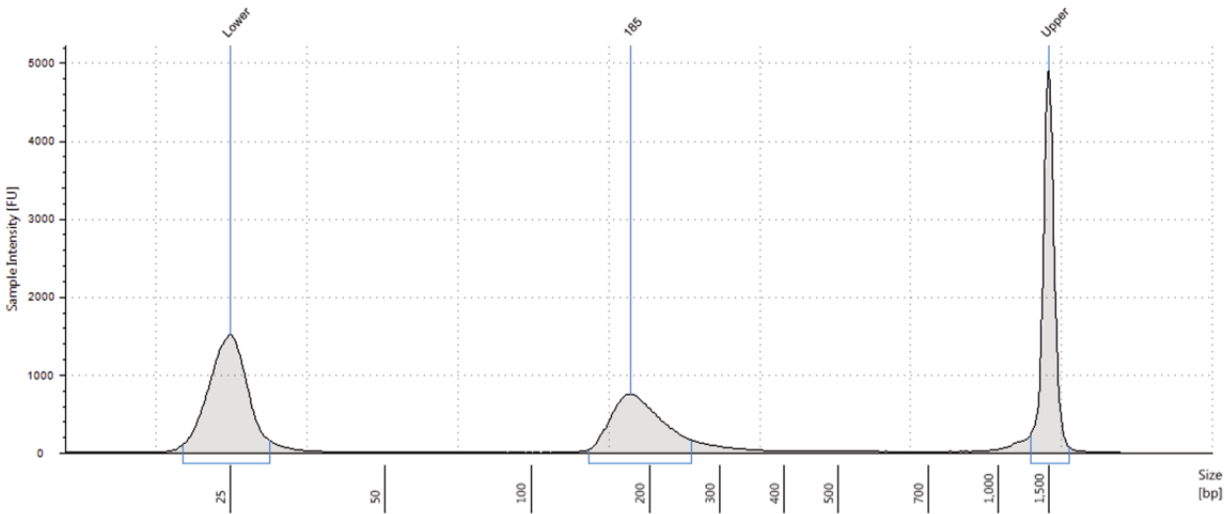

573  
574  
575 **Supplementary Figure 29: Tapestation traces of sample Hxh10a (HXH). A) PCR used for**  
576 **MiSeq screening, B) Pool of 19 PCRs used for HiSeq sequencing.**

577  
578  
579  
580  
581  
582  
583  
584  
585

586  
587  
588

**Supplementary Figure 30**

589

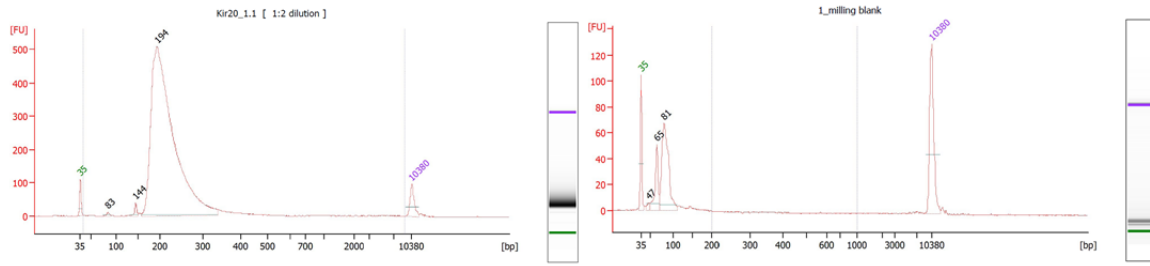

590

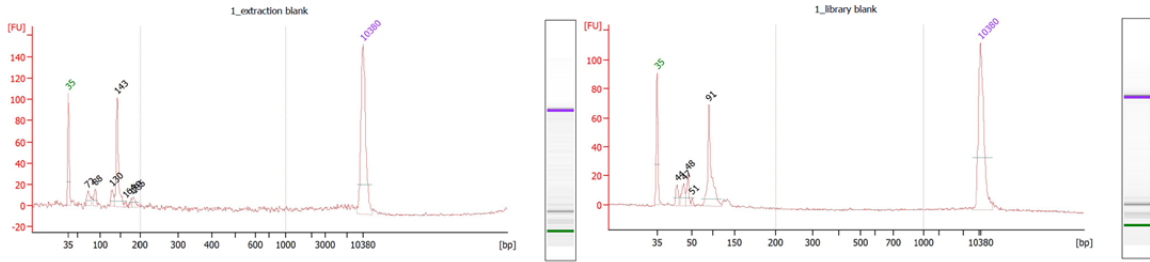

591

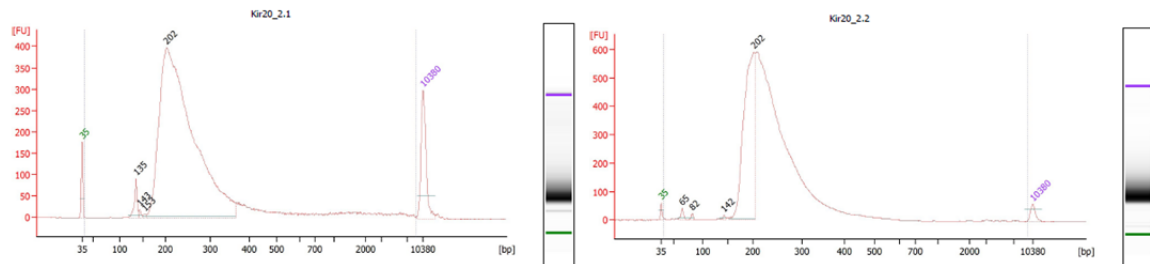

592

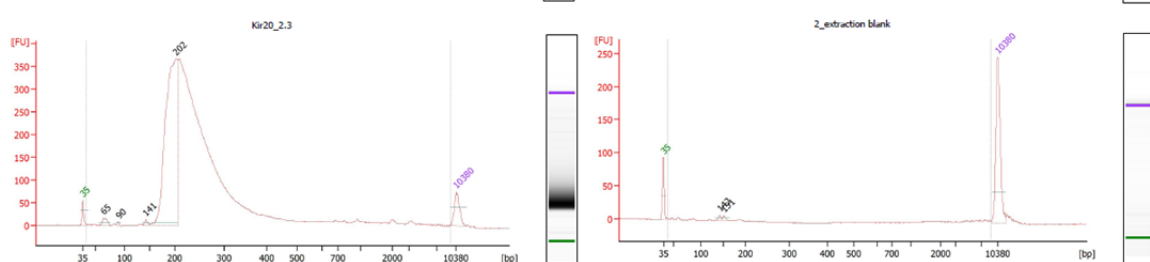

593

594

595

596

597

598

599

600

601

602

603

604

605

606

**Supplementary Figure 30: Bioanalyzer measurements.** Measurements for all sequenced libraries and corresponding blank controls of sample Kir20 (CTC). Labelling according to Supplementary Table 22.

607  
608 **Supplementary Figure 31**  
609

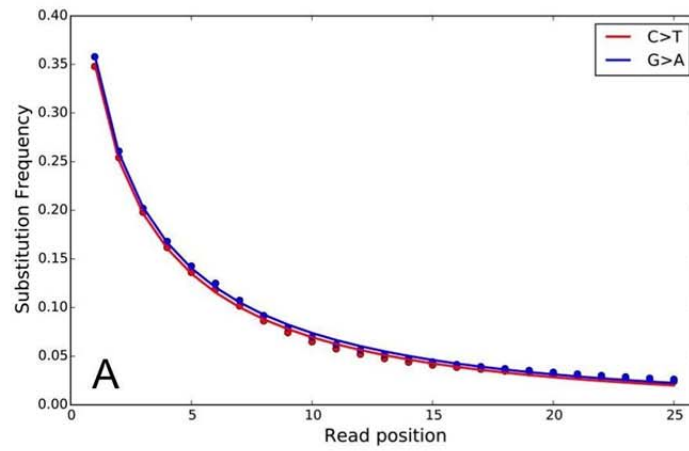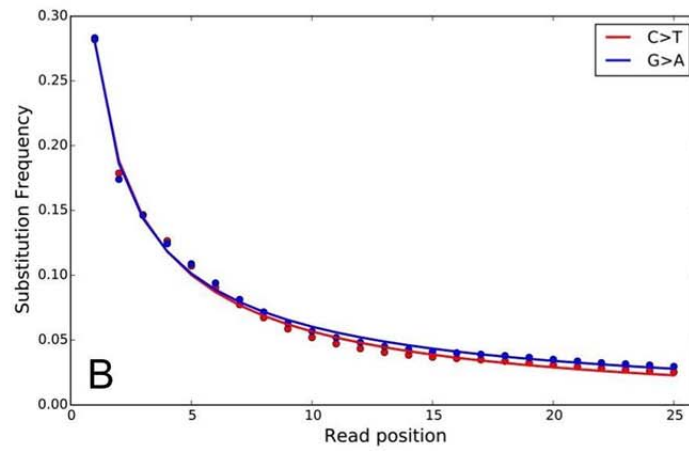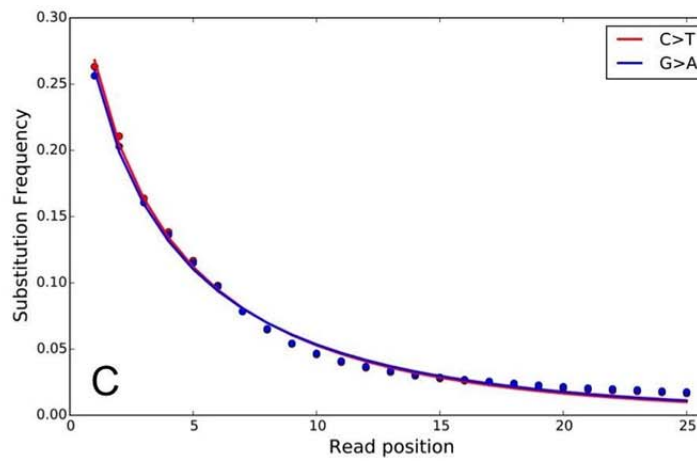

610 **Supplementary Figure 31: Weibull function fit of the frequency of the base substitution**  
611 **along the read. A) HXH B) CTC and C) NGD**  
612

613  
614

615  
616  
617

**Supplementary Figure 32**

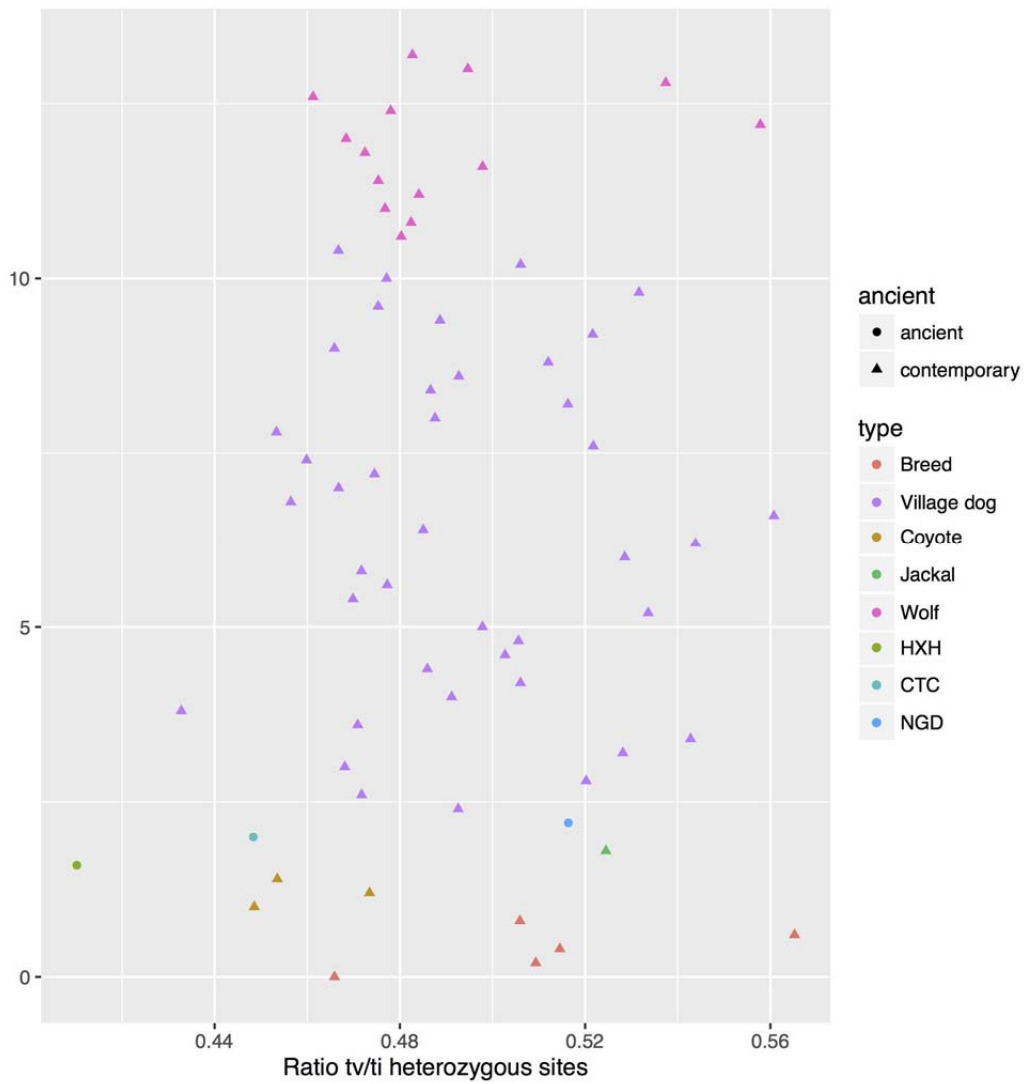

618  
619  
620  
621  
622  
623  
624  
625  
626  
627  
628  
629  
630  
631  
632

**Supplementary Figure 32: Transversion/Transition ratio.** Heterozygous sites for modern and ancient canid genomes. Samples are sorted and arranged along the y-axis.

633  
634  
635

**Supplementary Figure 33**

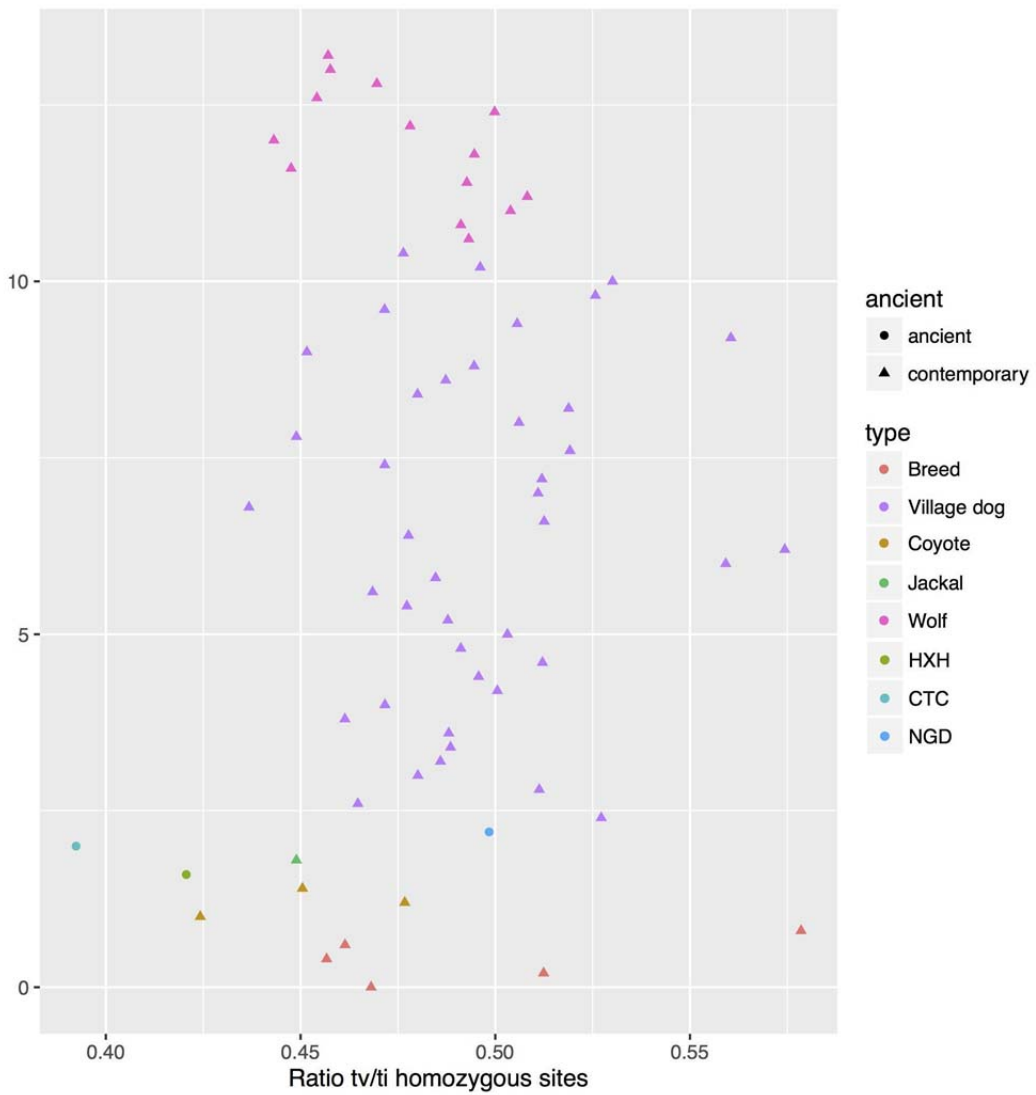

636  
637  
638  
639  
640  
641  
642  
643  
644  
645  
646  
647  
648  
649

**Supplementary Figure 33: Transversion/Transition ratio.** Homozygous sites for modern and ancient canid genomes. Samples are sorted and arranged along the y-axis.

650  
651

### Supplementary Figure 34

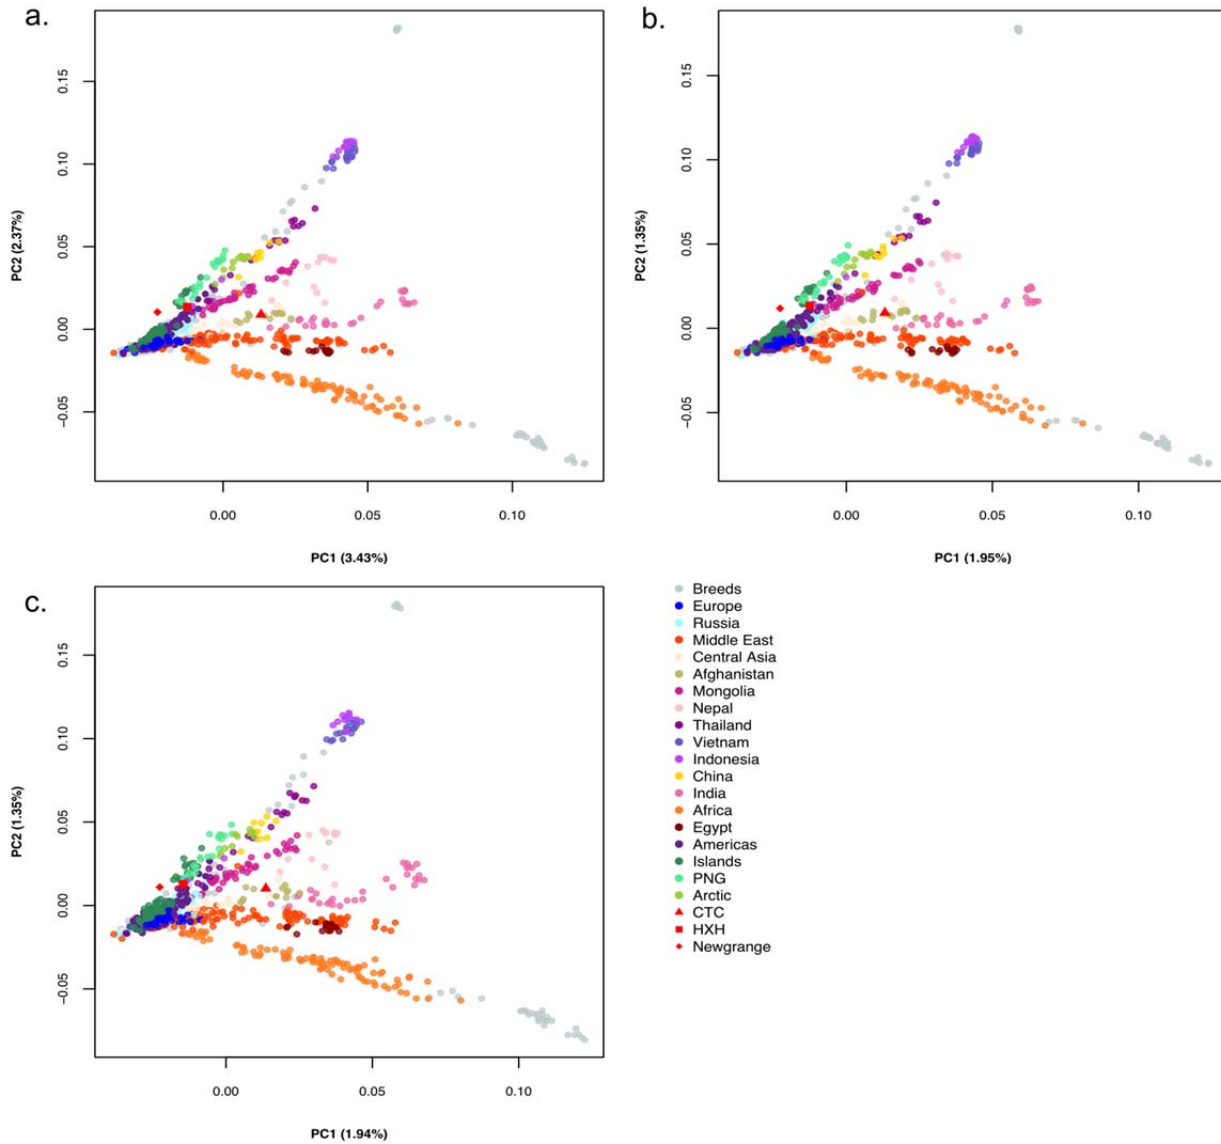

652  
653  
654  
655  
656  
657  
658  
659  
660  
661  
662  
663  
664  
665

**Supplementary Figure 34: PCA Analysis.** Comparison of SNP array data-based PCAs based on a) diploid, b) pseudo-haploid, and c) pseudo-haploid data with C<>T and A<>G sites removed. PC space defined by village dogs, with breed dogs, CTC, HXH, and NGD projected onto the PC space. Village dogs are colored according to geography; breed dogs are light gray; ancient samples are red.

666  
667  
668

### Supplementary Figure 35

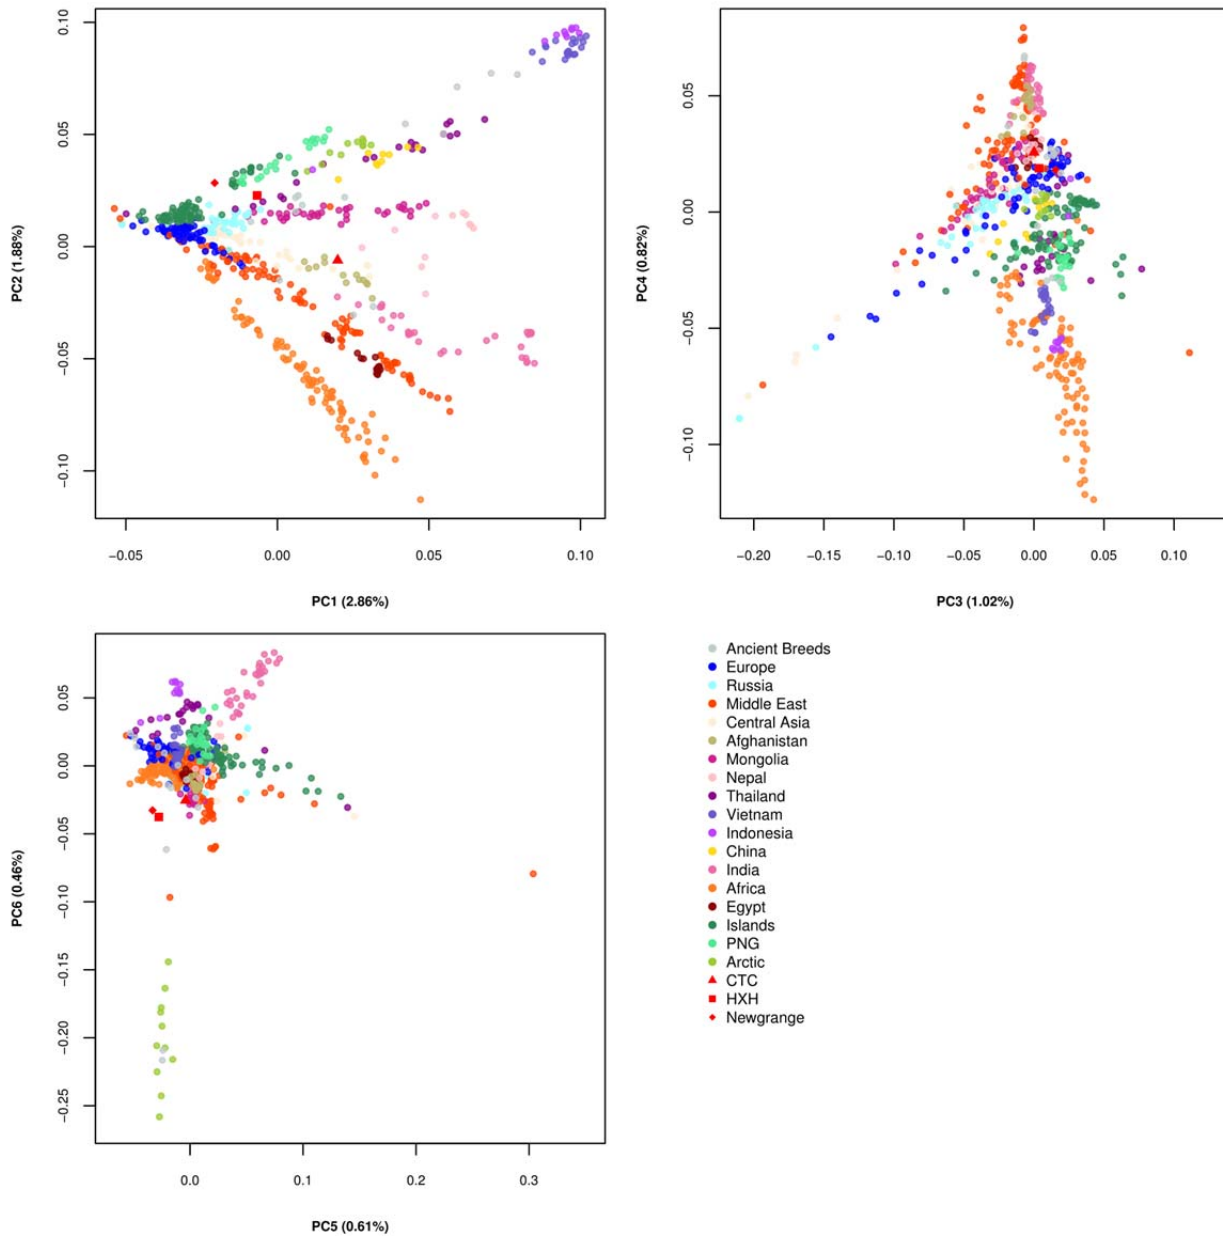

669  
670  
671  
672  
673  
674  
675  
676  
677  
678  
679

**Supplementary Figure 35. PCA Analysis.** PCA of village dogs, with breed dogs, CTC, HXH, and Newgrange dog (NGD) projected onto the PC space using SNP array data. Village dogs are colored according to geography; breed dogs are light gray; ancient samples are red.



680  
681

**Supplementary Figure 36**

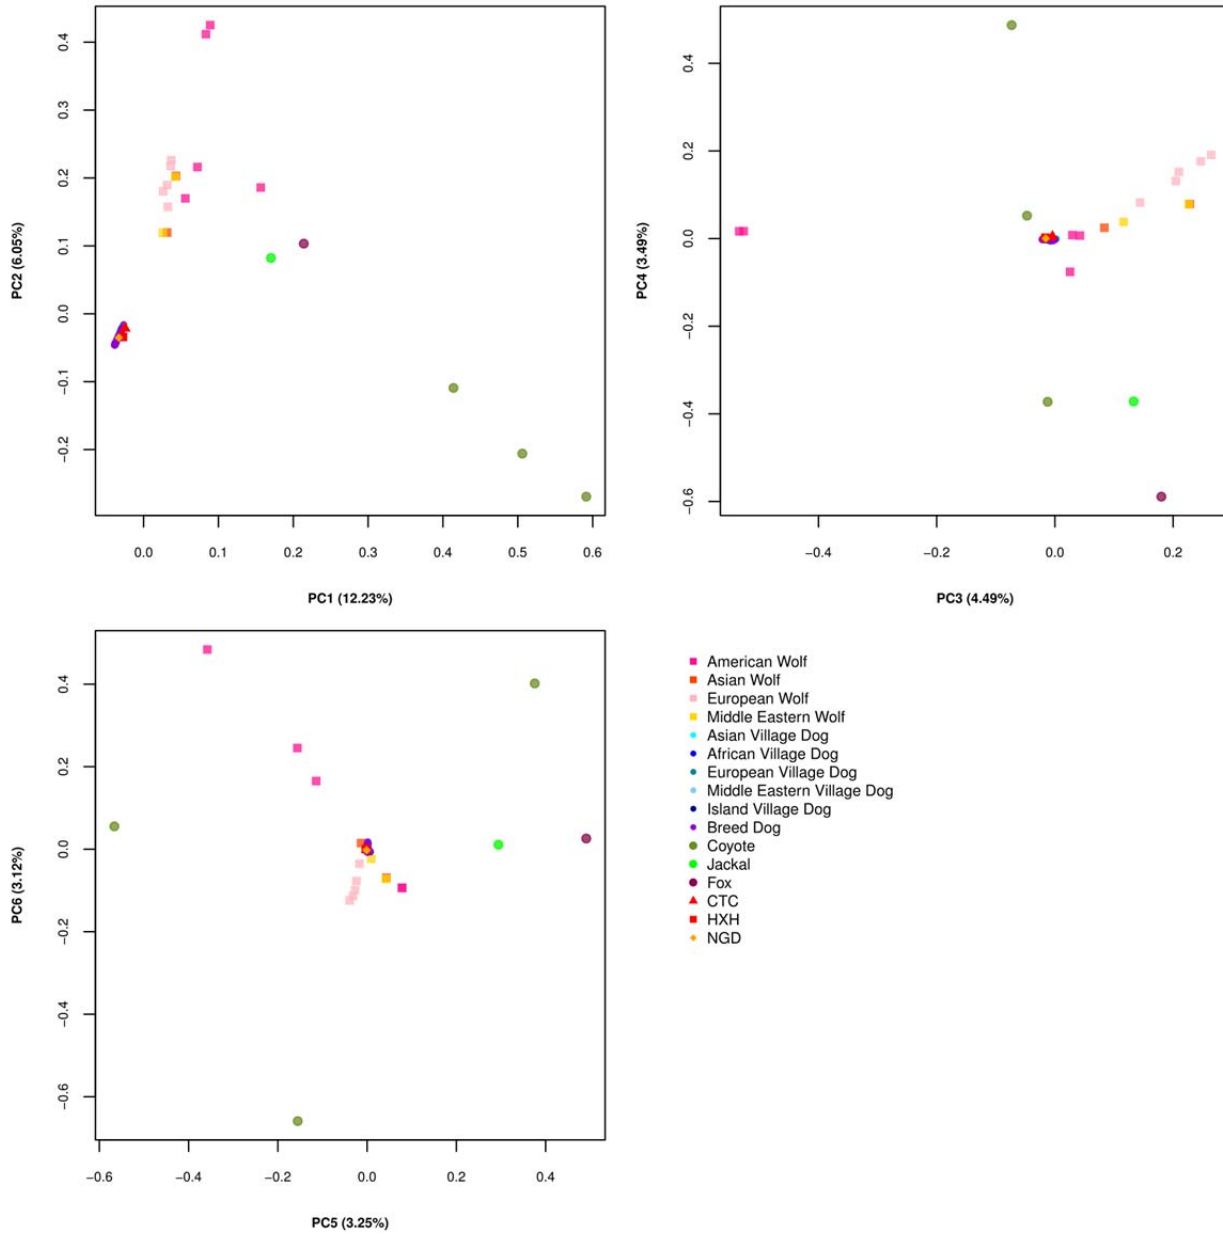

682  
683  
684  
685  
686  
687  
688  
689  
690  
691  
692  
693

**Supplementary Figure 36: PCA analysis.** PCA of coyotes, jackal, fox, gray wolves, village dogs, breed dogs, NGD, CTC, and HXH using the genome sequenced Call set 1. PC space was defined by all samples.

694  
695  
696

### Supplementary Figure 37

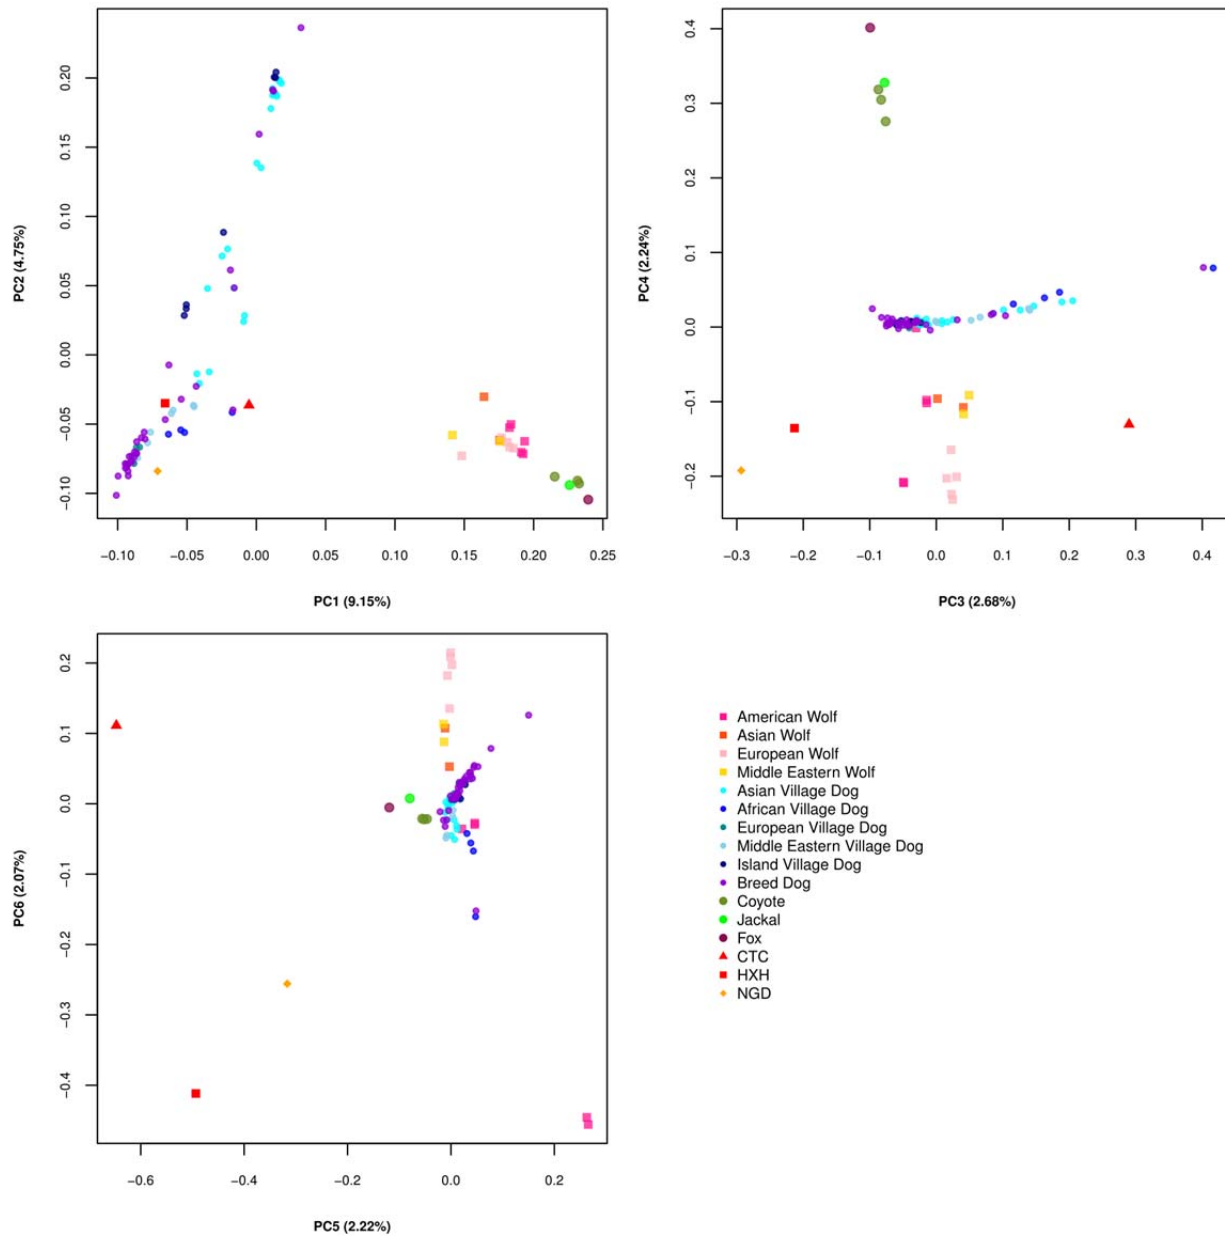

697  
698  
699  
700  
701  
702  
703  
704  
705  
706  
707

**Supplementary Figure 37: PCA analysis.** PCA of coyotes, jackal, fox, gray wolves, village dogs, breed dogs, NGD, CTC, and HXH using the genome sequenced Call set 2. PC space was defined by all samples.

708  
709  
710

**Supplementary Figure 38**

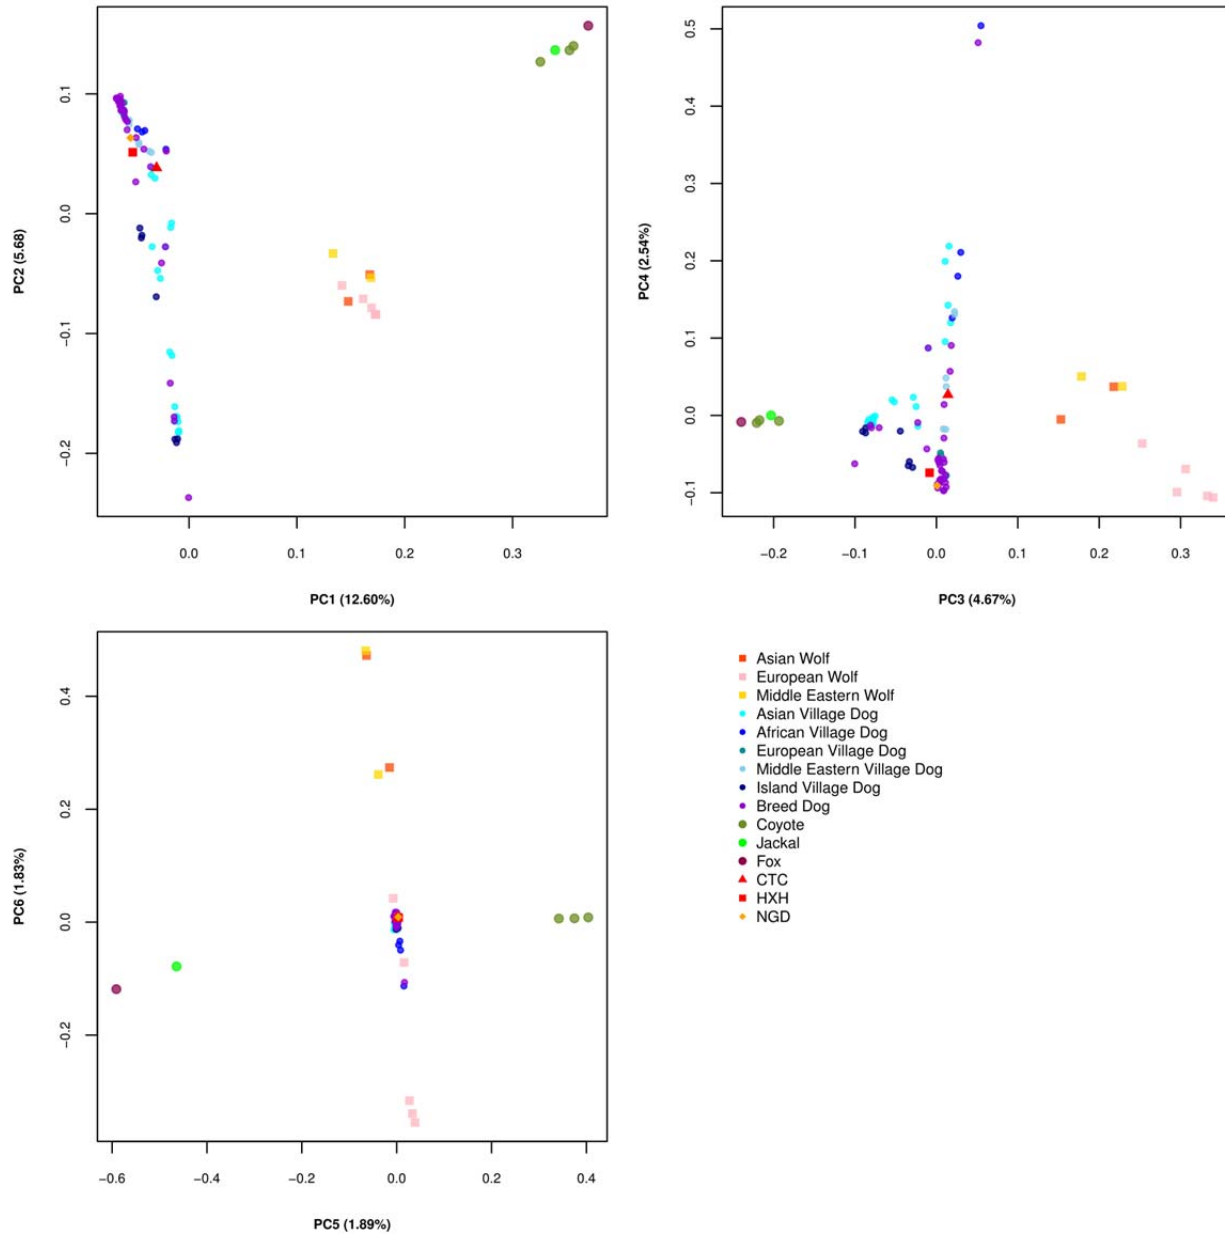

711  
712  
713  
714  
715  
716  
717  
718  
719  
720  
721

**Supplementary Figure 38: PCA analysis.** PCA of coyotes, jackal, fox, gray wolves (excluding New World wolves), village dogs, breed dogs, NGD, CTC, and HXH using the genome sequenced Call set 3. PC space was defined by all samples.

722  
723

**Supplementary Figure 39**

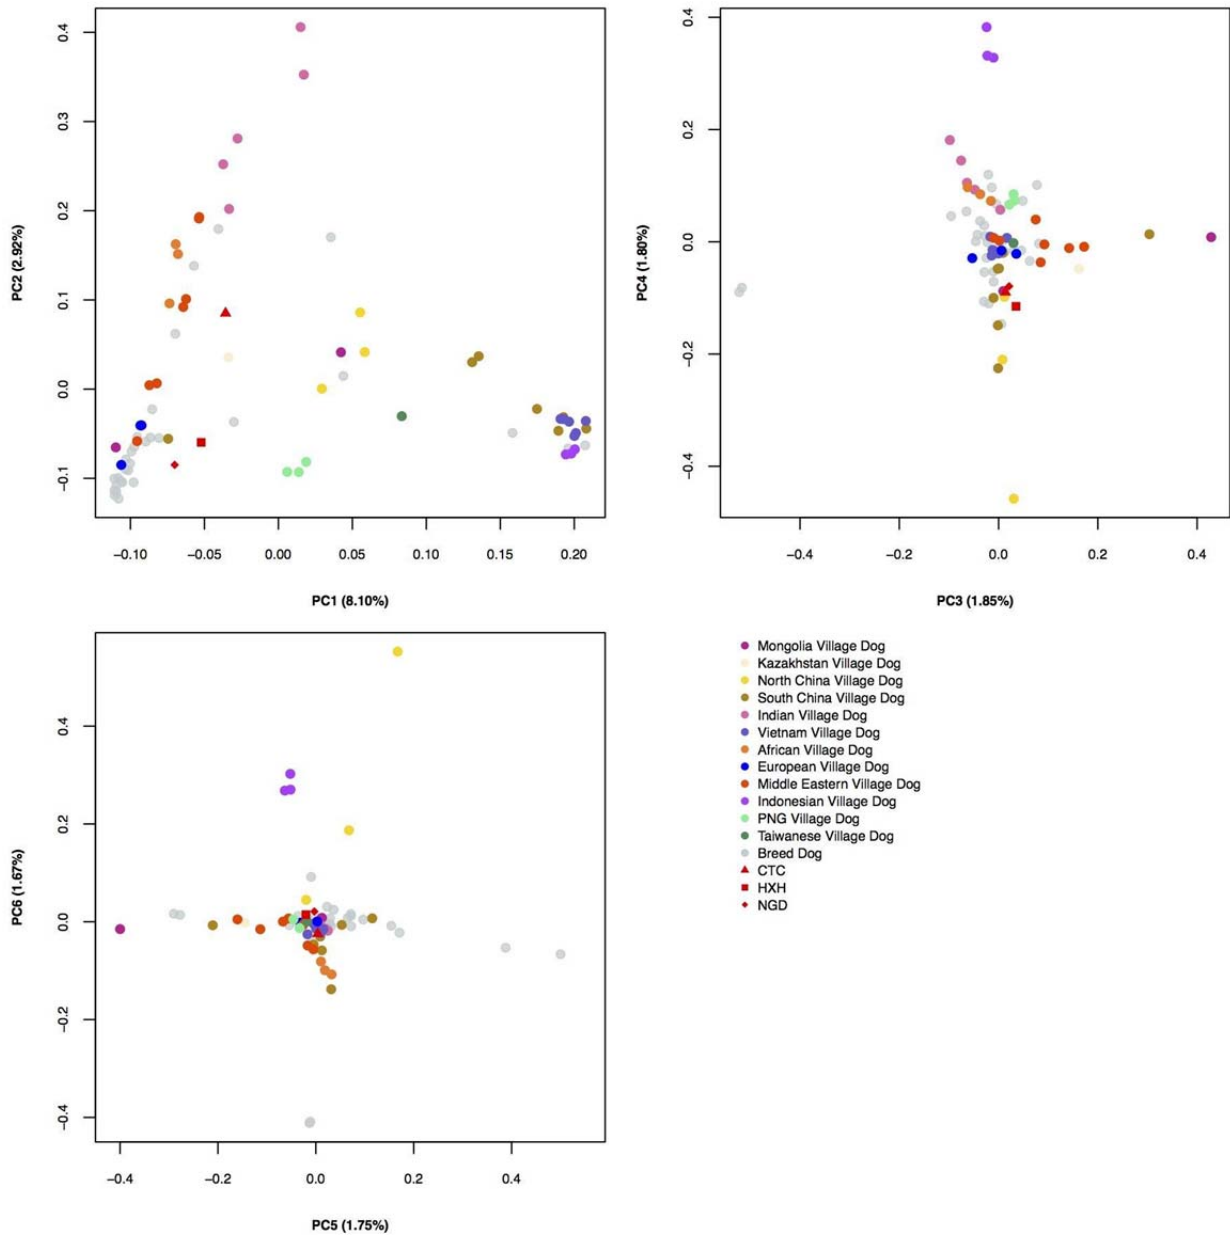

724  
725  
726  
727  
728  
729  
730  
731  
732  
733  
734  
735

**Supplementary Figure 39: PCA analysis.** PCA of village dogs, breed dogs, NGD, CTC, and HXH using the genome sequenced Call set 1. PC space was defined by all samples.

736  
737  
738

### Supplementary Figure 40

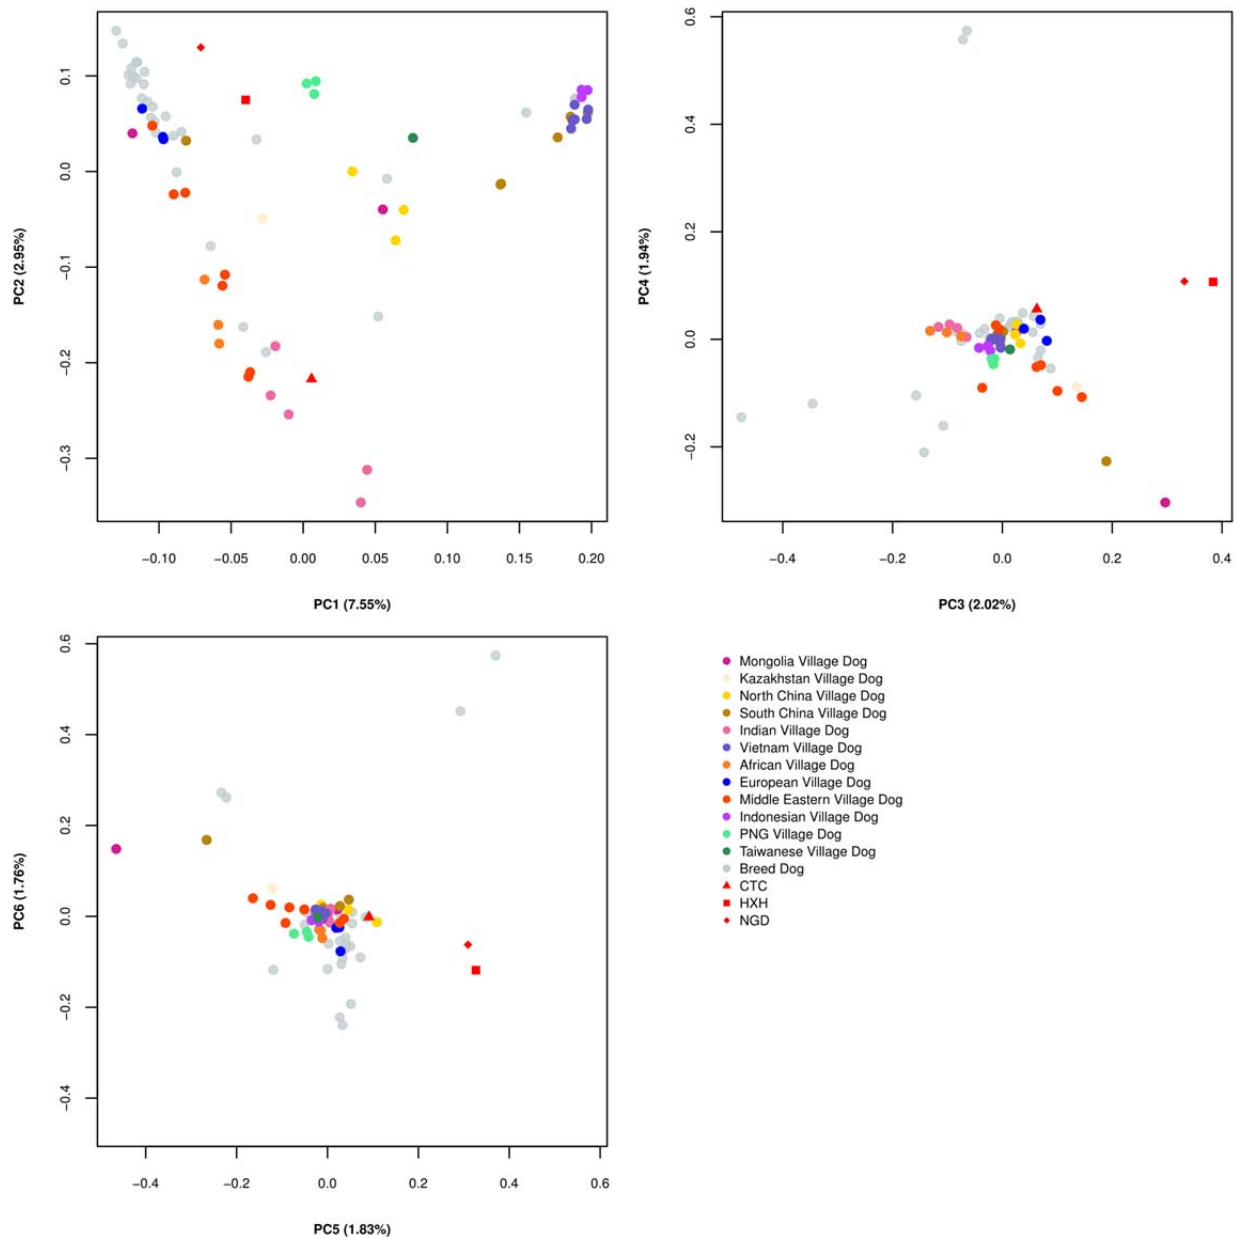

739  
740  
741  
742  
743  
744  
745  
746  
747  
748  
749

**Supplementary Figure 40: PCA analysis.** PCA of village dogs, breed dogs, NGD, CTC, and HXH using the genome sequenced Call set 2. PC space was defined by all samples.

750  
751  
752

### Supplementary Figure 41

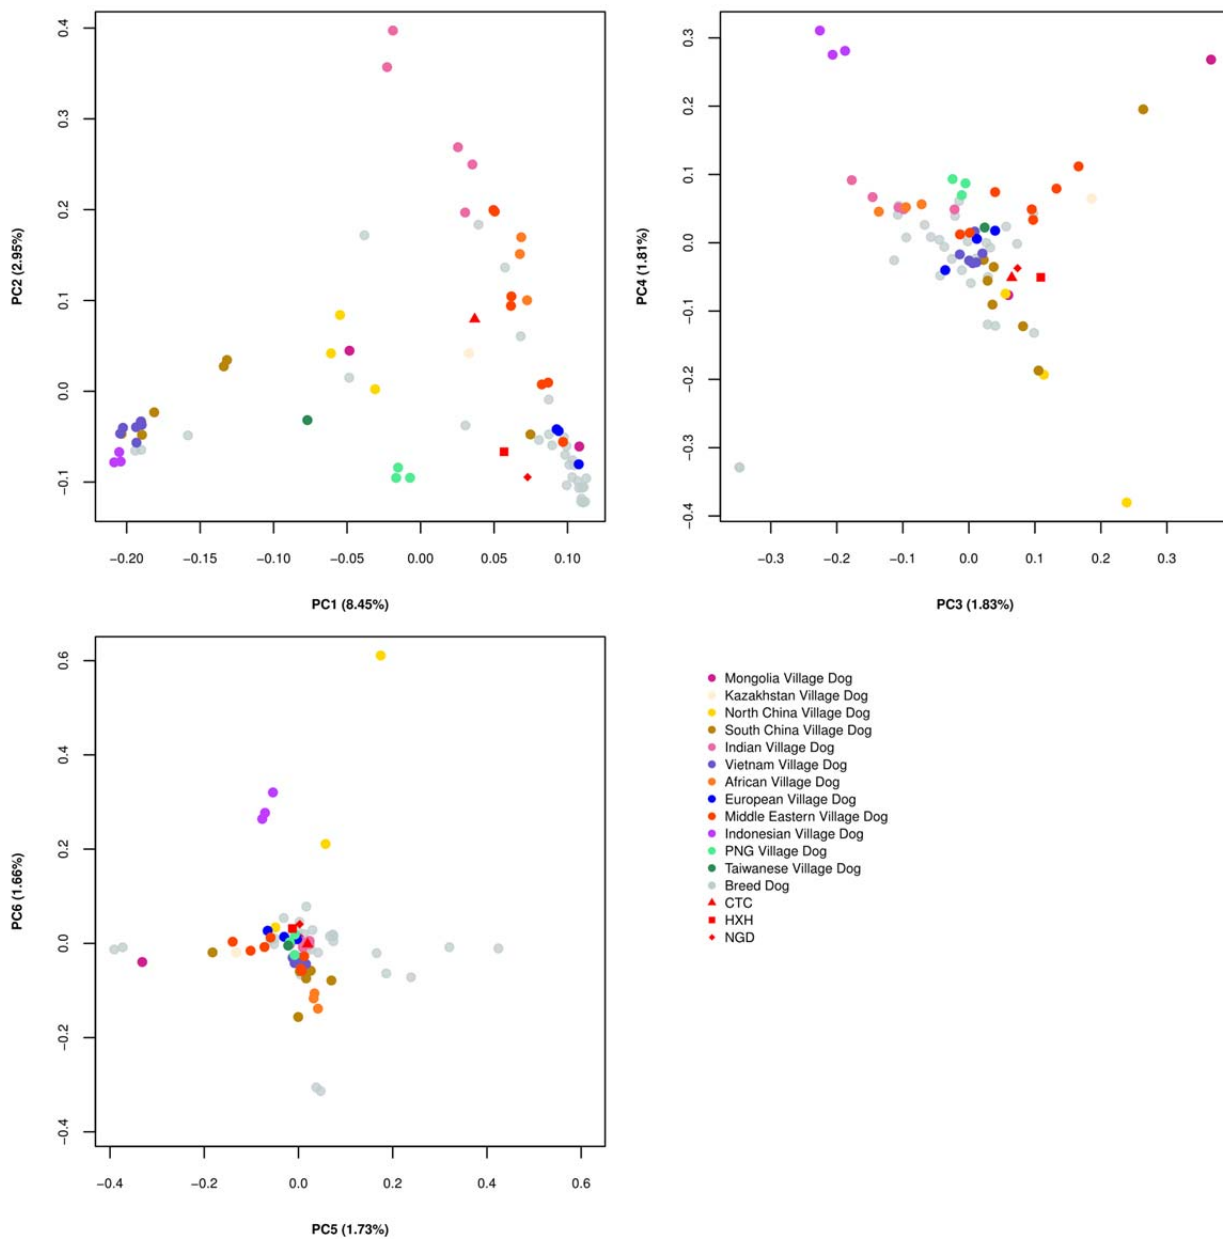

753  
754  
755  
756  
757  
758  
759  
760  
761  
762  
763

**Supplementary Figure 41: PCA analysis.** PCA of village dogs, breed dogs, NGD, CTC, and HXH using the genome sequenced Call set 3. PC space was defined by all samples.

764  
765  
766

**Supplementary Figure 42**

**A)**

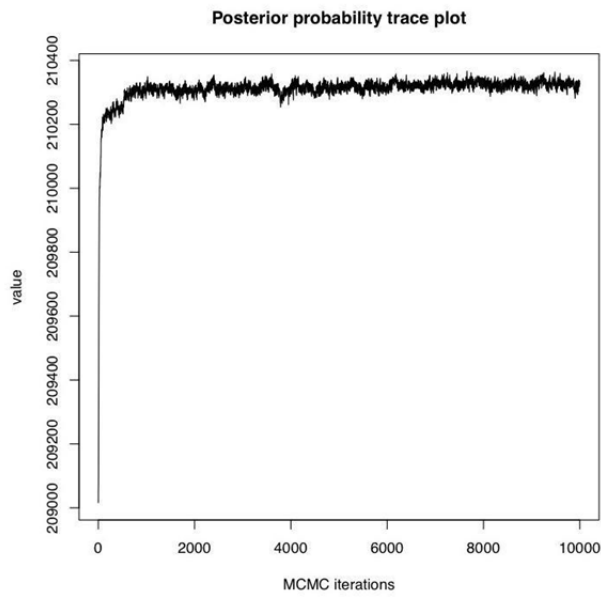

**B)**

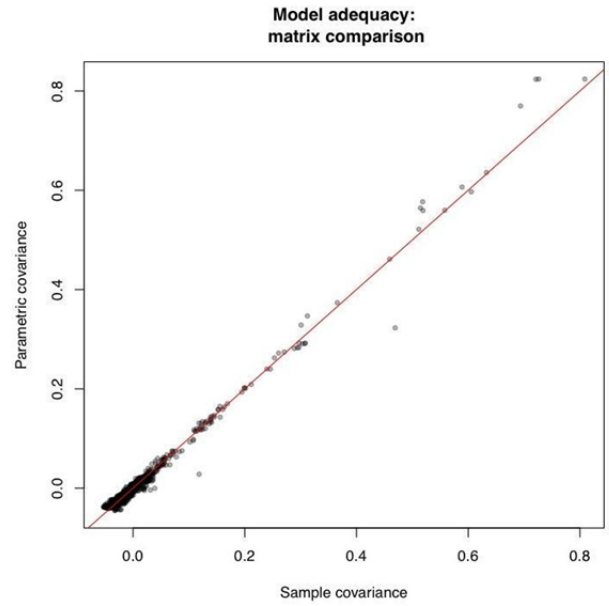

767  
768  
769  
770  
771  
772  
773  
774  
775  
776  
777  
778  
779  
780  
781  
782  
783  
784  
785  
786  
787  
788  
789  
790  
791  
792  
793  
794

**Supplementary Figure 42: Validation of Spacemix run. A)** Stabilization of the posterior probability during MCMC iterations. **B)** Comparison of the parametric and the sample covariance.

795  
796

Supplementary Figure 43

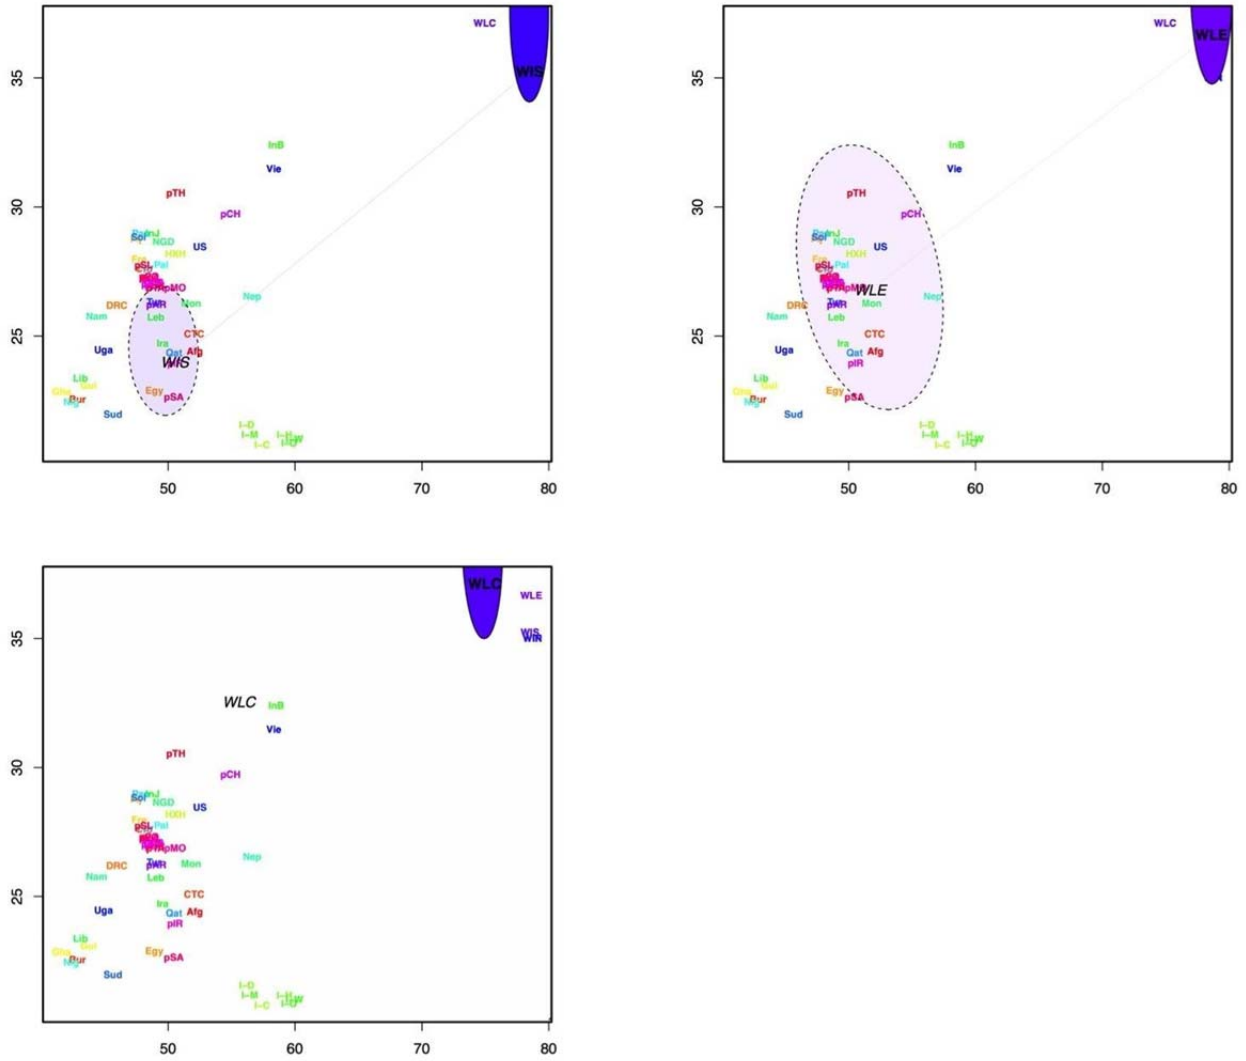

797

798 **Supplementary Figure 43: Spacemix results.** Wolf-dog admixture estimated by SpaceMix

799  
800  
801  
802  
803  
804  
805  
806  
807  
808  
809  
810





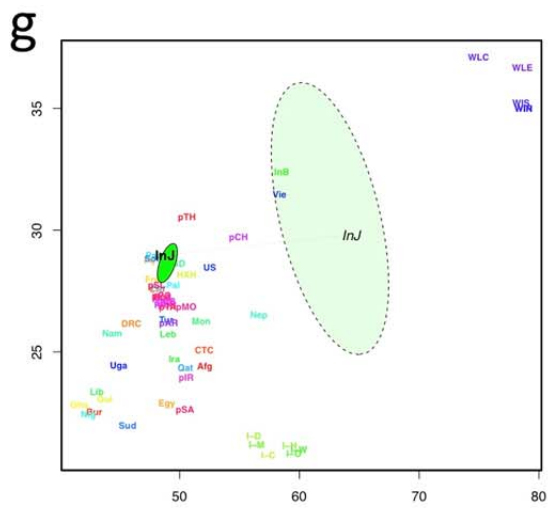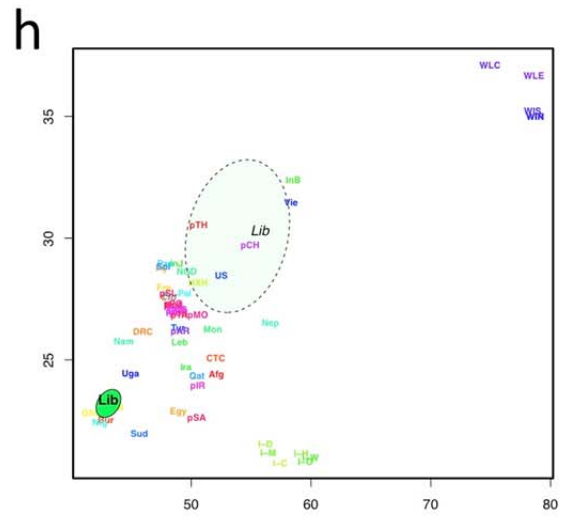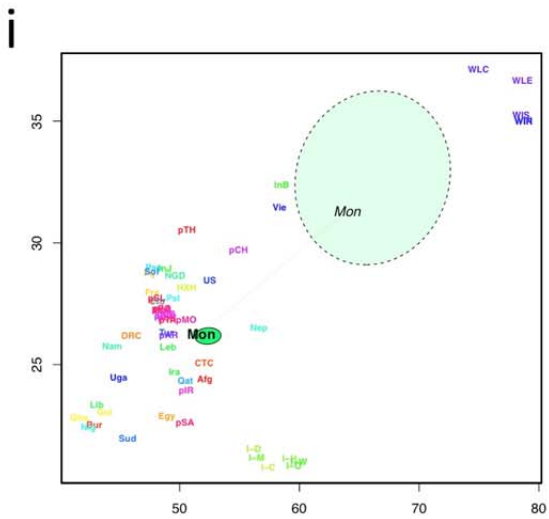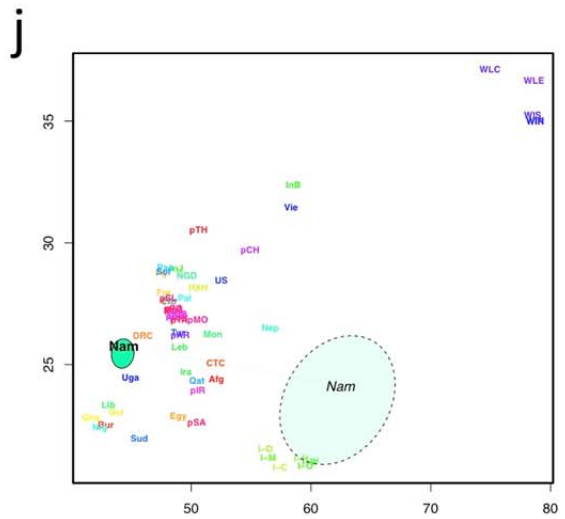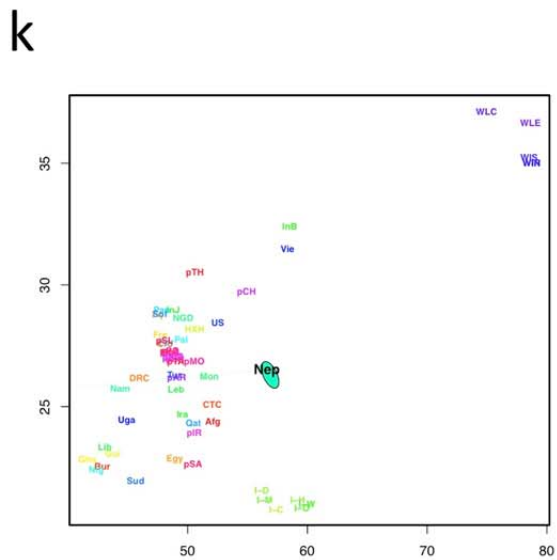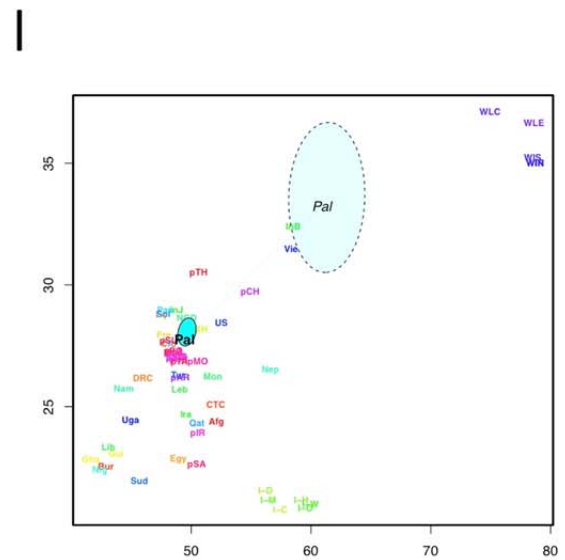

814  
815

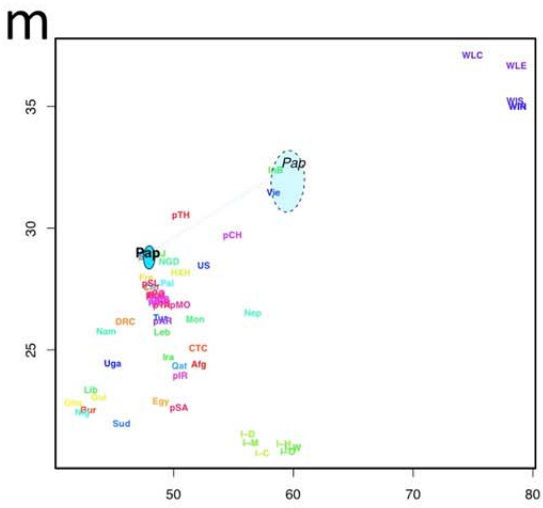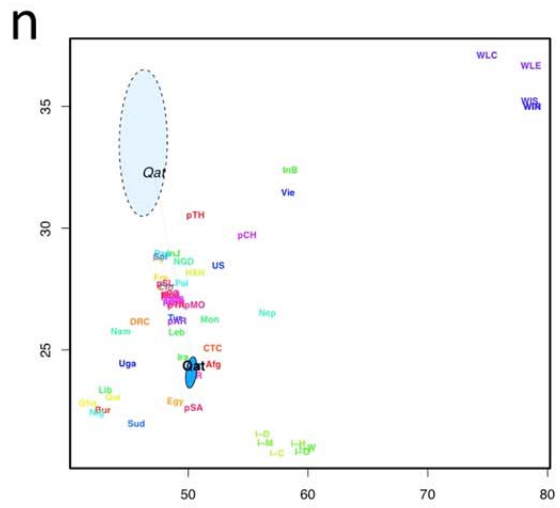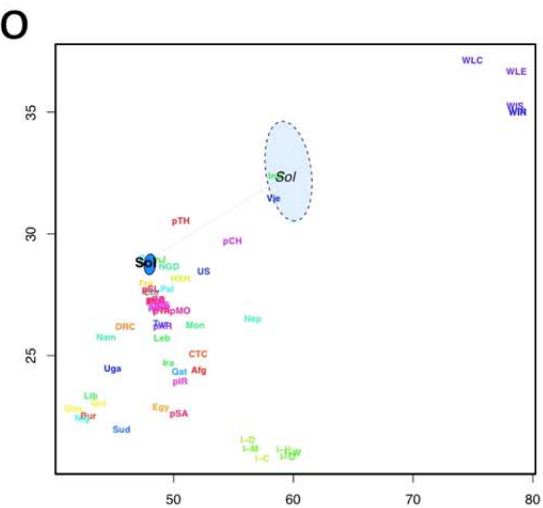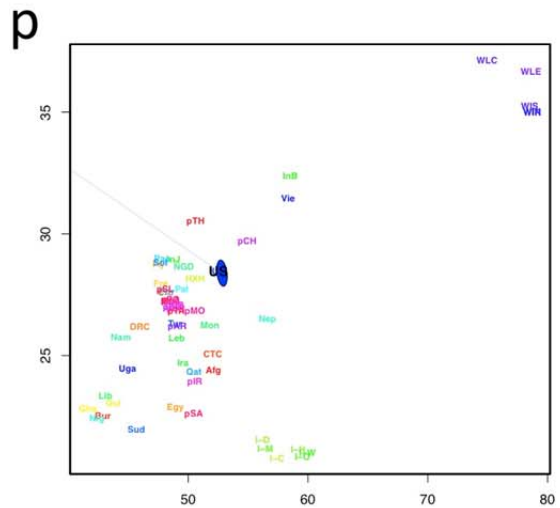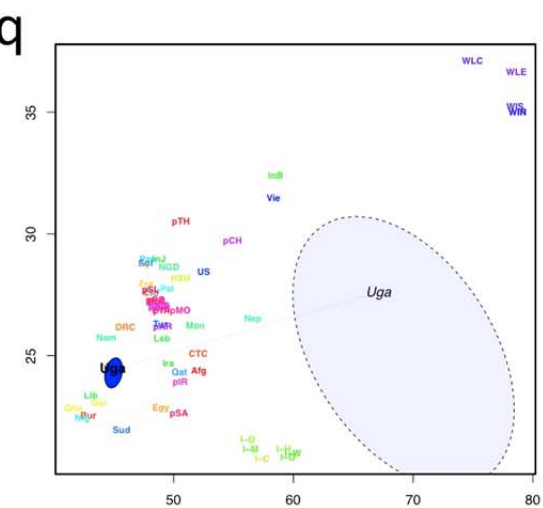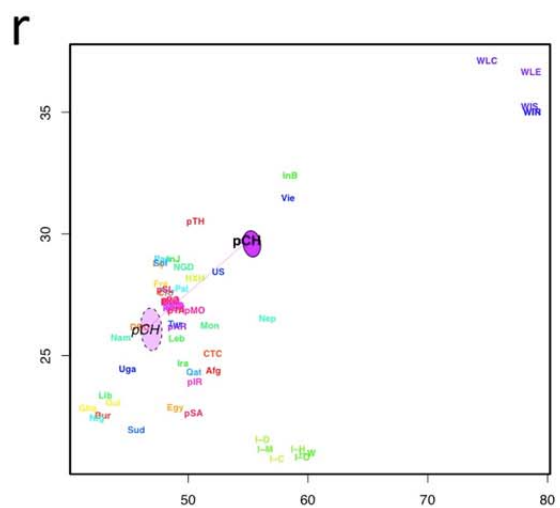

816  
817



834 **Supplementary Figure 45**

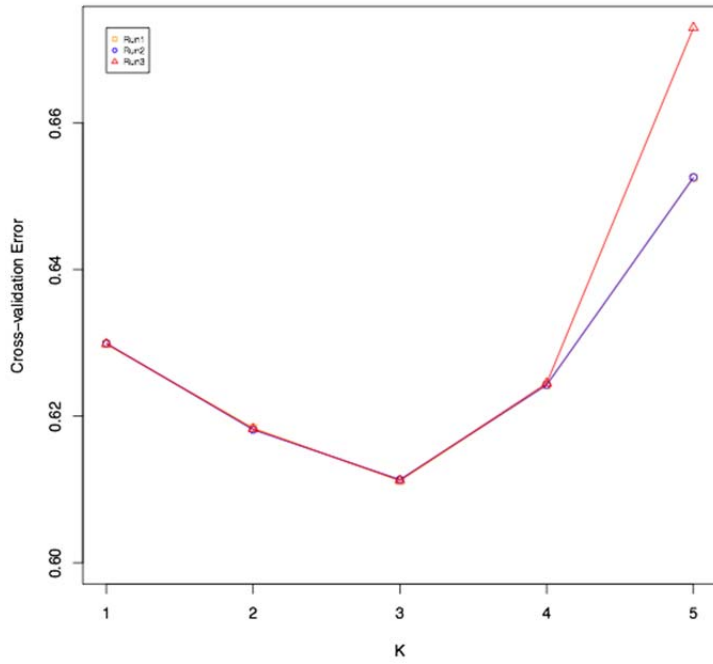

835

836 **Supplementary Figure 45: Admixture results.** Cross-validation errors for  $K$  values 1 through 5  
837 for three separate runs of ADMIXTURE using the SNP array data set

838  
839  
840  
841  
842  
843  
844  
845  
846  
847  
848  
849  
850  
851  
852  
853  
854  
855  
856  
857  
858

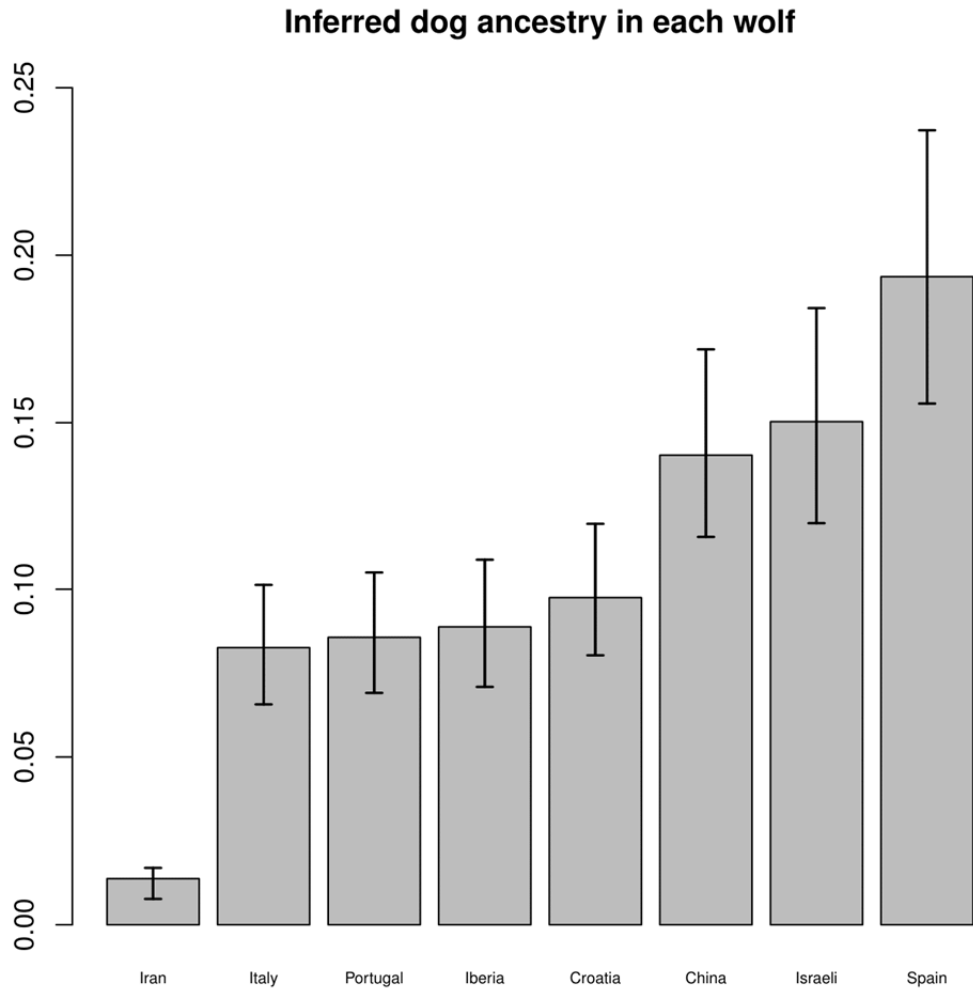

860 **Supplementary Figure 46.** The inferred proportion of dog ancestry in each wolf. The boxplot  
861 shows minimum, mean and maximum.  
862

863  
864  
865  
866  
867  
868  
869  
870  
871  
872  
873  
874  
875

876 **Supplementary Figure 47**

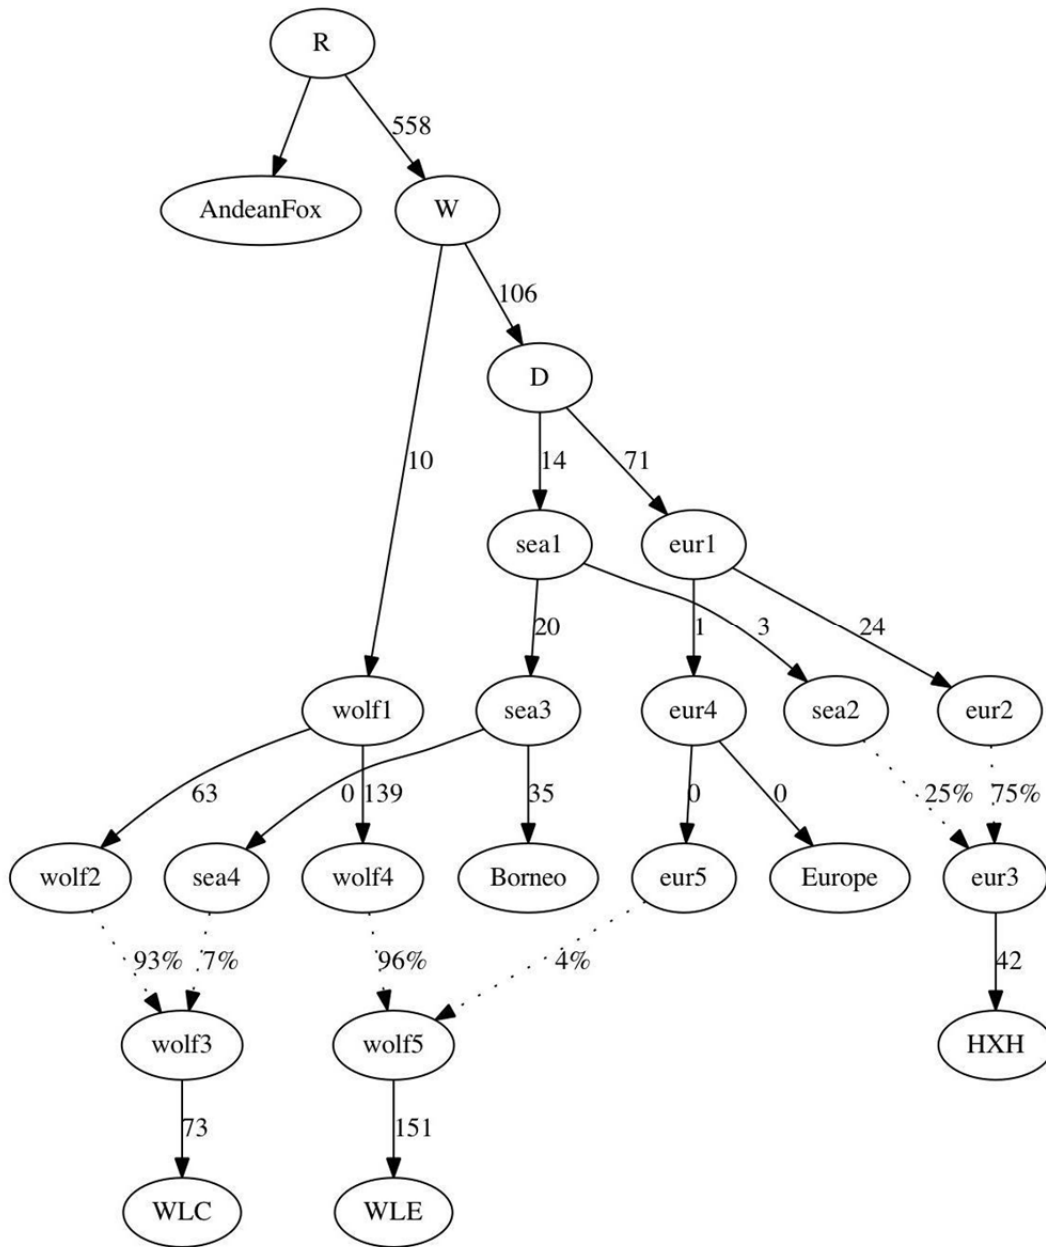

877

878 **Supplementary Figure 47:** Best fit admixture graph for HXH (NGD not shown but is similar)  
 879 when including modern European and Southeast Asian village dogs and wolves.

880  
 881  
 882  
 883  
 884  
 885  
 886

887 **Supplementary Figure 48**  
 888

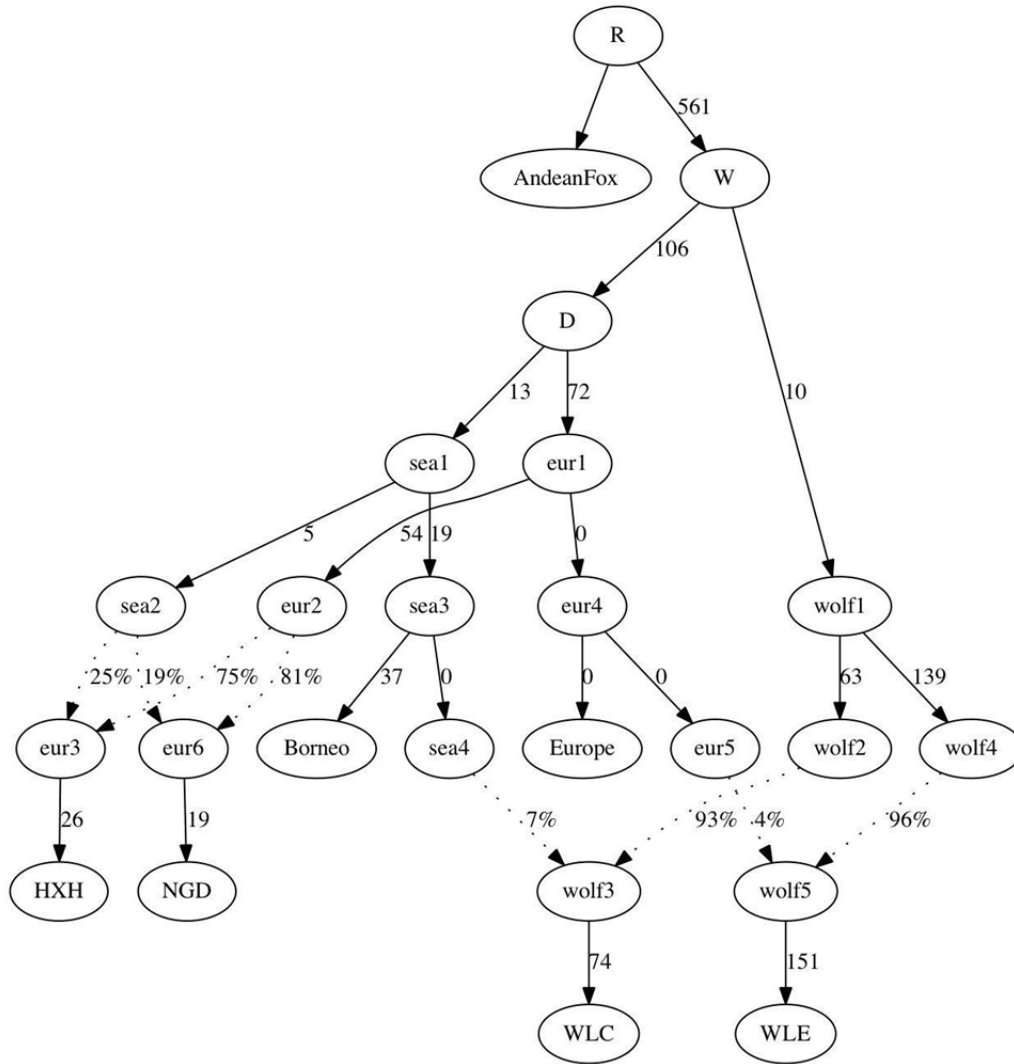

889 **Supplementary Figure 48:** Best fit admixture graph for HXH and NGD when including modern  
 890 European and Southeast Asian village dogs and wolves.  
 891  
 892  
 893  
 894  
 895  
 896  
 897  
 898  
 899  
 900  
 901  
 902  
 903  
 904



905 **Supplementary Figure 49**

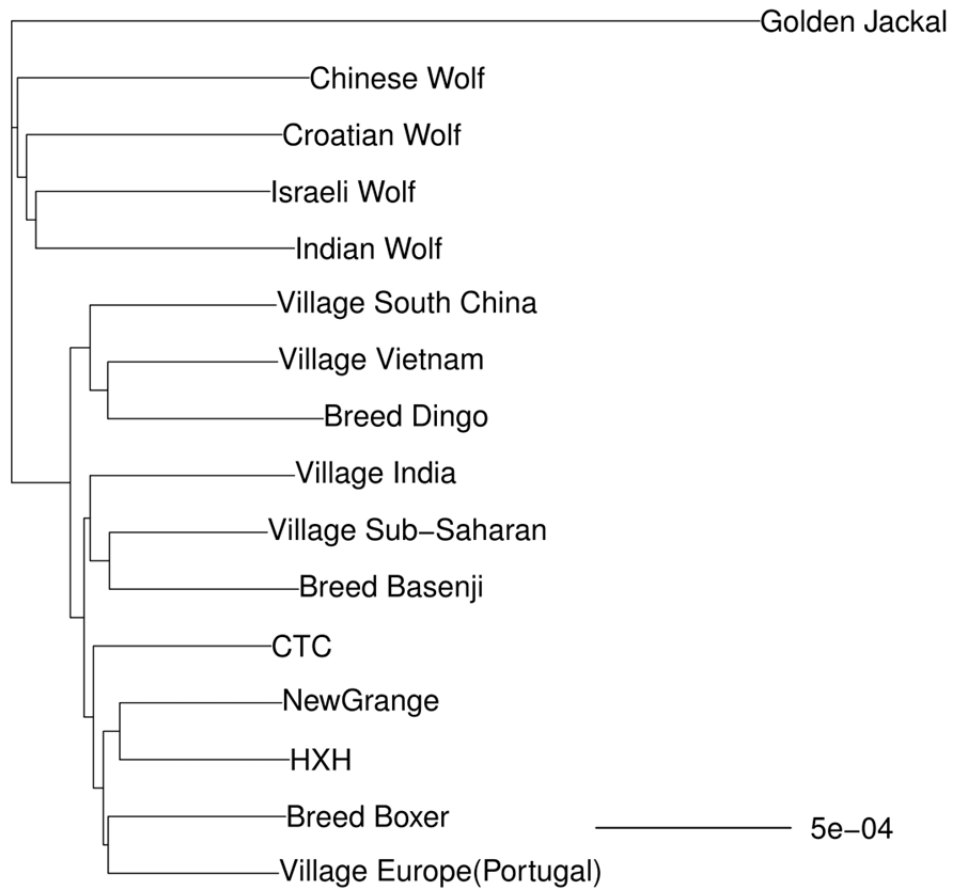

906 **Supplementary Figure 49:** NJ tree based on 16,434 “neutral” loci of selected samples used in  
907 G-PhoCS.  
908

909  
910  
911  
912  
913  
914  
915  
916  
917  
918  
919  
920  
921  
922  
923  
924  
925  
926  
927

928 **Supplementary Figure 50**

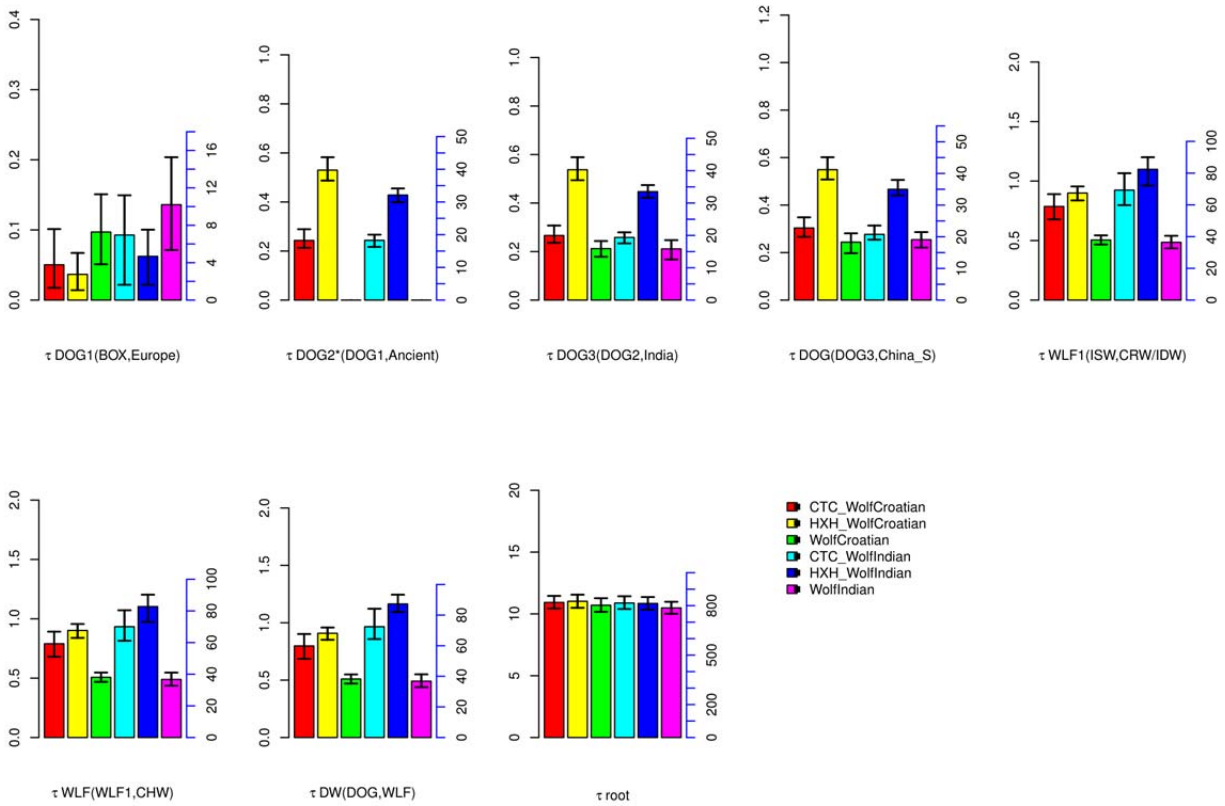

929  
 930 **Supplementary Figure 50:** Divergence time estimates in G-PhoCS analysis when including and  
 931 excluding ancient samples. We use the tree of the form ((((((boxer, Village\_Europe),  
 932 Village\_India), Village\_ChinaS), ((wolfY, IsraeliWolf), ChineseWolf)), GoldenJackal), with or  
 933 without one ancient sample sister to the ancestral of boxer and Village\_Europe: (1) wolfY as  
 934 CroatianWolf, with CTC; (2) wolfY as CroatianWolf, with HXH; (3) wolfY as CroatianWolf, no  
 935 ancient sample; (4) wolfY as IndianWolf, with CTC; (5) wolfY as IndianWolf, with HXH; (6)  
 936 wolfY as IndianWolf, no ancient sample. Raw estimates on the left axis (scaled up by 1e04)  
 937 and calibrated estimates on the right axis (in 1,000 years). This analysis used 5000 randomly selected  
 938 loci.

939  
 940  
 941  
 942  
 943  
 944  
 945  
 946  
 947  
 948  
 949  
 950  
 951

952 **Supplementary Figure 51**

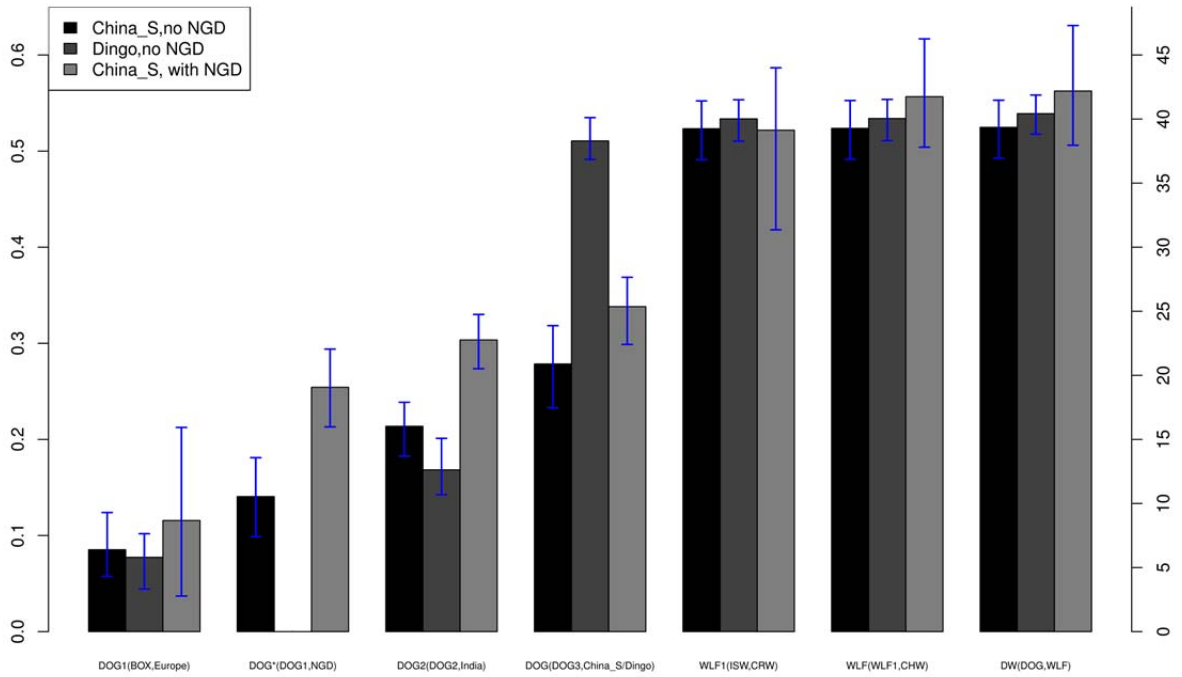

953 **Supplementary Figure 51:** Comparison of divergence time estimates with/without NGD in G-  
 954 PhoCS analysis. We use the tree of the form (((((boxer, Village\_Europe), Village\_India),  
 955 Village\_ChinaS or dingo), ((CroatianWolf, IsraeliWolf), ChineseWolf)), GoldenJackal), with or  
 956 without one ancient sample sister to the ancestral of boxer and Village\_Europe. The divergence  
 957 time for (DOG1,NGD) when NGD is not in G-PhoCS was estimated using a numerical approach  
 958 (See [Supplementary Note 13](#)). Axis on the left are raw estimates, scaled up by 1e04. Axis on the  
 959 right are recalibrated estimates in thousand years, assuming mutation rate  $4 \times 10^{-9}$  per/generation,  
 960 generation time 3 years.  
 961

962  
 963  
 964  
 965  
 966  
 967  
 968  
 969  
 970  
 971  
 972  
 973  
 974  
 975  
 976

977 **Supplementary Figure 52**

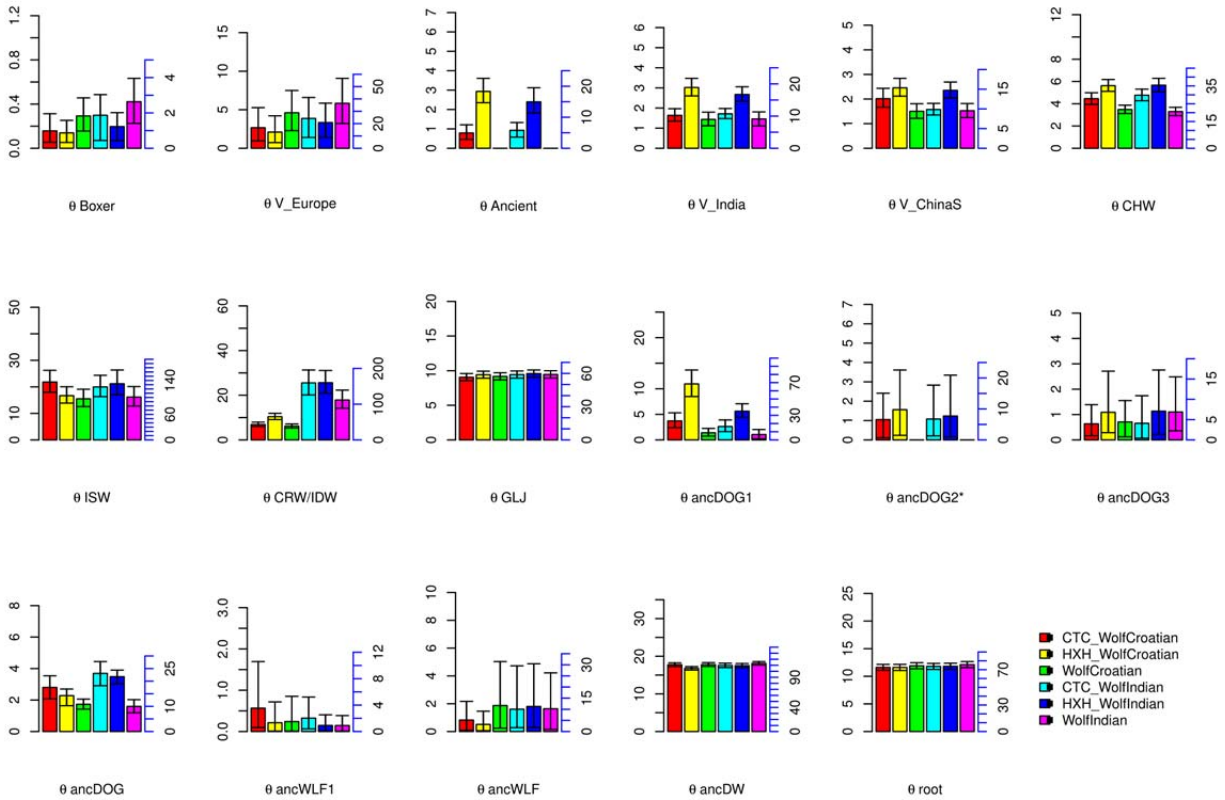

978  
 979 **Supplementary Figure 52:** Population size estimates from G-PhoCS analysis. We use the tree  
 980 in form (((((Boxer, Village\_Europe), Village\_India), Village\_ChinaS), ((wolfY, IsraeliWolf),  
 981 ChineseWolf)), GoldenJackal), with or without one ancient sample sister to the ancestral of  
 982 boxer and Village\_Europe: (1) wolfY as CroatianWolf, with CTC; (2) wolfY as CroatianWolf,  
 983 with HXH; (3) wolfY as CroatianWolf, no ancient sample; (4) wolfY as IndianWolf, with CTC;  
 984 (5) wolfY as IndianWolf, with HXH; (6) wolfY as IndianWolf, no ancient sample. Raw  
 985 estimates on the left axis (scaled up by  $1 \times 10^4$ ) and calibrated estimates on the right axis (in  
 986 thousands of individuals). This analysis used 5,000 randomly selected loci.

987  
 988  
 989  
 990  
 991  
 992  
 993  
 994  
 995  
 996  
 997  
 998  
 999  
 1000

1001 **Supplementary Figure 53**

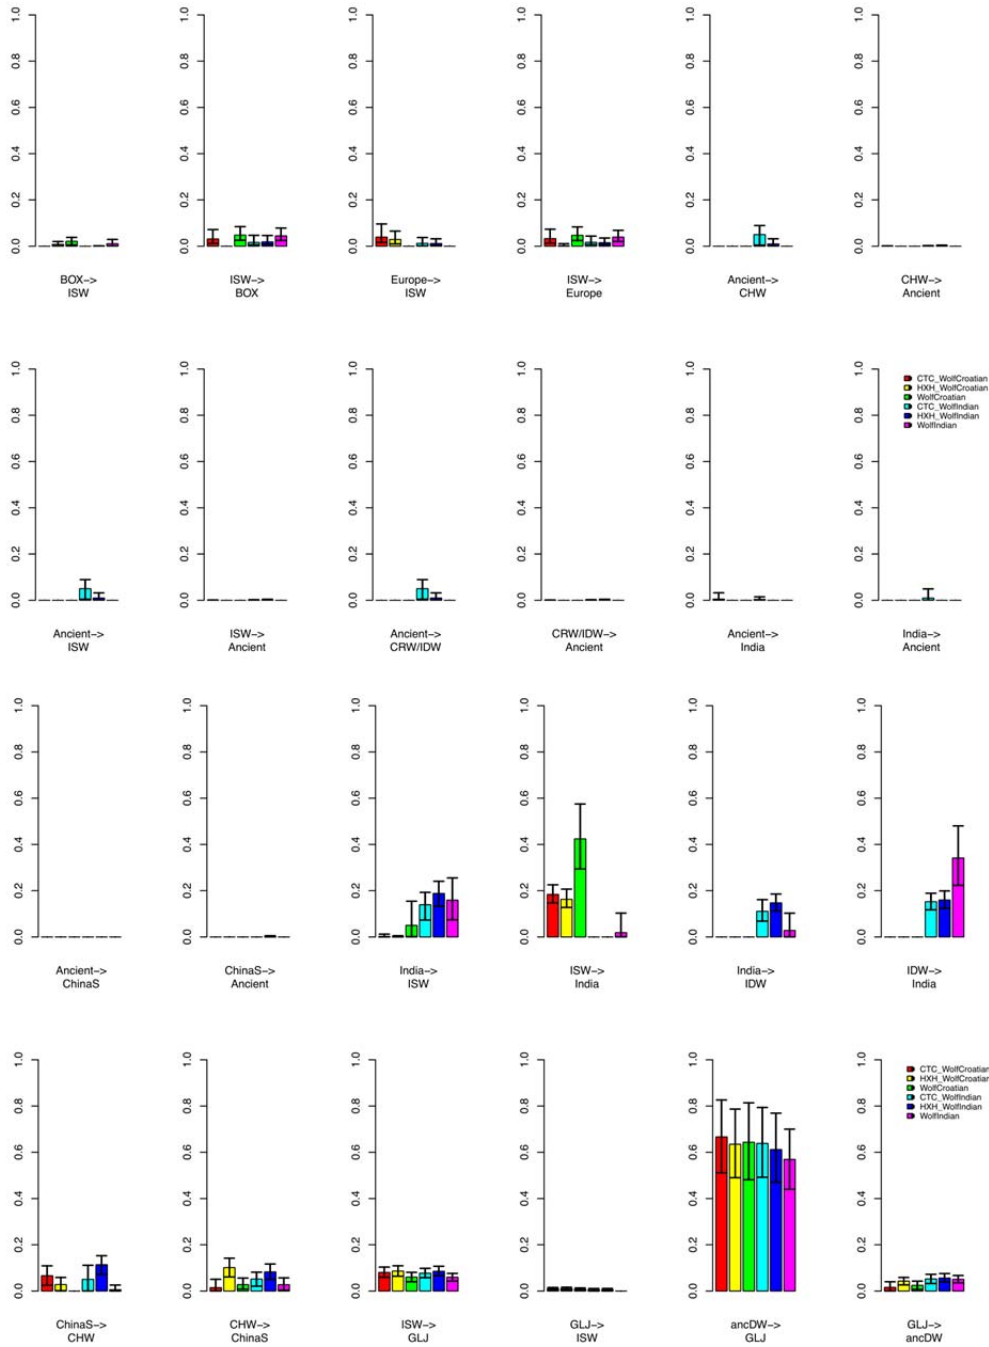

1002 **Supplementary Figure 53:** Total migration rate estimates in G-PhoCS analysis. We use the tree  
 1003 of the form (((((Boxer, Village\_Europe), Village\_India), Village\_ChinaS), ((wolfY, IsraeliWolf),  
 1004 ChineseWolf)), GoldenJackal), with or without one ancient sample sister to the ancestral of  
 1005 boxer and Village\_Europe: (1) wolfY as CroatianWolf, with CTC; (2) wolfY as CroatianWolf,  
 1006 with HXH; (3) wolfY as CroatianWolf, no ancient sample; (4) wolfY as IndianWolf, with CTC;  
 1007 with HXH; (5) wolfY as IndianWolf, with HXH; (6) wolfY as IndianWolf, no ancient sample. This analysis  
 1008 used 5,000 randomly selected loci.  
 1009  
 1010

1011 **Supplementary Figure 54**

1012

1013

1014

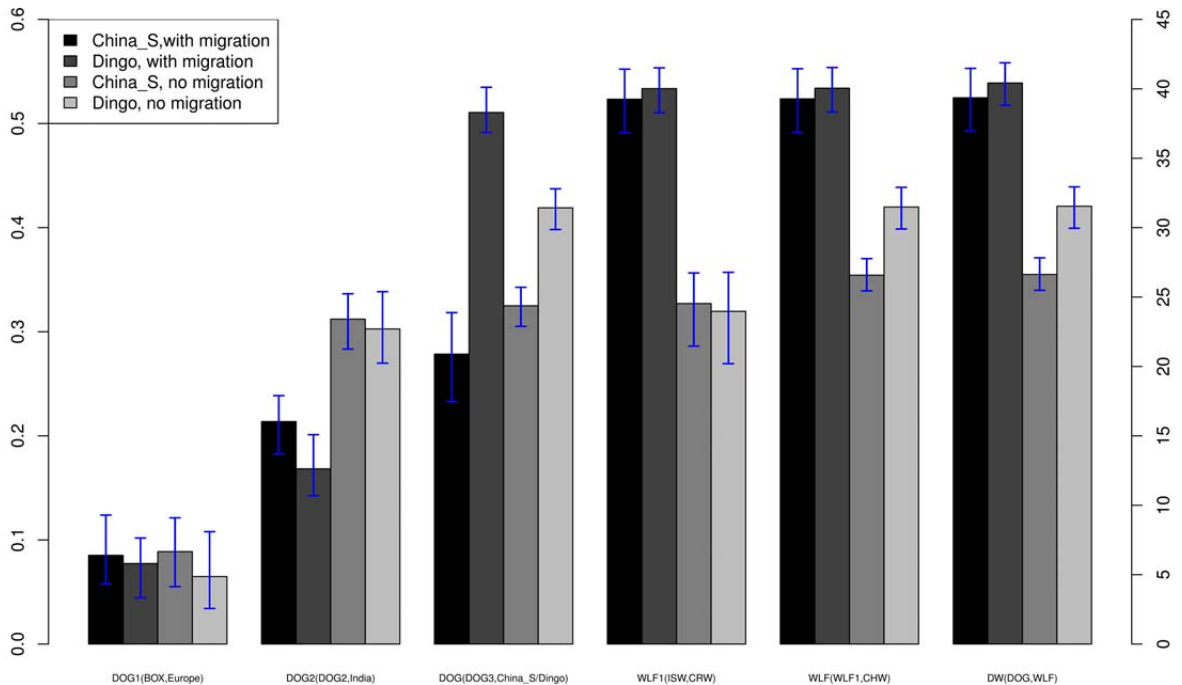

1015

1016 **Supplementary Figure 54:** Comparison of divergence time estimates with/without migration  
 1017 setting in G-PhoCS analysis. We use the tree in form (((((Boxer, Village\_Europe),  
 1018 Village\_India), Village\_ChinaS or dingo), ((CroatianWolf, IsraeliWolf), ChineseWolf)),  
 1019 GoldenJackal), with or without migration setting. Axis on the left are raw estimates, scaled up by  
 1020  $1e04$ . Axis on the right are recalibrated estimates in thousand years, assuming mutation rate  
 1021  $4 \times 10^{-9}$  per/generation, generation time 3 years. This analysis used 16,434 loci.

1022

1023

1024

1025

1026

1027

1028

1029

1030

1031

1032

1033

1034

1035

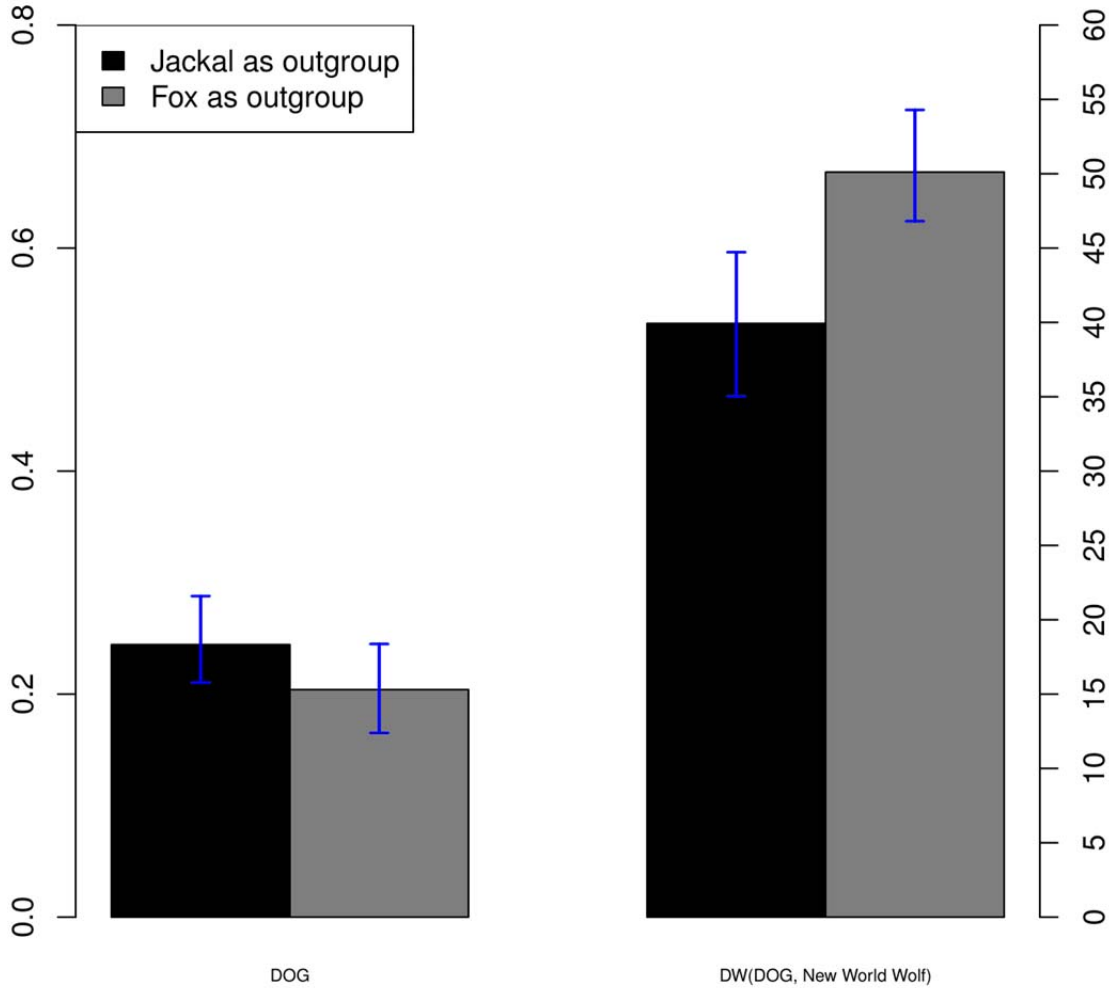

1037  
 1038 **Supplementary Figure 55:** Comparison of divergence time estimates using different outgroups.  
 1039 We use the tree of the form (((Village\_Europe1,Village\_Europe2), (Village\_ChinaS1,  
 1040 Village\_ChinaS2)), ( yellowstoneWolf1, yellowstoneWolf2)), outgroup), with outgroup being  
 1041 either golden jackal or Andean fox. Axis on the left are raw estimates, scaled up by  $1 \times 10^4$ . Axis  
 1042 on the right are recalibrated estimates in thousand years, assuming mutation rate  $4 \times 10^{-9}$   
 1043 per/generation, generation time 3 years. This analysis used 5,000 randomly selected loci.  
 1044  
 1045  
 1046  
 1047  
 1048





1077 **Supplementary Figure 57**

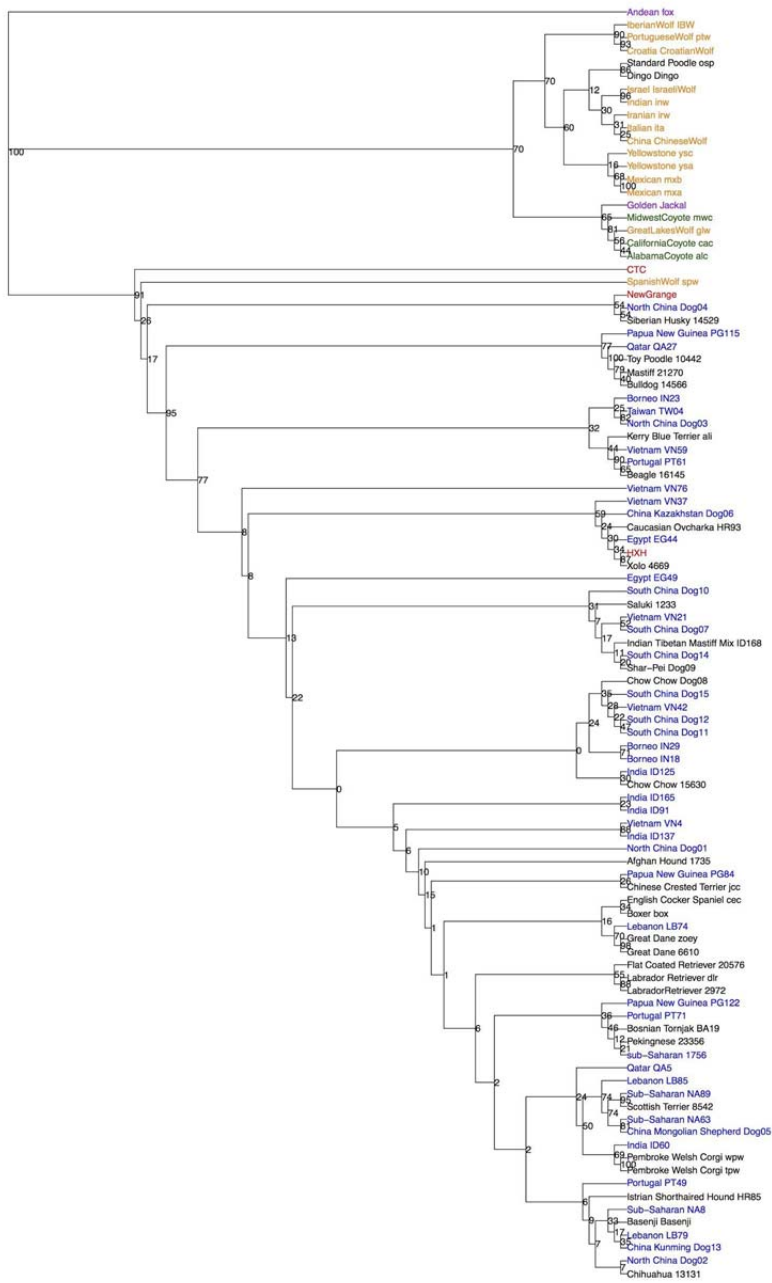

1078  
 1079 **Supplementary Figure 57:** NJ tree (100 bootstraps) for 1231 SNPs within the  $F_{ST}$  Window 12.  
 1080 Bootstrap values are indicated at each node. Sample types are distinguished by color: ancient  
 1081 dogs (red), breed dogs (black), village dogs (blue), wolves (yellow), coyote (green), and golden  
 1082 jackal (purple). Also indicated at each branch are the sample identifiers and geographic origin (if  
 1083 available). Branch lengths are proportional to ease viewing.

1084  
 1085  
 1086  
 1087  
 1088

1089 **Supplementary Figure 58**  
 1090

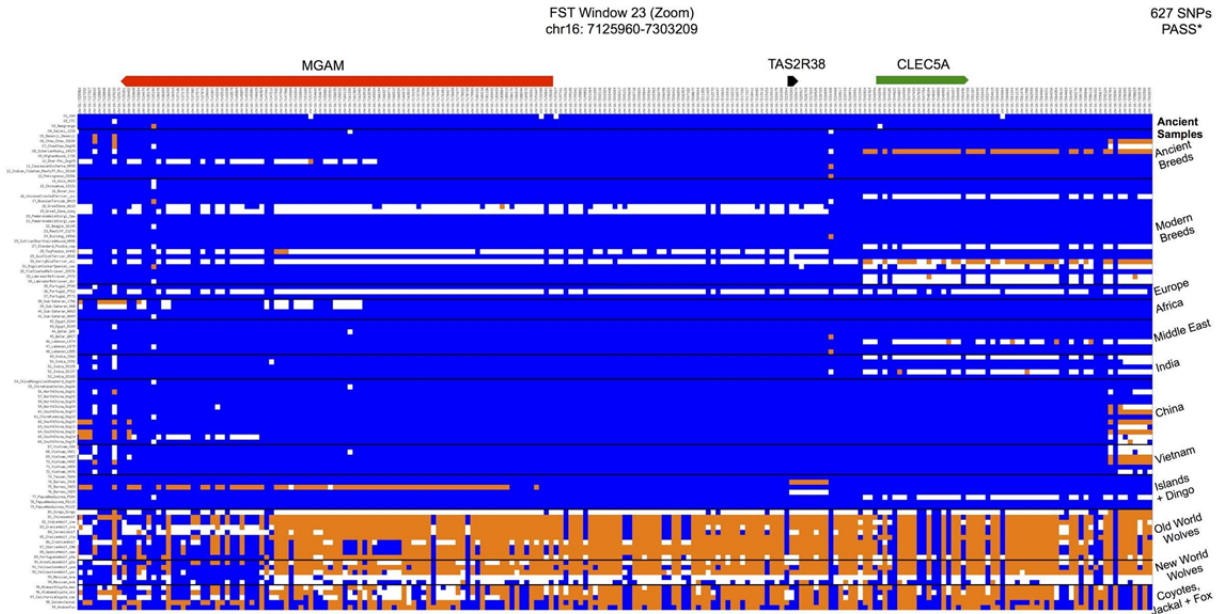

1091 **Supplementary Figure 58:** A zoomed-in view of the less-variable portion of Axelsson *et al.*  
 1092  $F_{ST}$ -derived domestication locus 23 (chr16: 7125960-7303209). The identifiers of each dog (left)  
 1093 and their broader classification or geographic origin (right) are provided. Genotypes for each  
 1094 SNP (along the top) are colored as sites homozygous for the reference allele (0/0) are blue,  
 1095 heterozygous sites (0/1) are white, and homozygous (1/1) for the alternate allele are orange.  
 1096 Gene models and orientation are above for *MGAM* (red), *TAS2R38* (black), and *CLEC5A*  
 1097 (green).  
 1098

1099  
 1100  
 1101  
 1102  
 1103  
 1104  
 1105  
 1106  
 1107  
 1108  
 1109  
 1110  
 1111  
 1112  
 1113  
 1114  
 1115  
 1116  
 1117  
 1118

1119 **Supplementary Figure 59**  
 1120  
 1121

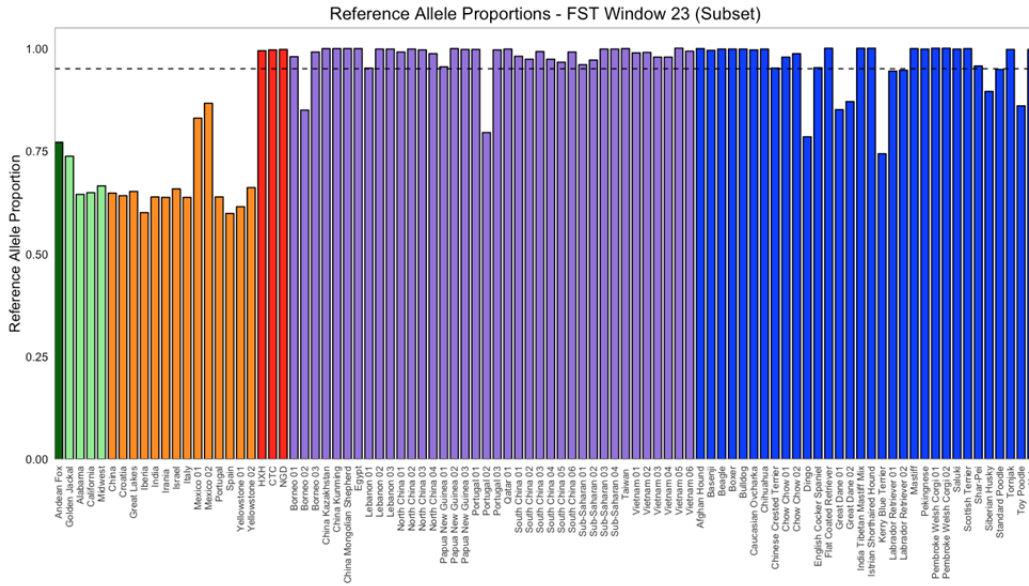

1122 **Supplementary Figure 59** - Average reference allele counts for SNP sites in the less variable  
 1123 subset of the *MGAM* locus ( $F_{ST}$  Window 23; chr16: 7125960-7303209). The colors are as  
 1124 follows: Andean fox (green), golden jackal and coyotes (light green), wolves (orange), ancient  
 1125 dogs (red), village dogs (purple), and breed dogs (blue). The dashed line indicates the 0.95  
 1126 reference allele proportion threshold used to determine whether a sample was dog-like or wild-  
 1127 like.  
 1128

1129  
 1130  
 1131  
 1132  
 1133  
 1134  
 1135  
 1136  
 1137  
 1138  
 1139  
 1140  
 1141  
 1142  
 1143  
 1144  
 1145  
 1146  
 1147  
 1148  
 1149

1150 **Supplementary Figure 60**  
 1151

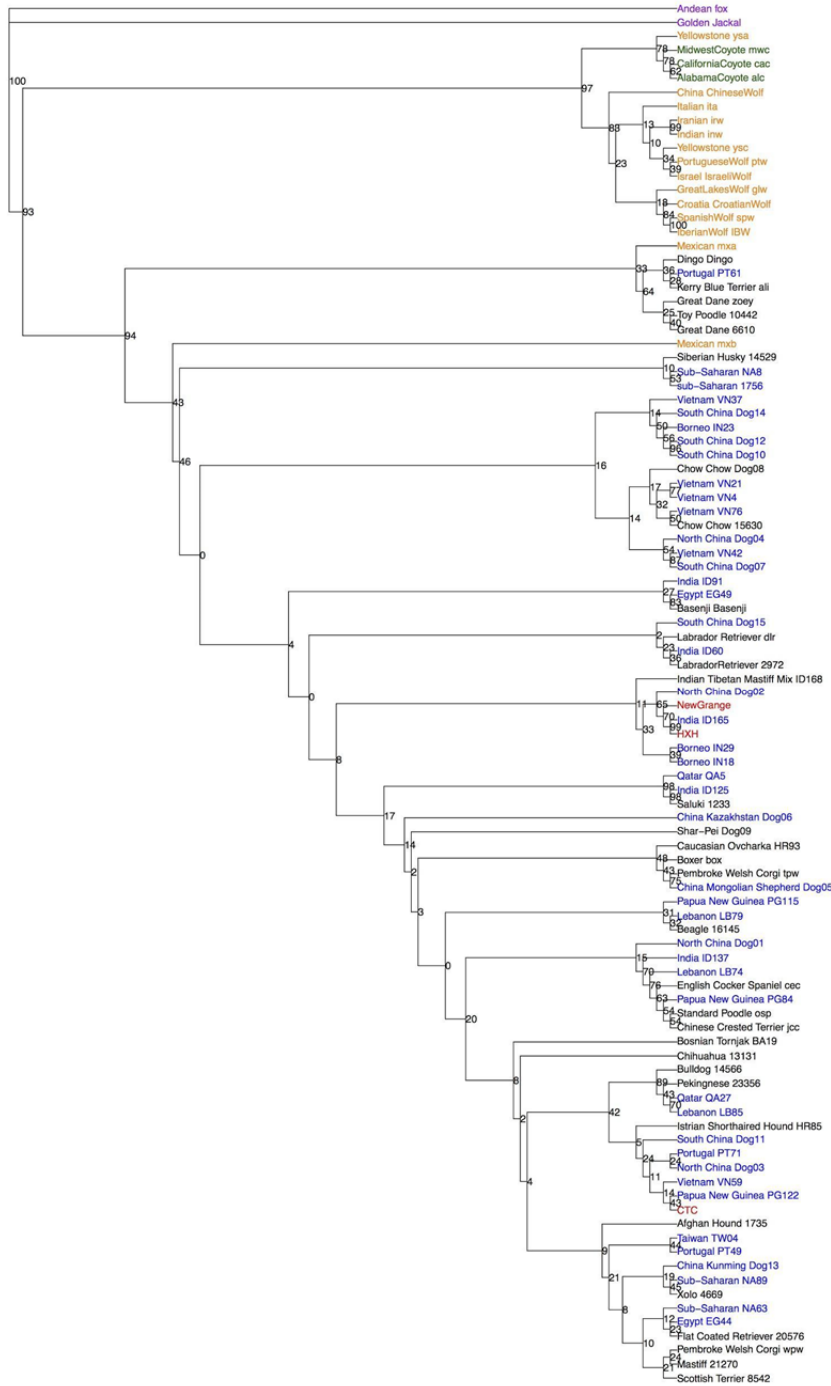

1152 **Supplementary Figure 59.** NJ tree (100 bootstraps) for 1,448 SNPs within the  $F_{ST}$  Window 23.  
 1153 Bootstrap values are indicated at each node. Sample types are distinguished by color: ancient  
 1154 dogs (red), breed dogs (black), village dogs (blue), wolves (yellow), coyote (green), and golden  
 1155 jackal (purple). Also indicated at each branch are the sample identifiers and geographic origin (if  
 1156 available). Branch lengths are proportional to ease viewing  
 1157  
 1158

1159 **Supplementary Table 1: Neolithic sub-divisions in Southern Germany.**

| <b>Sub-division</b> | <b>Culture</b>                                 | <b>Period</b>        |
|---------------------|------------------------------------------------|----------------------|
| Early Neolithic     | Linear Pottery Culture                         | 5,400-4,900 BCE cal. |
| Middle Neolithic    | Hinkelstein/Stroked Pottery/Großgartach/Rössen | 4,900-4,300 BCE cal. |
| Younger Neolithic   | Michelsberg Culture/Altheim                    | 5,300-3,500 BCE cal. |
| Late Neolithic      | Horgen/Goldberg III/Cham/Wartberg/Bernburg     | 3,500-2,600 BCE cal. |
| End Neolithic       | Corded Ware Culture/Bell Beaker Culture        | 2,800-2,000 BCE cal. |

- 1160
- 1161
- 1162
- 1163
- 1164
- 1165
- 1166
- 1167
- 1168
- 1169
- 1170
- 1171
- 1172
- 1173
- 1174
- 1175
- 1176
- 1177
- 1178
- 1179
- 1180
- 1181
- 1182
- 1183
- 1184
- 1185
- 1186
- 1187
- 1188
- 1189
- 1190
- 1191

1192 **Supplementary Table 2: HiSeq sequencing statistics for ancient samples.**

| Sample | Total Reads sequenced | Merged reads mapped after filtering | Duplicate Reads | % Endogenous DNA (flagstat) | Coverage | Mean fragment length | % 5' C>T | % 3' G>A |
|--------|-----------------------|-------------------------------------|-----------------|-----------------------------|----------|----------------------|----------|----------|
| HXH    | 693,443,481           | 433,815,523                         | 56,068,409      | 67.21%                      | 9x       | 60bp                 | 34.8     | 35.8     |
| CTC    | 563,180,319           | 414,120,523                         | 108,815,544     | 77.29%                      | 9x       | 70bp                 | 28.2     | 28.3     |
| NGD    | 1,310,607,189         | NA                                  | 198,486,473     | 99.64%                      | 25x      | 58bp                 | 26.3     | 25.6     |

Note, unlike during MiSeq screening, endogenous DNA here is estimated based on the proportion of reads submitted to BWA that mapped without any quality score filtering. Endogenous DNA content is almost 100% for NGD as we only obtained mapped reads.

1193  
 1194  
 1195  
 1196  
 1197  
 1198  
 1199  
 1200  
 1201  
 1202  
 1203  
 1204  
 1205  
 1206  
 1207  
 1208  
 1209  
 1210  
 1211  
 1212  
 1213  
 1214  
 1215  
 1216  
 1217  
 1218  
 1219  
 1220  
 1221  
 1222  
 1223  
 1224  
 1225  
 1226  
 1227  
 1228  
 1229  
 1230

1231 **Supplementary Table 3. Sample information for SNP array datasets.**

| Sample Description                      | Source     | Canine type | location     | short-code | # of individuals |
|-----------------------------------------|------------|-------------|--------------|------------|------------------|
| AncientDog                              | this study | AncientDog  | AncientDog   | CTC        | 1                |
| AncientDog                              | this study | AncientDog  | AncientDog   | HXH        | 1                |
| AncientDog                              | this study | AncientDog  | AncientDog   | NGD        | 1                |
| -                                       | Shannon    | Breed       | -            | br         | 4848             |
| Chinese Wolf                            | Freedman   | Wolf        | ChineseWolf  | WLC        | 1                |
| Croatian Wolf                           | Freedman   | Wolf        | CroatianWolf | WLE        | 1                |
| Golden Jackal                           | Freedman   | Jackal      | Jackal       | Jackal     | 1                |
| Israeli Wolf                            | Freedman   | Wolf        | IsraeliWolf  | WIS        | 1                |
| Village Dog Afghanistan                 | Shannon    | VillageDog  | Afghanistan  | Afg        | 13               |
| Village Dog Belize                      | Shannon    | VillageDog  | Americas     | Bel        | 4                |
| Village Dog Bosnia                      | Shannon    | VillageDog  | Europe       | Bos        | 3                |
| Village Dog Brazil                      | Shannon    | VillageDog  | Americas     | Bra        | 12               |
| Village Dog Brazil                      | Shannon    | VillageDog  | Europe       | Bra        | 1                |
| Village Dog Burkina Faso                | Shannon    | VillageDog  | Africa       | Bur        | 2                |
| Village Dog Colombia                    | Shannon    | VillageDog  | Americas     | Col        | 9                |
| Village Dog Costa Rica                  | Shannon    | VillageDog  | Americas     | Cos        | 8                |
| Village Dog Croatia                     | Shannon    | VillageDog  | Europe       | Cro        | 6                |
| Village Dog DRC-Boende                  | Shannon    | VillageDog  | Africa       | DRC        | 15               |
| Village Dog DRC-Katanga                 | Shannon    | VillageDog  | Africa       | DRC        | 12               |
| Village Dog DRC-Kinshasa                | Shannon    | VillageDog  | Africa       | DRC        | 6                |
| Village Dog Dominican Republic          | Shannon    | VillageDog  | Americas     | Dom        | 12               |
| Village Dog Egypt-Giza                  | Shannon    | VillageDog  | Egypt        | Egy        | 3                |
| Village Dog Egypt-Kharga                | Shannon    | VillageDog  | Egypt        | Egy        | 1                |
| Village Dog Egypt-Luxor                 | Shannon    | VillageDog  | Egypt        | Egy        | 12               |
| Village Dog Fiji-Kadavu                 | Shannon    | VillageDog  | Islands      | Fij        | 12               |
| Village Dog Fiji-Tavenui                | Shannon    | VillageDog  | Islands      | Fij        | 1                |
| Village Dog Fiji-Viti Levu              | Shannon    | VillageDog  | Islands      | Fij        | 16               |
| Village Dog French Polynesia-Marquesas- | Shannon    | VillageDog  | Islands      | Fre        | 12               |

|                                                        |         |            |             |     |    |
|--------------------------------------------------------|---------|------------|-------------|-----|----|
| Hiva Oa                                                |         |            |             |     |    |
| Village Dog French Polynesia-Society Islands-Bora Bora | Shannon | VillageDog | Islands     | Fre | 5  |
| Village Dog French Polynesia-Society Islands-Huahine   | Shannon | VillageDog | Islands     | Fre | 8  |
| Village Dog French Polynesia-Society Islands-Moorea    | Shannon | VillageDog | Islands     | Fre | 5  |
| Village Dog French Polynesia-Society Islands-Raiatea   | Shannon | VillageDog | Islands     | Fre | 6  |
| Village Dog Ghana                                      | Shannon | VillageDog | Africa      | Gha | 5  |
| Village Dog Guinea                                     | Shannon | VillageDog | Africa      | Gui | 1  |
| Village Dog Honduras                                   | Shannon | VillageDog | Americas    | Hon | 8  |
| Village Dog India-Chennai                              | Shannon | VillageDog | India       | I-C | 6  |
| Village Dog India-Dehli                                | Shannon | VillageDog | India       | I-D | 6  |
| Village Dog India-Hazaribagh                           | Shannon | VillageDog | India       | I-H | 2  |
| Village Dog India-Mumbai                               | Shannon | VillageDog | India       | I-M | 6  |
| Village Dog India-Orissa                               | Shannon | VillageDog | India       | I-O | 6  |
| Village Dog India-West Bengal                          | Shannon | VillageDog | India       | I-W | 6  |
| Village Dog Indonesia-Borneo                           | Shannon | VillageDog | Indonesia   | InB | 9  |
| Village Dog Indonesia-Jakarta                          | Shannon | VillageDog | Indonesia   | InJ | 2  |
| Village Dog Iraq                                       | Shannon | VillageDog | MiddleEast  | Ira | 1  |
| Village Dog Lebanon-Bekaa                              | Shannon | VillageDog | MiddleEast  | Leb | 7  |
| Village Dog Lebanon-Beruit                             | Shannon | VillageDog | Africa      | Leb | 1  |
| Village Dog Lebanon-Beruit                             | Shannon | VillageDog | MiddleEast  | Leb | 8  |
| Village Dog Liberia-Lofa                               | Shannon | VillageDog | Africa      | Lib | 18 |
| Village Dog Liberia-Monrovia                           | Shannon | VillageDog | Africa      | Lib | 4  |
| Village Dog Mexico-Mexico City                         | Shannon | VillageDog | Americas    | Mex | 6  |
| Village Dog Mexico-Morelia                             | Shannon | VillageDog | Americas    | Mex | 9  |
| Village Dog Mongolia                                   | Shannon | VillageDog | CentralAsia | Mon | 13 |
| Village Dog Namibia-Central                            | Shannon | VillageDog | Americas    | Nam | 1  |
| Village Dog Namibia-Northern                           | Shannon | VillageDog | Africa      | Nam | 14 |
| Village Dog Nepal                                      | Shannon | VillageDog | CentralAsia | Nep | 12 |



|                                             |         |            |            |     |    |
|---------------------------------------------|---------|------------|------------|-----|----|
| Village Dog Nigeria                         | Shannon | VillageDog | Africa     | Nig | 1  |
| Village Dog Palau                           | Shannon | VillageDog | Americas   | Pal | 1  |
| Village Dog Panama                          | Shannon | VillageDog | Americas   | Pan | 2  |
| Village Dog Papua New Guinea-East Highlands | Shannon | VillageDog | PNG        | Pap | 11 |
| Village Dog Papua New Guinea-Port Moresby   | Shannon | VillageDog | PNG        | Pap | 9  |
| Village Dog Peru-Arequipa                   | Shannon | VillageDog | Americas   | Per | 16 |
| Village Dog Peru-Cusco                      | Shannon | VillageDog | Americas   | Per | 25 |
| Village Dog Peru-Ica                        | Shannon | VillageDog | Americas   | Per | 8  |
| Village Dog Peru-Loreto                     | Shannon | VillageDog | Americas   | Per | 25 |
| Village Dog Peru-Puno                       | Shannon | VillageDog | Americas   | Per | 17 |
| Village Dog Portugal                        | Shannon | VillageDog | Europe     | Por | 9  |
| Village Dog Puerto Rico                     | Shannon | VillageDog | Americas   | Pue | 9  |
| Village Dog Qatar                           | Shannon | VillageDog | MiddleEast | Qat | 9  |
| Village Dog Solomon Islands-Central         | Shannon | VillageDog | Islands    | Sol | 4  |
| Village Dog Solomon Islands-Guadalcanal     | Shannon | VillageDog | Islands    | Sol | 3  |
| Village Dog Solomon Islands-Makira          | Shannon | VillageDog | Islands    | Sol | 4  |
| Village Dog Solomon Islands-Western         | Shannon | VillageDog | Islands    | Sol | 4  |
| Village Dog Sudan                           | Shannon | VillageDog | Africa     | Sud | 1  |
| Village Dog Turkey-Giresun                  | Shannon | VillageDog | MiddleEast | Tur | 3  |
| Village Dog Turkey-Istanbul                 | Shannon | VillageDog | MiddleEast | Tur | 10 |
| Village Dog US-Alaska                       | Shannon | VillageDog | Arctic     | US  | 11 |
| Village Dog Uganda                          | Shannon | VillageDog | Africa     | Uga | 12 |
| Village Dog Vietnam-Cao Bang                | Shannon | VillageDog | Vietnam    | Vie | 6  |
| Village Dog Vietnam-Ha Giang                | Shannon | VillageDog | Vietnam    | Vie | 5  |
| Village Dog Vietnam-Lang Son                | Shannon | VillageDog | Vietnam    | Vie | 5  |
| Village Dog Vietnam-Lao Cai                 | Shannon | VillageDog | Vietnam    | Vie | 4  |
| free-breeding dog                           | Pilot   | VillageDog | Armenia    | pAR | 25 |
| free-breeding dog                           | Pilot   | VillageDog | Bulgaria   | pBU | 9  |
| free-breeding dog                           | Pilot   | VillageDog | Central    | pCR | 16 |

|                   |                        |            |                   |     |    |
|-------------------|------------------------|------------|-------------------|-----|----|
|                   |                        |            | Russia            |     |    |
| free-breeding dog | Pilot                  | VillageDog | China             | pCH | 9  |
| free-breeding dog | Pilot                  | VillageDog | East Russia       | pER | 19 |
| free-breeding dog | Pilot                  | VillageDog | Iraq              | pIR | 8  |
| free-breeding dog | Pilot                  | VillageDog | Kazakhstan        | pKA | 20 |
| free-breeding dog | Pilot                  | VillageDog | Mongolia          | pMO | 27 |
| free-breeding dog | Pilot                  | VillageDog | Poland            | pPO | 21 |
| free-breeding dog | Pilot                  | VillageDog | Saudi Arabia<br>1 | pSA | 22 |
| free-breeding dog | Pilot                  | VillageDog | Saudi Arabia<br>2 | pSA | 5  |
| free-breeding dog | Pilot                  | VillageDog | Slovenia          | pSL | 13 |
| free-breeding dog | Pilot                  | VillageDog | Tajikistan        | pTA | 19 |
| free-breeding dog | Pilot                  | VillageDog | Thailand          | pTH | 21 |
| wolfIberian       | from genome<br>dataset | Wolf       | wolfIberian       | WLE | 1  |
| wolfIndia         | from genome<br>dataset | Wolf       | wolfIndia         | WIN | 1  |
| wolfIran          | from genome<br>dataset | Wolf       | wolfIran          | WIR | 1  |
| wolfItaly         | from genome<br>dataset | Wolf       | wolfItaly         | WLE | 1  |
| wolfMexico        | from genome<br>dataset | Wolf       | wolfMexico        | WLA | 2  |
| wolfPortugal      | from genome<br>dataset | Wolf       | wolfPortugal      | WLE | 1  |
| wolfSpain         | from genome<br>dataset | Wolf       | wolfSpain         | WLE | 1  |
| wolfYellowstone   | from genome<br>dataset | Wolf       | wolfYellowstone   | WLA | 3  |
| wolfgreatLakes    | from genome<br>dataset | Wolf       | wolfgreatLakes    | WLA | 1  |

1232  
1233  
1234  
1235  
1236  
1237

1238 **Supplementary Table 4: Sample descriptions for whole-genome sequenced canines used for**  
1239 **variant calling.** Our unique sample identifier, sex, canine description, origin of sample (if  
1240 available), SRA project (if available) and sample identifiers, and published study are provided  
1241 for each sample used in our whole-genome analysis. Asterisks (\*) indicated subset of read data  
1242 from samples were described in Decker *et al.*. Raw sequencing files were obtained for all other  
1243 samples from which variants were called.

| Sample ID | Sex | Auto Coverage | Canine Type | Sample Description        | Geographic Origin  | SRA Project ID | SRA Sample ID | Publication                                         |
|-----------|-----|---------------|-------------|---------------------------|--------------------|----------------|---------------|-----------------------------------------------------|
| CTC       | M   | 9             | Ancient     | CTC                       | Germany            | PRJNA319283    | SRS14077451   | This study                                          |
| HXH       | M   | 9             | Ancient     | HXH                       | Germany            | PRJNA319283    | SRS1407453    | This study                                          |
| NGD       | M   | 28            | Ancient     | Newgrange                 | Ireland            | PRJEB13070     | -             | Frantz <i>et al.</i>                                |
| 1735      | F   | 8             | Breed       | Afghan Hound              | n/a                | PRJNA232497    | SRS520039     | Auton <i>et al.</i>                                 |
| Basenji   | M   | 19            | Breed       | Basenji                   | U.S.               | PRJNA274504    | SRS1025426    | Freedman <i>et al.</i>                              |
| 16145     | M   | 7             | Breed       | Beagle                    | n/a                | SRP073312      | SRS1397614    | Freedman <i>et al.</i><br>Schoenebeck <i>et al.</i> |
| box       | F   | 23            | Breed       | Boxer                     | n/a                | PRJNA255370    | SRS661481     | Fan <i>et al.</i>                                   |
| 14566     | F   | 14            | Breed       | Bulldog                   | n/a                | PRJNA288568    | SRS984782     | Freedman <i>et al.</i><br>Schoenebeck <i>et al.</i> |
| HR93      | F   | 11            | Breed       | Caucasian Ovcharka        | Bosnia             | PRJNA232497    | SRS520060     | Auton <i>et al.</i>                                 |
| 13131     | F   | 6             | Breed       | Chihuahua                 | n/a                | PRJNA288568    | SRS984783     | Freedman <i>et al.</i><br>Schoenebeck <i>et al.</i> |
| jcc       | M   | 22            | Breed       | Chinese Crested Terrier   | U.K.<br>(England)  | PRJNA255370    | SRS661484     | Fan <i>et al.</i>                                   |
| 15630     | F   | 13            | Breed       | Chow Chow                 | n/a                | SRP073312      | SRS1397613    | Freedman <i>et al.</i><br>Schoenebeck <i>et al.</i> |
| cec       | M   | 10            | Breed       | English Cocker Spaniel    | n/a                | PRJNA255370    | SRS661482     | Fan <i>et al.</i>                                   |
| 20576     | F   | 8             | Breed       | Flat Coated Retriever     | n/a                | SRP073312      | SRS1397625    | Freedman <i>et al.</i><br>Schoenebeck <i>et al.</i> |
| 6610      | F   | 7             | Breed       | Great Dane                | n/a                | PRJNA288568    | SRS984791     | Freedman <i>et al.</i><br>Schoenebeck <i>et al.</i> |
| zoe       | F   | 19            | Breed       | Great Dane                | U.S.<br>(Michigan) | SRP073312      | SRS1397510    | This study                                          |
| HR85      | F   | 7             | Breed       | Istrian Shorthaired Hound | Bosnia             | PRJNA232497    | SRS520059     | Auton <i>et al.</i>                                 |
| ali       | M   | 18            | Breed       | Kerry Blue Terrier        | n/a                | PRJNA255370    | SRS661480     | Fan <i>et al.</i>                                   |
| dlr       | M   | 12            | Breed       | Labrador Retriever        | n/a                | PRJNA255370    | SRS661483     | Fan <i>et al.</i>                                   |
| 2972      | M   | 10            | Breed       | Labrador Retriever        | n/a                | PRJNA232497    | SRS520040     | Auton <i>et al.</i>                                 |
| 21270     | F   | 13            | Breed       | Mastiff                   | n/a                | PRJNA288568    | SRS984789     | Freedman <i>et al.</i><br>Schoenebeck <i>et al.</i> |
| 23356     | F   | 9             | Breed       | Pekingese                 | n/a                | PRJNA288568    | SRS984793     | Freedman <i>et al.</i><br>Schoenebeck <i>et al.</i> |
| tpw       | F   | 9             | Breed       | Pembroke Welsh Corgi      | n/a                | PRJNA263947    | SRS732550     |                                                     |
| wpw       | M   | 7             | Breed       | Pembroke Welsh Corgi      | n/a                | PRJNA263947    | SRS732549     |                                                     |

|               |   |    |             |                           |                   |             |            |                                                     |
|---------------|---|----|-------------|---------------------------|-------------------|-------------|------------|-----------------------------------------------------|
| 1233          | F | 9  | Breed       | Saluki                    | n/a               | PRJNA288568 | SRS984796  | Freedman <i>et al.</i><br>Schoenebeck <i>et al.</i> |
| 8542          | F | 8  | Breed       | Scottish Terrier          | n/a               | PRJNA288568 | SRS984798  | Freedman <i>et al.</i><br>Schoenebeck <i>et al.</i> |
| 14529         | F | 8  | Breed       | Siberian Husky            | n/a               | PRJNA288568 | SRS984799  | Freedman <i>et al.</i><br>Schoenebeck <i>et al.</i> |
| osp           | M | 14 | Breed       | Standard Poodle           | U.K. (England)    | PRJNA255370 | SRS661485  | Fan <i>et al.</i>                                   |
| BA19          | M | 6  | Breed       | Tornjak                   | Bosnia            | PRJNA232497 | SRS520042  | Auton <i>et al.</i>                                 |
| 10442         | F | 8  | Breed       | Toy Poodle                | n/a               | PRJNA288568 | SRS984800  | Freedman <i>et al.</i><br>Schoenebeck <i>et al.</i> |
| 4669          | M | 17 | Breed       | Xoloitzcuintli            | n/a               | PRJNA232497 | SRS520041  | Auton <i>et al.</i>                                 |
| ID168         | M | 10 | Breed       | India Tibetan Mastiff Mix | India             | PRJNA232497 | SRS520064  | Auton <i>et al.</i>                                 |
| alc           | M | 6  | Coyote      | Coyote_Alabama            | U.S. (Alabama)    | PRJNA255370 | SRS661478  | Fan <i>et al.</i>                                   |
| mwc           | M | 8  | Coyote      | Coyote_Midwest            | U.S. (Midwest)    | PRJNA255370 | SRS661479  | Fan <i>et al.</i>                                   |
| cac           | M | 33 | Coyote      | Coyote_California         | U.S. (California) | PRJNA255370 | SRS661477  | Fan <i>et al.</i>                                   |
| Dingo         | M | 19 | Breed       | Dingo                     | Australia         | PRJNA274504 | SRS1025425 | Freedman <i>et al.</i>                              |
| Golden Jackal | F | 24 | Jackal      | Golden Jackal             | Israel            | PRJNA274504 | SRS1025419 | Freedman <i>et al.</i>                              |
| PT49          | M | 16 | Village Dog | Portugal                  | Portugal          | SRP034749   | SRS1397563 | This study                                          |
| PT61          | F | 18 | Village Dog | Portugal                  | Portugal          | PRJNA232497 | SRS520079  | Auton <i>et al.</i>                                 |
| PT71          | M | 16 | Village Dog | Portugal                  | Portugal          | PRJNA232497 | SRS520080  | Auton <i>et al.</i>                                 |
| ID125         | M | 15 | Village Dog | India                     | India             | PRJNA232497 | SRS520061  | Auton <i>et al.</i>                                 |
| ID137         | M | 8  | Village Dog | India                     | India             | PRJNA232497 | SRS520062  | Auton <i>et al.</i>                                 |
| ID165         | M | 10 | Village Dog | India                     | India             | PRJNA232497 | SRS520063  | Auton <i>et al.</i>                                 |
| ID60          | M | 15 | Village Dog | India                     | India             | PRJNA232497 | SRS520065  | Auton <i>et al.</i>                                 |
| ID91          | F | 8  | Village Dog | India                     | India             | PRJNA232497 | SRS520066  | Auton <i>et al.</i>                                 |
| EG44          | M | 9  | Village Dog | Egypt                     | Egypt             | PRJNA232497 | SRS520057  | Auton <i>et al.</i>                                 |
| EG49          | M | 8  | Village Dog | Egypt                     | Egypt             | PRJNA232497 | SRS520058  | Auton <i>et al.</i>                                 |
| LB74          | M | 7  | Village Dog | Lebanon                   | Lebanon           | PRJNA232497 | SRS520070  | Auton <i>et al.</i>                                 |
| LB79          | M | 9  | Village Dog | Lebanon                   | Lebanon           | PRJNA232497 | SRS520071  | Auton <i>et al.</i>                                 |
| LB85          | F | 10 | Village Dog | Lebanon                   | Lebanon           | PRJNA232497 | SRS520072  | Auton <i>et al.</i>                                 |
| QA27          | F | 12 | Village Dog | Qatar                     | Qatar             | PRJNA232497 | SRS520081  | Auton <i>et al.</i>                                 |
| QA5           | M | 7  | Village Dog | Qatar                     | Qatar             | PRJNA232497 | SRS520082  | Auton <i>et al.</i>                                 |

|       |   |    |             |                          |                                |             |            |                     |
|-------|---|----|-------------|--------------------------|--------------------------------|-------------|------------|---------------------|
| Dog07 | F | 7  | Village Dog | South China              | South China, Xilin             | PRJNA232497 | SRS520048  | Auton <i>et al.</i> |
| Dog08 | M | 7  | Breed       | Chow Chow                | South China                    | PRJNA232497 | SRS520049  | Auton <i>et al.</i> |
| Dog09 | M | 7  | Breed       | Shar-Pei                 | South China                    | PRJNA232497 | SRS520050  | Auton <i>et al.</i> |
| Dog10 | F | 8  | Village Dog | South China              | South China, Sichuan Liangshan | PRJNA232497 | SRS520051  | Auton <i>et al.</i> |
| Dog11 | M | 7  | Village Dog | South China              | South China, Sichuan Qinchuan  | PRJNA232497 | SRS520052  | Auton <i>et al.</i> |
| Dog12 | M | 7  | Village Dog | South China              | South China, Chongqing         | PRJNA232497 | SRS520053  | Auton <i>et al.</i> |
| Dog14 | M | 8  | Village Dog | South China              | South China, Guizhou Xiasi     | PRJNA232497 | SRS520055  | Auton <i>et al.</i> |
| Dog15 | F | 7  | Village Dog | South China              | South China                    | PRJNA232497 | SRS520056  | Auton <i>et al.</i> |
| IN18  | M | 6  | Village Dog | Borneo                   | Borneo                         | PRJNA232497 | SRS520067  | Auton <i>et al.</i> |
| IN23  | F | 6  | Village Dog | Borneo                   | Borneo                         | PRJNA232497 | SRS520068  | Auton <i>et al.</i> |
| IN29  | M | 6  | Village Dog | Borneo                   | Borneo                         | PRJNA232497 | SRS520069  | Auton <i>et al.</i> |
| PG115 | F | 6  | Village Dog | Papua New Guinea         | Papua New Guinea               | PRJNA232497 | SRS520076  | Auton <i>et al.</i> |
| PG122 | F | 7  | Village Dog | Papua New Guinea         | Papua New Guinea               | PRJNA232497 | SRS520077  | Auton <i>et al.</i> |
| PG84  | M | 13 | Village Dog | Papua New Guinea         | Papua New Guinea               | PRJNA232497 | SRS520078  | Auton <i>et al.</i> |
| TW04  | F | 17 | Village Dog | Taiwan                   | Taiwan                         | PRJNA232497 | SRS520083  | Auton <i>et al.</i> |
| Dog01 | F | 7  | Village Dog | North China              | North China, Shandong          | PRJNA232497 | SRS520043  | Auton <i>et al.</i> |
| Dog02 | M | 8  | Village Dog | North China              | North China, Shaanxi           | PRJNA232497 | SRS520044  | Auton <i>et al.</i> |
| Dog03 | M | 8  | Village Dog | North China              | North China, Hebei             | PRJNA232497 | SRS520045  | Auton <i>et al.</i> |
| Dog04 | F | 7  | Village Dog | North China              | North China, Mongolia          | PRJNA232497 | SRS520046  | Auton <i>et al.</i> |
| Dog05 | M | 7  | Village Dog | China Mongolian Shepherd | North China, Mongolia          | SRP034749   | SRS1397564 | This study          |
| Dog06 | F | 7  | Village Dog | China Kazakhstan         | North China, Kazakhstan        | PRJNA232497 | SRS520047  | Auton <i>et al.</i> |
| Dog13 | M | 8  | Village Dog | South China              | South China, Kunming           | PRJNA232497 | SRS520054  | Auton <i>et al.</i> |
| NA63  | M | 9  | Village Dog | Sub-Saharan              | Namibia                        | PRJNA232497 | SRS520073  | Auton <i>et al.</i> |
| NA8   | F | 15 | Village Dog | Sub-Saharan              | Namibia                        | PRJNA232497 | SRS520074  | Auton <i>et al.</i> |
| NA89  | M | 7  | Village Dog | Sub-Saharan              | Namibia                        | PRJNA232497 | SRS520075  | Auton <i>et al.</i> |
| 1756  | F | 9  | Village Dog | Sub-Saharan              | Sub-Saharan Africa             | SRP034749   | SRS1397565 | This study          |

|               |   |    |             |                  |                    |             |            |                        |
|---------------|---|----|-------------|------------------|--------------------|-------------|------------|------------------------|
| VN21          | F | 10 | Village Dog | Vietnam          | Vietnam            | PRJNA232497 | SRS520084  | Auton <i>et al.</i>    |
| VN37          | F | 8  | Village Dog | Vietnam          | Vietnam            | PRJNA232497 | SRS520085  | Auton <i>et al.</i>    |
| VN4           | M | 9  | Village Dog | Vietnam          | Vietnam            | PRJNA232497 | SRS520086  | Auton <i>et al.</i>    |
| VN42          | F | 8  | Village Dog | Vietnam          | Vietnam            | PRJNA232497 | SRS520087  | Auton <i>et al.</i>    |
| VN59          | M | 10 | Village Dog | Vietnam          | Vietnam            | PRJNA232497 | SRS520088  | Auton <i>et al.</i>    |
| VN76          | M | 7  | Village Dog | Vietnam          | Vietnam            | PRJNA232497 | SRS520089  | Auton <i>et al.</i>    |
| Croatian Wolf | F | 24 | Wolf        | wolf_Croatia     | Croatia            | PRJNA274504 | SRS1025420 | Freedman <i>et al.</i> |
| Israeli Wolf  | F | 24 | Wolf        | wolf_Israeli     | Israel             | PRJNA274504 | SRS1025423 | Freedman <i>et al.</i> |
| Chinese Wolf  | F | 24 | Wolf        | wolf_China       | China              | PRJNA274504 | SRS1025418 | Freedman <i>et al.</i> |
| inw           | M | 45 | Wolf        | wolf_India       | India              | PRJNA255370 | SRS661487  | Fan <i>et al.</i>      |
| irw           | F | 28 | Wolf        | wolf_Iran        | Iran               | PRJNA255370 | SRS661488  | Fan <i>et al.</i>      |
| ita           | M | 7  | Wolf        | wolf_Italy       | Italy              | PRJNA255370 | SRS661489  | Fan <i>et al.</i>      |
| mxa           | F | 25 | Wolf        | wolf_Mexico      | Mexico             | PRJNA255370 | SRS661490  | Fan <i>et al.</i>      |
| mxb           | F | 6  | Wolf        | wolf_Mexico      | Mexico             | PRJNA255370 | SRS661491  | Fan <i>et al.</i>      |
| ptw           | F | 31 | Wolf        | wolf_Portugal    | Portugal           | PRJNA255370 | SRS661492  | Fan <i>et al.</i>      |
| spw           | F | 23 | Wolf        | wolf_Spain       | Spain              | PRJNA255370 | SRS661495  | Fan <i>et al.</i>      |
| pen           | F | 35 | Wolf        | wolf_Iberia      | Spain              | SRP073312   | SRS1397562 | This study             |
| glw           | M | 34 | Wolf        | wolf_greatlake   | U.S. (Great Lakes) | PRJNA255370 | SRS661486  | Fan <i>et al.</i>      |
| ysa           | F | 28 | Wolf        | wolf_yellowstone | U.S. (Yellowstone) | PRJNA255370 | SRS661496  | Fan <i>et al.</i>      |
| ysc           | M | 6  | Wolf        | wolf_yellowstone | U.S. (Yellowstone) | PRJNA255370 | SRS661498  | Fan <i>et al.</i>      |
| Lcu2          | F | 9  | Andean Fox  | Andean Fox       | Andean Fox         | PRJNA232497 | SRS523207  | Auton <i>et al.</i>    |

1244  
1245  
1246  
1247  
1248  
1249  
1250  
1251  
1252  
1253

1254  
1255

**Supplementary Table 5: Most significant  $f_3$  test for populations with significantly negative statistics for SNP array data.** Short-codes are indicated in Supplementary Table 3.

| C   | A   | B   | F3       | Z score |
|-----|-----|-----|----------|---------|
| pCH | pPO | Vie | -0.01085 | -44.58  |
| pTH | pSL | Vie | -0.00957 | -43.83  |
| I-D | pER | I-O | -0.00874 | -33.63  |
| Leb | pPO | I-O | -0.0058  | -31.61  |
| Afg | pPO | I-W | -0.00581 | -28.21  |
| I-M | I-O | Fre | -0.0088  | -27.62  |
| pMO | pPO | Vie | -0.00679 | -26.91  |
| Pap | pSL | Vie | -0.00679 | -24.89  |
| pAR | pPO | I-O | -0.0038  | -24.23  |
| Tur | pPO | I-W | -0.00454 | -23.11  |
| Mon | pAR | Vie | -0.00528 | -21.92  |
| Nep | I-W | Pap | -0.00436 | -21.63  |
| pKA | pPO | I-O | -0.00356 | -21.49  |
| pTA | pPO | I-W | -0.00427 | -19.32  |
| I-C | I-O | Hon | -0.00592 | -18.7   |
| WIN | InJ | WIR | -0.02242 | -17.52  |
| Qat | pPO | I-O | -0.00349 | -10.9   |
| WIR | WLE | WIN | -0.01895 | -10.39  |
| DRC | Hon | Nig | -0.00437 | -7.25   |
| Sol | pSL | InB | -0.00234 | -7.01   |
| I-H | I-O | InB | -0.00271 | -5.49   |
| Uga | pER | Nig | -0.00312 | -5.21   |
| I-W | I-O | InB | -0.00152 | -4.91   |
| pBU | pPO | I-O | -0.0015  | -4.72   |
| Lib | Hon | Nig | -0.00373 | -4.66   |
| pCR | pPO | Vie | -0.00099 | -4.46   |
| Bur | Lib | Nig | -0.00244 | -4.17   |
| pER | pPO | Vie | -0.00102 | -3.67   |
| Cro | pPO | I-W | -0.00101 | -3.35   |
| WIS | HXH | WIR | -0.00537 | -2.26   |

1256  
1257

1258 **Supplementary Table 6: Most significant  $f_3$  test for populations with significantly negative**  
 1259 **statistics for whole genome SNP data.**

| C                  | A                        | B           | F3       | Z score |
|--------------------|--------------------------|-------------|----------|---------|
| Taiwan             | Qatar                    | Dingo       | -0.01178 | -24.12  |
| sub-Saharan Africa | Europe                   | Basenji     | -0.01136 | -20.5   |
| PNG                | Lebanon                  | Dingo       | -0.00955 | -16.65  |
| wolf_India         | wolf_Israel              | Jackal      | -0.02024 | -15.9   |
| wolf_Iran          | wolf_India               | wolf_Israel | -0.01748 | -11.83  |
| Lebanon            | China_MS                 | Basenji     | -0.00585 | -10.75  |
| China South        | Egypt                    | Dingo       | -0.00383 | -8.54   |
| Vietnam            | India                    | Dingo       | -0.00325 | -8.15   |
| China North        | Qatar                    | Dingo       | -0.00296 | -7.27   |
| China Kuming       | China Mongolian Shepherd | Dingo       | -0.00777 | -5.43   |
| Egypt              | Basenji                  | HXH         | -0.00139 | -2.62   |
| Qatar              | China Mongolian Shepherd | Basenji     | -0.00189 | -2.52   |

1260  
 1261  
 1262  
 1263  
 1264  
 1265  
 1266  
 1267  
 1268  
 1269  
 1270  
 1271  
 1272  
 1273  
 1274  
 1275  
 1276  
 1277  
 1278  
 1279  
 1280  
 1281  
 1282  
 1283



1284 **Supplementary Table 7: Two-way admixture events identified by MixMapper for HXH for**  
 1285 **both SNP array and genome data.**

| Data Set  | Admixed Pop. | Branch1 (Br1) | Branch2 | Residual norm | Br1 admixture % |
|-----------|--------------|---------------|---------|---------------|-----------------|
| Genome    | HXH          | Europe        | Borneo  | 1.1E-05       | 0.721-0.791     |
| SNP array | HXH          | Por*          | Vie     | 2.3E-04       | 0.866-1.000     |
| SNP array | HXH          | Fij*          | Vie     | 2.3E-04       | 0.838-0.894     |
| SNP array | HXH          | pSL*          | Vie     | 2.3E-04       | 0.865-0.873     |
| SNP array | HXH          | Bos*          | InB     | 2.3E-04       | 0.836-0.906     |
| SNP array | HXH          | pPO*          | InB     | 2.4E-04       | 0.845-1.000     |
| SNP array | HXH          | Por           | InB*    | 2.4E-04       | 0.815-0.862     |
| SNP array | HXH          | Por           | US      | 2.7E-04       | 0.688-0.716     |
| SNP array | HXH          | Por           | WLE*    | 2.7E-04       | 0.827-1.000     |
| SNP array | HXH          | Bos           | Vie     | 2.7E-04       | 0.836-0.876     |
| SNP array | HXH          | pSL*          | InB     | 2.8E-04       | 0.858-0.873     |
| SNP array | HXH          | pPO           | US      | 4.2E-04       | 0.674-1.000     |

1286 Note.: \* indicates admixture inferred to involve an ancestral population along the branch move in back in time from the modern representative.  
 1287 To simplify the table, when the same pair of modern populations occur multiple times (for example India v Europe and India v Europe\*), the pair  
 1288 with the lowest residual norm is shown.

1286  
 1287  
 1288  
 1289  
 1290  
 1291  
 1292  
 1293  
 1294  
 1295  
 1296  
 1297  
 1298  
 1299  
 1300  
 1301  
 1302  
 1303  
 1304  
 1305  
 1306  
 1307  
 1308  
 1309  
 1310  
 1311

1312 **Supplementary Table 8: Two-way admixture events identified by MixMapper for NGD for**  
 1313 **both SNP array and genome data.**

| Data Set  | Admixed Pop. | Branch1 (Br1) | Branch2 | Residual norm | Br1 admixture % |
|-----------|--------------|---------------|---------|---------------|-----------------|
| Genome    | NGD          | Europe        | Borneo  | 1.2E-05       | 0.769-0.854     |
| SNP array | NGD          | Por*          | InB     | 2.2E-04       | 0.891-1.000     |
| SNP array | NGD          | pSL*          | InB     | 2.4E-04       | 0.907-0.912     |
| SNP array | NGD          | pPO*          | InB     | 2.6E-04       | 0.905-0.926     |
| SNP array | NGD          | pSL*          | WLA     | 2.6E-04       | 0.954-1.000     |
| SNP array | NGD          | Por           | Vie     | 2.6E-04       | 0.893-0.912     |
| SNP array | NGD          | Fij           | Vie     | 2.7E-04       | 0.901-0.902     |
| SNP array | NGD          | Por           | WLA     | 2.8E-04       | 0.944-0.961     |
| SNP array | NGD          | Bos           | WLA     | 2.8E-04       | 0.949-1.000     |
| SNP array | NGD          | Bos           | InB     | 2.8E-04       | 0.862-0.928     |
| SNP array | NGD          | Por           | WLC     | 2.8E-04       | 0.954-1.000     |
| SNP array | NGD          | Por           | WLE     | 2.8E-04       | 0.926-0.951     |
| SNP array | NGD          | pSL*          | WLE*    | 2.9E-04       | 0.920-0.923     |
| SNP array | NGD          | Fij*          | InB     | 2.9E-04       | 0.884-0.911     |
| SNP array | NGD          | Bos           | WLE     | 2.9E-04       | 0.943-0.953     |
| SNP array | NGD          | pPO*          | WLE*    | 3.0E-04       | 0.885-0.934     |
| SNP array | NGD          | pPO*          | Vie     | 3.0E-04       | 0.866-0.887     |
| SNP array | NGD          | Fij           | WLE     | 3.0E-04       | 0.942-0.947     |
| SNP array | NGD          | Por           | US      | 3.3E-04       | 0.818-1.000     |
| SNP array | NGD          | Fij           | WLA     | 3.3E-04       | 0.943-0.954     |
| SNP array | NGD          | pPO           | WLA     | 3.7E-04       | 0.935-1.000     |
| SNP array | NGD          | pPO*          | WLC     | 3.7E-04       | 0.940-1.000     |
| SNP array | NGD          | pPO           | US      | 3.9E-04       | 0.739-0.796     |
| SNP array | NGD          | pPO           | Jackal  | 4.1E-04       | 0.944-1.000     |
| SNP array | NGD          | Bos           | Vie     | 4.2E-04       | 0.877-1.000     |

Note.: \* indicates admixture inferred to involve an ancestral population along the branch move in back in time from the modern representative. To simplify the table, when the same pair of modern populations occur multiple times (for example India v Europe and India v Europe\*), the pair with the lowest residual norm is shown.

1314  
 1315  
 1316  
 1317  
 1318  
 1319  
 1320  
 1321  
 1322  
 1323  
 1324  
 1325

1326 **Supplementary Table 9: Two-way admixture events identified by MixMapper for CTC for**  
 1327 **both SNP array and genome data.**

| Data Set  | Admixed Pop. | Branch1 (Br1) | Branch2   | Residual norm | Br1 admixture % |
|-----------|--------------|---------------|-----------|---------------|-----------------|
| Genome    | CTC          | Europe        | WLC       | 6.4E-06       | 0.930-1.000     |
| Genome    | CTC          | Europe        | 14-Borneo | 8.1E-06       | 0.803-0.876     |
| Genome    | CTC          | Europe        | WIS       | 8.7E-06       | 0.898-0.935     |
| Genome    | CTC          | Europe        | 17-WLC    | 9.4E-06       | 0.929-1.000     |
| SNP array | CTC          | Ira*          | WLE*      | 3.0E-05       | 0.757-1.000     |
| SNP array | CTC          | InJ*          | WLE*      | 4.3E-05       | 0.712-0.735     |
| SNP array | CTC          | InJ*          | InB*      | 4.4E-05       | 0.727-1.000     |
| SNP array | CTC          | pSA*          | Bos       | 4.7E-05       | 0.752-1.000     |
| SNP array | CTC          | Ira*          | WLE*      | 5.8E-05       | 0.780-0.856     |
| SNP array | CTC          | pIR*          | WLE*      | 5.9E-05       | 0.790-1.000     |
| SNP array | CTC          | I-O*          | InJ*      | 6.1E-05       | 0.509-1.000     |
| SNP array | CTC          | pSA*          | Por       | 7.1E-05       | 0.741-0.784     |
| SNP array | CTC          | pSA*          | pPO       | 7.9E-05       | 0.774-1.000     |
| SNP array | CTC          | I-O*          | Bos*      | 9.5E-05       | 0.567-1.000     |

Note.: \* indicates admixture inferred to involve an ancestral population along the branch move in back in time from the modern representative.  
 To simplify the table, when the same pair of modern populations occur multiple times (for example India v Europe and India v Europe\*), the pair with the lowest residual norm is shown.

1328  
 1329  
 1330  
 1331  
 1332  
 1333  
 1334  
 1335  
 1336  
 1337  
 1338  
 1339  
 1340  
 1341  
 1342  
 1343  
 1344  
 1345  
 1346  
 1347  
 1348  
 1349  
 1350  
 1351  
 1352  
 1353  
 1354  
 1355  
 1356  
 1357  
 1358  
 1359

1360 **Supplementary Table 10:  $f_4$ -ratio test on the form of the ratio between  $f_4(A,O; X,C)$  and**  
 1361  **$f_4(A,O; B, C)$ .**

| A        | B        | X          | C           | O          | alpha   | std.err | Z       |
|----------|----------|------------|-------------|------------|---------|---------|---------|
| Indian   | Portugal | HXH        | South China | Andean fox | 0.7561  | 0.0341  | 22.175  |
| Indian   | Portugal | HXH        | Vietnam     | Andean fox | 0.7778  | 0.0313  | 24.840  |
| Indian   | Portugal | NGD        | South China | Andean fox | 0.7340  | 0.0369  | 19.907  |
| Indian   | Portugal | NGD        | Vietnam     | Andean fox | 0.7576  | 0.0337  | 22.483  |
| Basenji  | India    | CTC        | Portugal    | Andean fox | -1.2248 | 0.4393  | -2.7880 |
| Basenji  | India    | CTC        | HXH         | Andean fox | 0.1852  | 0.0977  | 1.8960  |
| Lebanon  | Portugal | CTC        | India       | Andean fox | 0.1816  | 0.0369  | 4.9220  |
| Lebanon  | HXH      | CTC        | India       | Andean fox | 0.2436  | 0.0489  | 4.9870  |
| Portugal | HXH      | CTC        | India       | Andean fox | 0.3083  | 0.0402  | 7.6630  |
| Vietnam  | CTC      | wolf_India | wolf_Iran   | Andean fox | -0.0106 | 0.0095  | -1.1110 |
| Vietnam  | Portugal | wolf_India | wolf_Iran   | Andean fox | -0.0099 | 0.0089  | -1.1110 |

1362  
 1363  
 1364  
 1365  
 1366  
 1367  
 1368  
 1369  
 1370  
 1371  
 1372  
 1373  
 1374  
 1375  
 1376  
 1377  
 1378  
 1379  
 1380  
 1381  
 1382  
 1383  
 1384  
 1385  
 1386  
 1387  
 1388  
 1389  
 1390  
 1391  
 1392  
 1393  
 1394  
 1395  
 1396  
 1397  
 1398  
 1399  
 1400

1401 **Supplementary Table 11: Three-way admixture events identified by MixMapper for CTC**  
 1402 **for both SNP array and genome data.**

| Data Set  | Admixed Population | Mixed Population 1 | Branch3   | Residual norm | Branch 3 admixture % |
|-----------|--------------------|--------------------|-----------|---------------|----------------------|
| SNP array | CTC                | HXH                | I-O*      | 9.7E-05       | 0.220-0.225          |
| SNP array | CTC                | HXH                | pSA*      | 1.0E-04       | 0.125-0.264          |
| Genome    | CTC                | HXH                | 14-Borneo | 1.8E-05       | 0.722-0.832          |
| Genome    | CTC                | HXH                | 13-India  | 2.0E-05       | 0.139-0.372          |
| Genome    | CTC                | HXH                | WIS       | 2.2E-05       | 0.877-0.906          |

Note: \* indicates admixture inferred to involve an ancestral population along the branch move in back in time from the modern representative.

1403  
 1404  
 1405  
 1406  
 1407  
 1408  
 1409  
 1410  
 1411  
 1412  
 1413  
 1414  
 1415  
 1416  
 1417  
 1418  
 1419  
 1420  
 1421  
 1422  
 1423  
 1424  
 1425  
 1426  
 1427  
 1428  
 1429  
 1430  
 1431  
 1432  
 1433  
 1434  
 1435  
 1436  
 1437

1438  
1439

**Supplementary Table 12: *f<sub>4</sub>* statistics of the form F4(ancient,ancient, Wolf,AndeanFox). Significant values in bold.**

| Pop A      | Pop B      | Wolf               | Outgroup         | D-statistic   | Z-score      |
|------------|------------|--------------------|------------------|---------------|--------------|
| HXH        | CTC        | ChineseWolf        | AndeanFox        | 0.0102        | 2.32         |
| HXH        | CTC        | CroatianWolf       | AndeanFox        | 0.0034        | 0.778        |
| HXH        | CTC        | IberianWolf        | AndeanFox        | 0.0006        | 0.139        |
| HXH        | CTC        | IndianWolf         | AndeanFox        | -0.0042       | -0.966       |
| HXH        | CTC        | IranianWolf        | AndeanFox        | -0.0053       | -1.303       |
| HXH        | CTC        | IsraeliWolf        | AndeanFox        | 0.0052        | 1.087        |
| HXH        | CTC        | ItalianWolf        | AndeanFox        | 0.0014        | 0.279        |
| HXH        | CTC        | PortugeseWolf      | AndeanFox        | 0.0006        | 0.132        |
| <b>HXH</b> | <b>CTC</b> | <b>SpanishWolf</b> | <b>AndeanFox</b> | <b>0.0219</b> | <b>4.214</b> |
| HXH        | NGD        | ChineseWolf        | AndeanFox        | 0.0017        | 0.396        |
| HXH        | NGD        | CroatianWolf       | AndeanFox        | -0.0011       | -0.26        |
| HXH        | NGD        | IberianWolf        | AndeanFox        | -0.0059       | -1.222       |
| HXH        | NGD        | IndianWolf         | AndeanFox        | -0.0017       | -0.391       |
| HXH        | NGD        | IranianWolf        | AndeanFox        | -0.0023       | -0.515       |
| HXH        | NGD        | IsraeliWolf        | AndeanFox        | 0.0029        | 0.596        |
| HXH        | NGD        | ItalianWolf        | AndeanFox        | -0.0006       | -0.123       |
| HXH        | NGD        | PortugeseWolf      | AndeanFox        | -0.0117       | -2.332       |
| HXH        | NGD        | SpanishWolf        | AndeanFox        | -0.0034       | -0.678       |
| NGD        | CTC        | ChineseWolf        | AndeanFox        | 0.0086        | 1.897        |
| NGD        | CTC        | CroatianWolf       | AndeanFox        | 0.0043        | 0.973        |
| NGD        | CTC        | IberianWolf        | AndeanFox        | 0.0058        | 1.369        |
| NGD        | CTC        | IndianWolf         | AndeanFox        | -0.0026       | -0.622       |
| NGD        | CTC        | IranianWolf        | AndeanFox        | -0.0032       | -0.793       |
| NGD        | CTC        | IsraeliWolf        | AndeanFox        | 0.0026        | 0.568        |
| NGD        | CTC        | ItalianWolf        | AndeanFox        | 0.0019        | 0.386        |
| NGD        | CTC        | PortugeseWolf      | AndeanFox        | 0.0109        | 2.406        |
| <b>NGD</b> | <b>CTC</b> | <b>SpanishWolf</b> | <b>AndeanFox</b> | <b>0.0246</b> | <b>4.619</b> |

1440  
1441  
1442

1443 **Supplementary Table 13: Two-way admixture events identified by MixMapper for CTC**  
 1444 **and Afg for SNP array data when including HXH as a scaffold population.**

| Admixed Population | Branch1 | Branch2 | Residual norm | Admixture % |
|--------------------|---------|---------|---------------|-------------|
| CTC                | I-O*    | HXH     | 1.1E-04       | 0.483-0.601 |
| CTC                | pSA*    | HXH     | 1.0E-04       | 0.601-0.770 |
| CTC                | HXH     | WLE*    | 1.1E-04       | 0.640-0.725 |
| CTC                | HXH     | InB*    | 1.1E-04       | 0.613-0.706 |
| CTC                | Pal*    | HXH     | 2.2E-04       | 0.787-0.852 |
| CTC                | HXH     | Jackal  | 1.6E-04       | 0.947-1.000 |
| CTC                | HXH     | WLE     | 1.8E-04       | 0.927-0.934 |
| CTC                | HXH     | WLC     | 1.7E-04       | 0.940-0.947 |
| Afg                | pSA*    | Bos     | 4.5E-05       | 0.702-0.764 |
| Afg                | pSA*    | Por     | 4.6E-05       | 0.716-0.768 |
| Afg                | pSA*    | HXH     | 4.4E-05       | 0.660-1.000 |
| Afg                | Pal*    | I-O     | 5.4E-05       | 0.769-0.835 |
| Afg                | InJ*    | I-O     | 6.7E-05       | 0.904-0.930 |
| Afg                | Ira*    | I-O     | 6.2E-05       | 0.907-1.000 |
| Afg                | HXH*    | I-O     | 7.0E-05       | 0.881-0.899 |
| Afg                | Bos*    | I-O     | 7.5E-05       | 0.884-0.905 |
| Afg                | Ira*    | I-O     | 5.7E-05       | 0.840-1.000 |
| Afg                | Ira*    | Vie     | 7.6E-05       | 0.959-1.000 |
| Afg                | Ira*    | InB*    | 6.9E-05       | 0.925-0.936 |
| Afg                | pSA*    | Bos*    | 4.9E-05       | 0.684-1.000 |

1445  
 1446  
 1447  
 1448  
 1449  
 1450  
 1451  
 1452  
 1453  
 1454  
 1455  
 1456  
 1457  
 1458

1459 **Supplementary Table 14: Outlier  $f_4$  statistics for our best admixture graph fitting HXH,**  
 1460 **CTC, NGD, modern dogs and wolves.**

| Pop W      | Pop X      | Pop Y  | Pop Z | Fitted $f$ | Estimated $f$ | Difference | std.err | Z_score |
|------------|------------|--------|-------|------------|---------------|------------|---------|---------|
| Andean Fox | wolf_China | Europe | HXH   | 2.6E-04    | 2.6E-03       | 2.3E-03    | 7.5E-04 | 3.07    |
| Andean Fox | wolf_China | India  | HXH   | -1.2E-04   | 3.5E-03       | 3.6E-03    | 7.6E-04 | 4.73    |
| Andean Fox | wolf_China | India  | NGD   | -1.9E-04   | 2.8E-03       | 3.0E-03    | 7.9E-04 | 3.80    |
| Bornean    | India      | HXH    | NGD   | 3.2E-03    | 2.8E-04       | -2.9E-03   | 8.3E-04 | -3.51   |

1461  
 1462  
 1463  
 1464  
 1465  
 1466  
 1467  
 1468  
 1469  
 1470  
 1471  
 1472  
 1473  
 1474  
 1475  
 1476  
 1477  
 1478  
 1479  
 1480  
 1481  
 1482  
 1483  
 1484  
 1485  
 1486  
 1487  
 1488  
 1489  
 1490  
 1491  
 1492  
 1493  
 1494  
 1495  
 1496  
 1497



1498 **Supplementary Table 15: Parameter estimates in G-PhoCS analysis.** We used the tree of the  
 1499 form (((((boxer, Village\_Europe), Village\_India), Village\_ChinaS),((wolfY,IsraeliWolf),  
 1500 ChineseWolf)),GoldenJackal). Divergence time and population size estimates are scaled up by  
 1501  $1 \times 10^{-4}$ . When using Croatian wolf, we report the result using 16,434 loci. When using Indian  
 1502 wolf, we report the result using 5,000 randomly selected loci.

|                                      | Y=Croatian  |                   | Y=Indian    |                 | Dingo (instead of China_S),<br>Y=Croatian |                   |
|--------------------------------------|-------------|-------------------|-------------|-----------------|-------------------------------------------|-------------------|
|                                      | mean        | 95% CI            | mean        | 95% CI          | mean                                      | 95% CI            |
| <b>Divergence time</b>               |             |                   |             |                 |                                           |                   |
| Box, Europe                          | 0.0853      | (0.0576-0.1239)   | 0.1360      | 0.07136-0.2036  | 0.0774                                    | (0.0444-0.1019)   |
| (Box, Europe),Indian                 | 0.2137      | (0.1825-0.2386)   | 0.2111      | 0.1674-0.2472   | 0.1683                                    | (0.1425-0.2011)   |
| ((Box, Europe),Indian),<br>China_S   | 0.2786      | (0.2329-0.3184)   | 0.2545      | 0.2210-0.2863   | 0.5106                                    | (0.4913-0.5348)   |
| (Y,IsraeliWolf)                      | 0.5234      | (0.4912-0.5522)   | 0.4856      | 0.4351-0.5402   | 0.5336                                    | (0.5104-0.5535)   |
| (Y,IsraeliWolf),Chinese<br>Wolf      | 0.5237      | (0.4915-0.5526)   | 0.4893      | 0.4369-0.5468   | 0.534                                     | (0.5109-0.5538)   |
| (Dog,Wolf)                           | 0.5247      | (0.4926-0.5530)   | 0.4910      | 0.4384-0.5509   | 0.539                                     | (0.5177-0.5583)   |
| <b>Effective population<br/>size</b> |             |                   |             |                 |                                           |                   |
| Box                                  | 0.2357      | (0.1591-0.3369)   | 0.4217      | 0.2256-0.6329   | 0.2357                                    | (0.1591-0.3369)   |
| Europe                               | 6.6661      | (3.9935-10.2473)  | 5.8360      | 3.2223-9.0717   | 6.6661                                    | (3.9935-10.2473)  |
| Indian                               | 1.3976      | (1.1608-1.6241)   | 1.4559      | 1.1061-1.8082   | 1.3976                                    | (1.1608-1.6241)   |
| China_S                              | 1.8453      | (1.5546-2.1317)   | 1.5275      | 1.2452-1.8169   | 1.8453                                    | (1.5546-2.1317)   |
| ChineseWolf                          | 3.1825      | (2.9587-3.4114)   | 3.2977      | 2.9318-3.6799   | 3.1825                                    | (2.9587-3.4114)   |
| IsraeliWolf                          | 20.4963     | (17.3494-24.0356) | 16.1577     | 12.7658-20.1083 | 20.4963                                   | (17.3494-24.0356) |
| wolfY                                | 6.9477      | (6.3080-7.6399)   | 17.8693     | 14.1961-22.2976 | 6.9477                                    | (6.3080-7.6399)   |
| GoldenJackal                         | 9.0472      | (8.7730-9.3254)   | 9.4533      | 8.9287-9.9921   | 9.0472                                    | (8.7730-9.3254)   |
| Anc(Box, Europe)                     | 1.4153      | (0.8569-1.9452)   | 1.0577      | 0.2244-2.0301   | 1.4153                                    | (0.8569-1.9452)   |
| Anc((Box,<br>Europe),Indian)         | 1.3602      | (0.2464-2.3413)   | 1.1013      | 0.3578-2.4864   | 1.3602                                    | (0.2464-2.3413)   |
| Anc(Dog)                             | 1.5643      | (1.1890-2.0036)   | 1.5958      | 1.1872-2.0221   | 1.5643                                    | (1.1890-2.0036)   |
| Anc(Wolf1)                           | 0.0216      | (0.0143-0.0313)   | 0.1455      | 0.0104-0.3871   | 0.0216                                    | (0.0143-0.0313)   |
| Anc(Wolf)                            | 1.2131      | (0.0658-3.7675)   | 1.6395      | 0.1598-4.2191   | 1.2131                                    | (0.0658-3.7675)   |
| Anc(DW)                              | 17.8534     | (17.5605-18.1572) | 18.0963     | 17.6312-18.5731 | 17.8534                                   | (17.5605-18.1572) |
| <b>Total Migration rate</b>          |             |                   |             |                 |                                           |                   |
|                                      | <b>mean</b> | <b>95% CI</b>     | <b>mean</b> | <b>95% CI</b>   | <b>mean</b>                               | <b>95% CI</b>     |

|              |        |                 |        |               |        |                 |
|--------------|--------|-----------------|--------|---------------|--------|-----------------|
| Box->ISW     | 0.0003 | (0.0000-0.0009) | 0.0107 | 0.0006-0.0291 | 0.0016 | (0.0000-0.0081) |
| ISW->Box     | 0.0823 | (0.0540-0.1174) | 0.0446 | 0.0243-0.0783 | 0.0682 | (0.0461-0.1133) |
| Europe->ISW  | 0.0472 | (0.0303-0.0693) | 0.0000 | 0.0000-0.0000 | 0.0366 | (0.0221-0.0600) |
| ISW->Europe  | 0.072  | (0.0472-0.1025) | 0.0392 | 0.0203-0.0685 | 0.0704 | (0.0475-0.1174) |
| Indian->ISW  | 0.0116 | (0.0000-0.0475) | 0.1591 | 0.0739-0.2552 | 0.0125 | (0.0001-0.0472) |
| ISW->Indian  | 0.4729 | (0.3747-0.5910) | 0.0188 | 0.0001-0.1030 | 0.6741 | (0.5417-0.8132) |
| China_S->CHW | 0.0016 | (0.0001-0.0068) | 0.0059 | 0.0000-0.0259 | 0.0142 | (0.0011-0.0272) |
| CHW->China_S | 0.0299 | (0.0165-0.0437) | 0.0276 | 0.0034-0.0570 | 0.016  | (0.0024-0.0313) |
| ISW->GLJ     | 0.0629 | (0.0515-0.0737) | 0.0599 | 0.0430-0.0762 | 0.0621 | (0.0506-0.0735) |
| GLJ->ISW     | 0.0065 | (0.0044-0.0087) | 0.0000 | 0.0000-0.0000 | 0.0069 | (0.0049-0.0090) |
| AncDW->GLJ   | 0.7149 | (0.6424-0.7955) | 0.5693 | 0.4400-0.7002 | 0.7413 | (0.6655-0.8246) |
| GLJ->AncDW   | 0.0208 | (0.0134-0.0285) | 0.0509 | 0.0356-0.0674 | 0.0156 | (0.0099-0.0223) |
| Indian->IDW  | -      | -               | 0.0280 | 0.0001-0.1028 |        |                 |
| IDW->India   | -      | -               | 0.3414 | 0.2230-0.4802 |        |                 |

1503  
1504  
1505  
1506  
1507  
1508  
1509  
1510  
1511  
1512  
1513  
1514  
1515  
1516  
1517  
1518  
1519  
1520  
1521  
1522  
1523  
1524  
1525  
1526  
1527  
1528  
1529  
1530

1531 **Supplementary Table 16: Comparison of divergence time estimates from previous studies**  
 1532 **using G-PhoCS**

|                        | dog/wolf divergence (kyrs) |                        | Dog divergence(kyrs)   |                        |
|------------------------|----------------------------|------------------------|------------------------|------------------------|
| Studies                | $\mu=1 \times 10^{-8}$     | $\mu=4 \times 10^{-9}$ | $\mu=1 \times 10^{-8}$ | $\mu=4 \times 10^{-9}$ |
| Freedman <i>et al.</i> | 15.00                      | 37.50                  | 12.90                  | 32.25                  |
| Wang <i>et al.</i>     | 24.60                      | 61.50                  | 9.60                   | 24.00                  |
| Fan <i>et al.</i>      | 11.70                      | 29.25                  | -                      | -                      |

1533 Note,  $\mu$  is in units of per base per generation, assuming a generation time of 3 years

1534  
 1535  
 1536  
 1537  
 1538  
 1539  
 1540  
 1541  
 1542  
 1543  
 1544  
 1545  
 1546  
 1547  
 1548  
 1549  
 1550  
 1551  
 1552  
 1553  
 1554  
 1555  
 1556  
 1557  
 1558  
 1559  
 1560  
 1561  
 1562  
 1563  
 1564  
 1565  
 1566  
 1567

1568 **Supplementary Table 17: Jackknife estimates and confidence interval of the ratio of the**  
 1569 **number of SNPs.** Estimates where i) a European village dog and dogX have the derived allele  
 1570 and an Indian sample has the ancestral allele versus ii) a European and Indian village dog have  
 1571 the derived allele and dogX has the ancestral allele.

| <b>dogX</b> | <b>Jackknife Estimates</b> | <b>Standard Deviation</b> | <b>Confidence Interval</b> |
|-------------|----------------------------|---------------------------|----------------------------|
| Boxer       | 1.533886                   | 0.020438                  | 1.513448-1.554324          |
| HXH         | 1.201485                   | 0.015546                  | 1.185939-1.217031          |
| NGD         | 1.212794                   | 0.017810                  | 1.194984-1.230604          |

1572  
 1573  
 1574  
 1575  
 1576  
 1577  
 1578  
 1579  
 1580  
 1581  
 1582  
 1583  
 1584  
 1585  
 1586  
 1587  
 1588  
 1589  
 1590  
 1591  
 1592  
 1593  
 1594  
 1595  
 1596  
 1597  
 1598  
 1599  
 1600  
 1601  
 1602  
 1603  
 1604  
 1605  
 1606

1607 **Supplementary Table 18: CanFam3.1 coordinates, IDs, and length of putative**  
 1608 **domestication loci first defined in Axelsson *et al.*** For each window, the number of SNPs from  
 1609 our dataset with and without minor allele frequency filtration is provided.

| Chrom. | Start Position | End Position | Window ID | Window Length (bp) | No. SNPs (Unfiltered) | No. SNPs (0.05 < MAF < 0.49) |
|--------|----------------|--------------|-----------|--------------------|-----------------------|------------------------------|
| chr1   | 2515609        | 3315787      | FST_1     | 800178             | 1506                  | 492                          |
| chr1   | 46572801       | 46874590     | FST_2     | 301789             | 483                   | 158                          |
| chr1   | 63560427       | 63760428     | FST_3     | 200001             | 680                   | 234                          |
| chr1   | 79948274       | 80148387     | FST_4     | 200113             | 559                   | 180                          |
| chr3   | 15326158       | 15626159     | FST_6     | 300001             | 429                   | 133                          |
| chr3   | 18623349       | 18823350     | FST_7     | 200001             | 371                   | 116                          |
| chr3   | 32064283       | 32261994     | FST_8     | 197711             | 348                   | 115                          |
| chr4   | 14494337       | 14694347     | FST_9     | 200010             | 638                   | 183                          |
| chr4   | 40803259       | 41001116     | FST_10    | 197857             | 269                   | 111                          |
| chr6   | 24980113       | 25280253     | FST_11    | 300140             | 743                   | 236                          |
| chr6   | 46854109       | 47454177     | FST_12    | 600068             | 1231                  | 540                          |
| chr6   | 53253174       | 53453184     | FST_13    | 200010             | 437                   | 124                          |
| chr7   | 24632212       | 25033464     | FST_14    | 401252             | 456                   | 114                          |
| chr8   | 27696699       | 27896700     | FST_15    | 200001             | 655                   | 244                          |
| chr10  | 2714704        | 2914705      | FST_16    | 200001             | 364                   | 89                           |
| chr10  | 3615192        | 4015195      | FST_17    | 400003             | 891                   | 306                          |
| chr11  | 47269655       | 47669725     | FST_19    | 400070             | 1037                  | 371                          |
| chr14  | 7244540        | 7543124      | FST_20    | 298584             | 373                   | 115                          |
| chr15  | 5093547        | 5393613      | FST_21    | 300066             | 311                   | 83                           |
| chr15  | 35192648       | 35392649     | FST_22    | 200001             | 338                   | 120                          |
| chr16  | 6828779        | 7342805      | FST_23    | 514026             | 1448                  | 627                          |
| chr17  | 38657285       | 38857286     | FST_24    | 200001             | 528                   | 196                          |
| chr18  | 414503         | 1414626      | FST_25    | 1000123            | 2415                  | 649                          |
| chr18  | 3217604        | 4718037      | FST_26    | 1500433            | 3533                  | 1118                         |
| chr19  | 37683164       | 37883157     | FST_27    | 199993             | 481                   | 184                          |
| chr22  | 19995752       | 20192912     | FST_29    | 197160             | 348                   | 151                          |
| chr25  | 1015698        | 1515729      | FST_30    | 500031             | 816                   | 282                          |
| chr28  | 6403026        | 6603027      | FST_32    | 200001             | 288                   | 84                           |
| chr28  | 9202946        | 9502947      | FST_33    | 300001             | 694                   | 224                          |
| chr37  | 6915094        | 7115095      | FST_35    | 200001             | 428                   | 168                          |

1610 **Supplementary Table 19: Proportion of dogs and outgroups (wolves, jackal, coyotes, and**  
 1611 **fox) that exhibit reference (breed dog) allele proportions over 0.95.** Windows with less than  
 1612 0.25 of dogs and greater than 0.75 of outgroup proportions are considered as passing. Reference  
 1613 allele proportions per window are provided for HXH, CTC, and NGD. Ancient sample  
 1614 proportions < 0.95 are indicated in bold font (i.e. exhibiting wild-like genotypes). Window  
 1615 marked with asterisk represents data from less variable subset of selection window.

| FST Window Identifier | PASS/FAIL | Window SNP Count | Proportion of Dogs with Ref. Allele Counts Over Threshold | Proportion of Wolves + Outgroups with Ref. Allele Counts Over Threshold | HXH Ref. Allele Proportion | CTC Ref. Allele Proportion | NGD Ref. Allele Proportion |
|-----------------------|-----------|------------------|-----------------------------------------------------------|-------------------------------------------------------------------------|----------------------------|----------------------------|----------------------------|
| FST_1                 | PASS      | 1506             | 0.025                                                     | 1.000                                                                   | 0.989                      | 0.993                      | 0.984                      |
| FST_2                 | PASS      | 483              | 0.288                                                     | 1.000                                                                   | 0.990                      | 0.995                      | 0.994                      |
| FST_3                 | PASS      | 680              | 0.213                                                     | 1.000                                                                   | 0.980                      | 0.988                      | 0.999                      |
| FST_4                 | PASS      | 559              | 0.050                                                     | 1.000                                                                   | 0.997                      | <b>0.902</b>               | 0.997                      |
| FST_6                 | FAIL      | 429              | 0.350                                                     | 1.000                                                                   | 0.992                      | 0.972                      | 0.962                      |
| FST_7                 | FAIL      | 371              | 0.250                                                     | 1.000                                                                   | 0.991                      | 0.992                      | 0.911                      |
| FST_8                 | FAIL      | 348              | 0.388                                                     | 0.895                                                                   | 0.970                      | 0.986                      | 0.977                      |
| FST_9                 | PASS      | 638              | 0.125                                                     | 0.947                                                                   | 0.969                      | 0.972                      | 0.991                      |
| FST_10                | PASS      | 269              | 0.125                                                     | 1.000                                                                   | 0.994                      | <b>0.918</b>               | 0.996                      |
| FST_11                | PASS      | 743              | 0.175                                                     | 1.000                                                                   | 0.994                      | 0.996                      | 0.999                      |
| FST_12                | PASS      | 1231             | 0.238                                                     | 1.000                                                                   | 0.956                      | <b>0.850</b>               | <b>0.851</b>               |
| FST_13                | PASS      | 437              | 0.138                                                     | 1.000                                                                   | <b>0.932</b>               | 0.995                      | 1.000                      |
| FST_14                | FAIL      | 456              | 0.400                                                     | 1.000                                                                   | 0.891                      | 0.935                      | 0.876                      |
| FST_15                | FAIL      | 655              | 0.388                                                     | 1.000                                                                   | 0.969                      | 0.989                      | 0.976                      |
| FST_16                | FAIL      | 364              | 0.313                                                     | 0.737                                                                   | 0.985                      | 0.973                      | 0.992                      |
| FST_17                | PASS      | 891              | 0.088                                                     | 1.000                                                                   | 0.993                      | <b>0.921</b>               | 0.998                      |
| FST_19                | PASS      | 1037             | 0.163                                                     | 0.947                                                                   | 0.976                      | 0.982                      | 0.993                      |
| FST_20                | PASS      | 373              | 0.313                                                     | 1.000                                                                   | 0.981                      | 0.976                      | <b>0.899</b>               |
| FST_21                | PASS      | 311              | 0.063                                                     | 0.895                                                                   | 0.994                      | <b>0.875</b>               | 0.994                      |
| FST_22                | FAIL      | 338              | 0.438                                                     | 1.000                                                                   | 0.991                      | 0.947                      | 0.997                      |
| FST_23*               | PASS      | 1448             | 0.438                                                     | 1.000                                                                   | 0.994                      | 0.996                      | 0.997                      |
| FST_24                | FAIL      | 528              | 0.588                                                     | 1.000                                                                   | 0.976                      | 0.951                      | 0.975                      |
| FST_25                | PASS      | 2415             | 0.038                                                     | 1.000                                                                   | 0.992                      | 0.992                      | 0.998                      |
| FST_26                | PASS      | 3533             | 0.138                                                     | 1.000                                                                   | 0.983                      | 0.993                      | 0.997                      |
| FST_27                | FAIL      | 481              | 0.688                                                     | 1.000                                                                   | 0.868                      | 0.963                      | 0.919                      |
| FST_29                | FAIL      | 348              | 0.788                                                     | 1.000                                                                   | 0.974                      | 0.902                      | 0.934                      |
| FST_30                | FAIL      | 816              | 0.263                                                     | 1.000                                                                   | 0.991                      | 0.989                      | 0.996                      |
| FST_32                | FAIL      | 288              | 0.438                                                     | 1.000                                                                   | 0.995                      | 0.998                      | 0.938                      |
| FST_33                | PASS      | 694              | 0.088                                                     | 1.000                                                                   | 0.986                      | <b>0.891</b>               | 0.996                      |
| FST_35                | PASS      | 428              | 0.138                                                     | 1.000                                                                   | 0.979                      | 0.986                      | 0.996                      |

1616  
 1617  
 1618  
 1619

1620 **Supplementary Table 20: Miseq results for HXH.**

| Sample | Raw fastq reads | Trimmed fastq reads | Aligned reads to CanFam3.1 | Reads following samtools rmdup | Aligned Reads following rmdup | Aligned following rmdup (%) | Aligned Reads following QC (-q30) | Aligned following QC (%) |
|--------|-----------------|---------------------|----------------------------|--------------------------------|-------------------------------|-----------------------------|-----------------------------------|--------------------------|
| HXH    | 322,579         | 318,759             | 193,007                    | 318,543                        | 192,791                       | 60.52                       | 151,978                           | 47.68                    |

1621  
 1622  
 1623  
 1624  
 1625  
 1626  
 1627  
 1628  
 1629  
 1630  
 1631  
 1632  
 1633  
 1634  
 1635  
 1636  
 1637  
 1638  
 1639  
 1640  
 1641  
 1642  
 1643  
 1644  
 1645  
 1646  
 1647  
 1648  
 1649  
 1650  
 1651  
 1652  
 1653  
 1654  
 1655  
 1656  
 1657  
 1658  
 1659  
 1660  
 1661

1662  
1663

**Supplementary Table 21: MiSeq results of controls.**

| Control              | Raw fastq reads | Trimmed fastq reads | Aligned reads to CanFam3 | Reads following samtools rmdup | Aligned Reads following rmdup | Aligned following rmdup (%) | Aligned Reads following QC (-q30) | Aligned following QC (%) |
|----------------------|-----------------|---------------------|--------------------------|--------------------------------|-------------------------------|-----------------------------|-----------------------------------|--------------------------|
| Air Control          | 467             | 396                 | 3                        | 396                            | 3                             | 0.76                        | 3                                 | 0.76                     |
| Water Control        | 578             | 523                 | 3                        | 523                            | 3                             | 0.57                        | 1                                 | 0.19                     |
| Extraction Control 1 | 886             | 786                 | 18                       | 786                            | 18                            | 2.29                        | 2                                 | 0.25                     |
| Extraction Control 2 | 552             | 512                 | 3                        | 512                            | 3                             | 0.59                        | 2                                 | 0.39                     |
| Library Control 1    | 155             | 148                 | 0                        | 148                            | 0                             | 0.00                        | 0                                 | 0.00                     |
| Library Control 2    | 848             | 540                 | 2                        | 540                            | 2                             | 0.37                        | 2                                 | 0.37                     |
| PCR Control 1        | 116             | 115                 | 1                        | 115                            | 1                             | 0.87                        | 1                                 | 0.87                     |
| PCR Control 2        | 635             | 610                 | 0                        | 610                            | 0                             | 0.00                        | 0                                 | 0.00                     |

1664  
1665  
1666  
1667  
1668  
1669  
1670  
1671  
1672  
1673  
1674  
1675  
1676  
1677  
1678  
1679  
1680  
1681  
1682  
1683  
1684  
1685  
1686  
1687  
1688  
1689  
1690  
1691  
1692  
1693  
1694  
1695  
1696  
1697  
1698



1699 **Supplementary Table 22: Qubit measurements of all sequenced libraries and**  
 1700 **corresponding blank controls of CTC.**

| Extraction_sample or blank | Extraction.Library | Qubit (ng/μl) |
|----------------------------|--------------------|---------------|
| 1_Kir20                    | 1.1                | 5.83          |
| 1_milling blank            | 1                  | 0.20          |
| 1_extraction blank         | 1                  | 0.17          |
| 1_library blank            |                    | 0.17          |
| 2_Kir20                    | 2.1                | 5.43          |
| 2_Kir20                    | 2.2                | 14.3          |
| 2_Kir20                    | 2.3                | 8.99          |
| 2_extraction blank         | 2                  | 0.47          |

1701  
 1702  
 1703  
 1704  
 1705  
 1706  
 1707  
 1708  
 1709  
 1710  
 1711  
 1712  
 1713  
 1714  
 1715  
 1716  
 1717  
 1718  
 1719  
 1720  
 1721  
 1722  
 1723  
 1724  
 1725  
 1726  
 1727  
 1728

1729 **Supplementary Table 23: The range of parameters we sampled.  $\theta$  and  $\tau$  estimates were**  
 1730 **based on G-PhoCS results and alpha value was based on  $f_4$ -ratio analysis.**

| Parameter  | Uniform range                                             |
|------------|-----------------------------------------------------------|
| $\theta_1$ | $(0.86 \times 10^{-4}, 1.95 \times 10^{-4})$              |
| $\theta_2$ | $(0.25 \times 10^{-4}, 2.34 \times 10^{-4})$              |
| $\tau_0$   | $(5.76 \times 10^{-6}, 1.24 \times 10^{-5})$              |
| $\tau_2$   | $(1.83 \times 10^{-5}, 2.39 \times 10^{-5})$              |
| $\tau_3$   | $(2.33 \times 10^{-5}, 3.18 \times 10^{-5})$              |
| $\alpha$   | (0.19,0.28) for HXH<br>(0.20,0.30) for NGD<br>0 for Boxer |

1731  
 1732  
 1733  
 1734  
 1735  
 1736  
 1737  
 1738  
 1739  
 1740  
 1741  
 1742  
 1743  
 1744  
 1745  
 1746  
 1747  
 1748  
 1749  
 1750  
 1751  
 1752  
 1753  
 1754  
 1755  
 1756  
 1757  
 1758  
 1759  
 1760

1761 **Supplementary Table 24: D-statistics supporting the migration band setting used in G-**  
 1762 **PhoCS.**

| Pop A        | Pop B        | Pop C        | Outgroup   | f4      | Z-score |
|--------------|--------------|--------------|------------|---------|---------|
| wolf_Israeli | wolf_China   | Boxer        | Andean fox | 0.0389  | 6.628   |
| wolf_Israeli | wolf_Croatia | Boxer        | Andean fox | 0.0368  | 6.390   |
| wolf_China   | wolf_Croatia | South China  | Andean fox | 0.0139  | 4.079   |
| wolf_Israeli | wolf_China   | India        | Andean fox | 0.0366  | 7.474   |
| wolf_Israeli | wolf_Croatia | India        | Andean fox | 0.0355  | 7.278   |
| wolf_Israeli | wolf_India   | India        | Andean fox | 0.0600  | 11.115  |
| wolf_Israeli | wolf_China   | Portugal     | Andean fox | 0.0378  | 6.744   |
| wolf_Israeli | wolf_Croatia | Portugal     | Andean fox | 0.0363  | 6.602   |
| Boxer        | South China  | wolf_China   | Andean fox | -0.0129 | -3.890  |
| India        | South China  | wolf_China   | Andean fox | -0.0170 | -7.902  |
| Portugal     | South China  | wolf_China   | Andean fox | -0.0143 | -5.187  |
| Boxer        | South China  | wolf_Israeli | Andean fox | 0.0342  | 9.086   |
| India        | South China  | wolf_Israeli | Andean fox | 0.0258  | 10.603  |
| Portugal     | South China  | wolf_Israeli | Andean fox | 0.0311  | 9.812   |

1763

1764

1765

1766

1767

1768

## 1769 **Supplementary Note 1: Archaeological background**

### 1770 Herxheim (HXH)

1771 The internal ditch structure of the Herxheim site contains a significant amount of faunal remains  
1772 that are mainly characterized by an important representation of dogs. The >250 remains of this  
1773 species constitute the largest bone series of Early Neolithic dogs in western Europe. The pottery  
1774 associated with the human and animal bones in this concentration date to the youngest phase of  
1775 the Linear Pottery Culture (LBK), of which all the finds in the settlement ditches belong.  
1776

1777 The dog bone series belong to all skeletal parts but with an over-representation of cranial  
1778 fragments compared to rachis and limbs. Mandibles, which correspond to the best represented  
1779 skeletal remains, attest the presence of at least 13 individuals. The distribution of the dog bones  
1780 within the pit is characterized by concentrations of anatomically related elements (skull and  
1781 cervical vertebrae, sections of spine and limb fragments). The bones are notably quite complete,  
1782 and carry both burn and meat carving marks. This suggests that the animals were prepared by  
1783 various procedures for consumption (i.e. carving in quarters, cooking by fire roasting). The dog  
1784 remains were found mixed with remains from other animals and with abundant human remains.  
1785 The latter were systematically and extensively fragmented and exhibit numerous marks of  
1786 dislocation, meat carving and scraping, which are typical for cannibalism<sup>1</sup>.  
1787

1788 The sample used in this study, named HXH from this point on, ([Supplementary Figure 1](#))  
1789 belongs to a concentration of findings (K 3, rescue excavation) from the southern part of the  
1790 inner ditch. Carbon dating estimated a date of 5,223-5,040 BCE cal. Only a single petrous bone  
1791 from this dog was available. However, the biometrics of dog remains at the site in general (width  
1792 and length of bones and teeth) are clearly distinct, with smaller values compared to those of  
1793 wolves from the same Neolithic period. Namely, the modest sizes of the first molars are within  
1794 the range of those of other Neolithic dogs rather than of wolves. Measurements of available long  
1795 bones, which allow estimation of a height, provide values of around 46 cm. These values are in  
1796 agreement with dogs from other Early Neolithic sites, but are somewhat larger than values from  
1797 more recent Neolithic sites<sup>2</sup>.

### 1798 Kirschbaumhöhle (CTC)

1799 The Kirschbaumhöhle (Cherry Tree Cave), situated near Forchheim in the karst landscape of  
1800 Northern Franconian low mountain range, was discovered in November 2010<sup>3</sup>. This quite small-  
1801 scale vertical cave is divided into several parts: the vertical Entry Shaft, the steep Descent Tube,  
1802 the very low and fissured Bone Chamber, located about 6 m below ground level, and the more  
1803 accessible Sinter Chamber.  
1804

1805 Visible finds lying on the surface of the cave consisted of six human skulls, other human bones  
1806 and the remains of domestic and wild animals. Terrestrial 3D scanning was used to obtain the  
1807 exact position of each bone. All work inside the cave was performed with protective clothing to  
1808 avoid contaminating the prehistoric bones with modern DNA. In all, 188 bones with a weight of  
1809 about 10 kg have been recovered thus far. A large series of radiocarbon dates demonstrate that  
1810 the human and animal remains belong to at least six prehistoric periods: the Younger Neolithic  
1811 (presumably Michelsberg Culture) between 3,800 and 3,650 BCE cal., the early End Neolithic

1812 (presumably Corded Ware Culture) between 2,900 and 2,630 BCE cal., the middle End Neolithic  
1813 (Corded Ware Culture or Bell Beaker Culture) between 2,580 and 2,460 BCE cal., the late End  
1814 Neolithic (Corded Ware Culture or Bell Beaker Culture) between 2,340 and 2,140 BCE cal., the  
1815 Early Bronze Age between 1,800 and 1,700 BCE cal. and the middle Iron Age (Late  
1816 Hallstatt/Early Latène) between 580 and 420 BCE cal.

1817  
1818 The dog cranium examined in this study (from this point on referred to as CTC) ([Supplementary](#)  
1819 [Figure 2](#)) was found in the Bone Chamber near two human skulls which dated to the early End  
1820 Neolithic period ([Supplementary Figure 27](#)), presumably connected with the Corded Ware  
1821 Culture. The radiocarbon date of the dog skull coincides with them and reveals that it got into the  
1822 cave between 2,900 and 2,632 BCE cal. CTC was adult and by the state of tooth abrasion, older  
1823 than 5 years. The measurements of the skull show a similarity to the so-called Torfhund (*Canis*  
1824 *familiaris palustris*) which is comparable to the modern Spitz breed <sup>4</sup>. This dog type is also  
1825 known from lakeside settlements of Corded Ware Culture in Switzerland <sup>5</sup>.

1826  
1827

1828

1829

## 1830 **Supplementary Note 2: DNA Isolation and screening of HXH**

### 1831 Sample preparation

1832 Note that in initial stages of the project sample HXH had the identifier HXH10a. The petrous  
1833 part of the temporal bone of sample HXH was prepared in clean-room facilities dedicated to  
1834 ancient DNA at Trinity College Dublin (Ireland). Researchers wore body suits, face masks,  
1835 gloves and shoe covers to minimize potential contamination from outside. Surfaces and tools  
1836 were cleaned using a 5% bleach solution at regular intervals.

1837  
1838 The bone sample was decontaminated using UV exposure for 15 minutes on both sides, followed  
1839 by surface cleaning with a standard dentist drill and drill bit. A sample of the bone was then  
1840 excised using a dremel engraving cutter (saw), and which was reduced to a fine powder using a  
1841 Mixer Mill (MM 400, Retsch). Two environmental controls (an air control and a water control)  
1842 were also prepared, to estimate the possible contaminants in the working environment.

### 1843 DNA extraction

1844 Approximately 120 mg of powdered bone was used in DNA extraction. The protocol followed  
1845 was introduced by <sup>6</sup> and subsequently modified by <sup>7</sup>. Two tubes each containing 1 ml H<sub>2</sub>O were  
1846 included as extraction controls, and subjected to identical treatment as bone powder samples.

1847  
1848 One ml of lysis buffer (1M Tris-HCl; 2% SDS; 0.5M EDTA; 0.65 U/ml Proteinase K) was  
1849 prepared and transferred to sample tubes, which were incubated in a thermocycler for 24 hours at  
1850 37°C. Samples were then spun down at 13,300 rpm and the lysis buffer removed. 1 ml fresh  
1851 extraction buffer was added and sample tubes incubated again under the same conditions. This  
1852 was repeated again for a total of three extractions. After spindown of the final extraction, the  
1853 supernatant was transferred to Amicon filters (Amicon Ultra-4 Centrifugal Filter Unit 30 kDa)  
1854 with 3 ml 1x Tris-EDTA was added to each filter. Samples were then spun down to the 250 µl  
1855 mark, and the flow-through discarded. Fresh 3 ml 1x Tris-EDTA was added and tubes spun  
1856 down to the 100 µl mark. This final 100 µl was then transferred to a MinElute Silica column  
1857 (MinElute PCR Purification Kit, Qiagen, Hilden, Germany). Purification was completed as per  
1858 the manufacturer's instructions. DNA was eluted in 40 µl EBT (Elution Buffer with 0.05%  
1859 Tween).

### 1860 Library preparation

1861 Two Next Generation Sequencing (NGS) libraries were constructed using 16.25 µl of DNA  
1862 extract each. Libraries were constructed as described in <sup>8</sup> with modifications from <sup>9</sup>. Two blanks  
1863 of 16.25 µl H<sub>2</sub>O were included.

1864  
1865 Briefly, NEB Next End Repair Module (New England BioLab Inc.) with reagent volumes scaled  
1866 to 70% (final reaction volume 70 µl) was used to perform blunt-end repair. The reaction mix was  
1867 incubated for 15 minutes at 25°C, then 5 minutes at 5°C. This was followed by Qiagen MinElute  
1868 PCR purification following manufacturer's instructions and elution in 20 µl EBT. Adaptor  
1869 ligation using T4 DNA ligase was performed on the elute, followed by MinElute purification as  
1870 described previously. The elute was then subjected to adaptor fill-in, with the addition of a heat

1871 inactivation step (20 minutes at 80°C) in place of additional purification.

1872

1873 Amplification was performed using 3 µl fill-in product, 1 µl of a unique index oligo (5 µM) and  
1874 21 µl of amplification master mix composed of 20.5 µl AccuPrime Pfx Polymerase (Invitrogen)  
1875 and 0.5 µl primer IS4 (10 µM). Amplification was performed for 13 cycles for a single PCR used  
1876 for MiSeq screening, and for 12 cycles for an additional 19 PCRs used for HiSeq sequencing in a  
1877 dedicated ancient DNA PCR room (95°C for 5 min; 11-12 x 95°C for 15 sec, 60°C for 30 sec,  
1878 68°C for 30 sec; 68°C for 5 min). Two blank controls (3 µl H<sub>2</sub>O) were included. Following  
1879 amplification, all individual PCRs were purified using MinElute columns as described above and  
1880 eluted in 10 µl EB. The 19 PCRs used for HiSeq sequencing were pooled equimolarly and then  
1881 re-purified with Agencourt® AMPure® XP beads (Beckmann Coulter) to reduce primer dimers.  
1882 DNA quantification was performed using an Agilent 2200 TapeStation using a D1000  
1883 ScreenTape (Agilent Technologies) and Qubit® Fluorometric quantitation (dsDNA HS assay,  
1884 Invitrogen).

### 1885 MiSeq screening

1886 20 ng of the purified PCR product for HXH were included on a pooled sequencing run with  
1887 spiked-in control libraries (1 µl) on an Illumina MiSeq platform (Trinity Genome Sequencing  
1888 Laboratory, Trinity College Dublin, Ireland) using 70 bp single-end sequencing. The resulting  
1889 reads were trimmed using Cutadapt v1.6<sup>10</sup>, discarding reads less than 30 bp in length and  
1890 allowing for a minimum length of 1 between the read and adaptor (cutadapt -a  
1891 AGATCGGAAGAGCACACGTCTGAACTCCAGTCAC -O 1 -m 30 ). Reads were then aligned  
1892 to a collection of genomes using bowtie2<sup>11</sup> and fastq screen (Babraham Bioinformatics)  
1893 to determine species identity. Based on affinity of reads to the *Canis familiaris* reference genome  
1894 in the fastq screening (Supplementary Figure 28), trimmed fastq files were aligned to CanFam3.1  
1895 using bwa aln<sup>12</sup> with seeding disabled (bwa aln -l 1000). After duplicate removal,  
1896 length and quality filtering, 47.68% of reads mapped the dog genome (Supplementary Table 20).

### 1897 Blank controls

1898 Prepared control libraries (environment, extraction, library and PCR) were quantitatively  
1899 analyzed with the TapeStation 2200 and did not display substantial levels of DNA  
1900 (Supplementary Figure 29). Signals at approximately the 60 bp range in control libraries likely  
1901 reflects index dimerization.

1902

1903 Control libraries were included in a pooled MiSeq sequencing run and were aligned to CanFam3  
1904 to directly estimate potential contamination. The number of reads aligning to CanFam3  
1905 following QC for each control library was small (< 1%; Supplementary Table 21) relative to the  
1906 those aligning in the HXH library.

1907

## 1908 **Supplementary Note 3: DNA Isolation and screening of CTC**

### 1909 Sample preparation

1910 Note that in initial stages of the project sample CTC had the identifier Kir20. Sample preparation  
1911 was conducted in dedicated ancient DNA facilities of the Palaeogenetics Group at Johannes  
1912 Gutenberg-University Mainz under strict rules for contamination prevention as described in  
1913 Bramanti *et al.*<sup>13</sup>. The petrous bone was extracted from the skull using a rotary saw (Electer  
1914 Emax IH-300, MAFRA) and UV-irradiated for 45 min from two sides. The surface and  
1915 spongy parts were mechanically removed using a sandblaster (P-G 400, Harnisch & Rieth).  
1916 The most dense parts remaining of the petrous bone were again UV-irradiated for 45 min from  
1917 each side. The sample was then pulverised using a mixer mill (MM200, Retsch).

### 1918 DNA extraction

1919 DNA was independently extracted twice. For the first extraction, 0.3 g of bone powder was  
1920 incubated for 45 min at 37°C on a rocking shaker in a decalcification and digestion solution  
1921 containing 1 ml of EDTA (0.5 M, pH8; Ambion®, Applied Biosystems), 250 µl of N-  
1922 Laurylsarcosine (0.5 %, Merck) and 30 µl of Proteinase K (18 U, Roche). The sample was spun  
1923 down and the supernatant removed. For the second extraction, 0.5 g of bone powder was used  
1924 and the first round of incubation was completed in 30 min. The remaining bone powder of both  
1925 samples was again incubated in 6 ml of EDTA, 250µl of N-Laurylsarcosine and 30 µl of  
1926 Proteinase K on a rocking shaker for two days at 37°C. Further steps were performed according  
1927 to Scheu *et al.*<sup>14</sup> on the basis of a phenol-chloroform protocol with subsequent washing and  
1928 concentration to 200 µl of extract using 50 kDA 50 ml Amicons (Millipore).

### 1929 Library preparation

1930 50 µl of the first extract were transformed into one NGS library (library 1.1), and 60 µl of the  
1931 second extract were transformed into three libraries (2.1, 2.2 and 2.3; 20 µl of extract diluted  
1932 with 30 µl of water each). Library preparation followed the protocol in Meyer and Kircher<sup>8</sup> with  
1933 slight modifications as described in Hofmanová *et al.*<sup>15</sup>. Double indexing was performed  
1934 according to Kircher *et al.*<sup>16</sup> using the index sequences from Illumina's NexteraXT Kit v2.  
1935

1936 Libraries were amplified in 3 parallel PCRs using AmpliTaq Gold® DNA polymerase (Applied  
1937 Biosystems) and 16 cycles for library 1.1, and 12 cycles for libraries 2.1, 2.2 and 2.3.

1938 The amplified library 1.1 was purified using the Stratec MSB® Spin PCRapace kit (Stratec  
1939 Biomedical AG), and all 3 PCRs were eluted together in 34 µl of EB. The 9 PCRs of libraries  
1940 2.1, 2.2 and 2.3 were purified with Agencourt® AMPure® XP beads (Beckmann Coulter) and all  
1941 3 per library eluted together in 12 µl of EB. The resulting 4 samples were subsequently  
1942 quantified with both, Qubit® Fluorometric quantitation (dsDNA HS assay, Invitrogen) and  
1943 Agilent 2100 Bioanalyzer System (HS, Agilent Technologies).

### 1944 MiSeq screening

1945 The amplified library of the first extract was sequenced in a pool with other libraries from  
1946 different projects on the Miseq at StarSEQ GmbH (Mainz, Germany). The resulting 1,321,372  
1947 50 bp single-end reads were processed using the pipeline described in Hofmanová *et al.*<sup>15</sup>. The



1948 reads were aligned against the dog reference genome CanFam3 with the mitochondrial genome  
1949 replaced by GenBank U96639. After duplicate removal, length and quality filtering, 61.5% of  
1950 reads mapped the dog genome.

#### 1951 Blank controls

1952 Blank controls were processed during milling (as described in Scheu *et al.* <sup>14</sup>), extraction and  
1953 library preparation. Amplified libraries of the blank controls were quantified with Qubit®  
1954 Fluorometric quantitation (dsDNA HS assay, Invitrogen) and Agilent 2100 Bioanalyzer System  
1955 (HS, Agilent Technologies). None of the blank controls showed signs for amplification at the  
1956 respective fragment lengths of the samples that were processed in parallel, and the Qubit  
1957 measurements revealed on average 94% lower values in the blanks compared to the sample (see  
1958 [Supplementary Table 22](#)). The remaining measured molecules are most likely reflecting the  
1959 dimer peaks visible in the Bioanalyzer measurements of the blank controls ([Supplementary](#)  
1960 [Figure 30](#)).

1961

1962

1963

## 1964 **Supplementary Note 4: HiSeq Sequencing and Read Processing**

### 1965 HXH and CTC

1966 Combinations of various genomic libraries from each ancient sample (CTC and HXH) were  
1967 sequenced on two lanes of an Illumina HiSeq 2500 1TB at the New York Genome Center  
1968 (NYGC) using the High Output Run mode to produce 2x125 paired end reads ([Supplementary  
1969 Table 2](#)). For sample CTC, library 1.1 and an equimolar pool of libraries 2.1, 2.2 and 2.3  
1970 ([Supplementary Table 22](#)) were sequenced on one lane each. For sample HXH, an equimolar  
1971 pool of 19 PCRs from two libraries were sequenced on two lanes. Fastq files from individual  
1972 libraries were demultiplexed by the NYGC prior to delivery.

1973 We largely followed the ancient DNA pipeline of Kircher<sup>17</sup> to process our read data, though  
1974 slight modifications were made to scripts to accommodate our data. The first 50bp of each R1  
1975 read was trimmed using the `TrimFastQ.py` script. `TagDust`<sup>18</sup> was then used to identify  
1976 potential library artifact sequences based on known Illumina adaptor sequences. The thirty most  
1977 frequent artifacts for each sample were identified and a pairwise alignment was constructed for  
1978 each against the adaptor sequences. Pairwise alignments were then manually inspected for  
1979 evidence of sequence motifs that likely represent artifacts such as forward and reverse adaptors  
1980 containing no or very small inserts. This list of motifs was used as input for the  
1981 `MergeReadsFastQ_cc.py` script in order to merge paired-end reads with substantial  
1982 sequence overlap into single reads. Any remaining paired-end reads were discarded. Finally,  
1983 reads with at least 5 base calls with a Phred-scaled quality score of less than 15 were removed  
1984 using the `QualityFilterFastQ_gz.py` script.

1985  
1986 Reads were mapped to the CanFam3.1 reference genome using `BWA aln`<sup>12</sup> using the following  
1987 parameters: maximum edit distance=1%, number of gap opens=2, l=16500. Read groups were  
1988 added using the PICARD tool `AddOrReplaceReadGroups` and duplicate reads were  
1989 removed using `MarkDuplicates`. Finally, `Indels` were realigned using the GATK  
1990 `RealignerTargetCreator` and `IndelRealigner` tools<sup>19</sup> to produce a finished BAM  
1991 file for each sample.

1992  
1993 The proportion of reads mapping to the reference genome was >67% for both samples  
1994 ([Supplementary Table 2](#)), confirming high endogenous DNA content identified during screening.  
1995 `MapDamage`<sup>20</sup> analysis demonstrated that both samples possessed characteristics typical of  
1996 ancient DNA<sup>21</sup> such as high numbers of 5' C>T and 3' G>A changes at the end of fragments  
1997 ([Supplementary Figure 3](#)) (~35% and 28% of each transition category for HXH and CTC,  
1998 respectively), while fragment length was also small (mean 60-70bp). When examining a subset  
1999 of ~1 million random reads, only ~3% of reads mapped to the hg19 reference genome for both  
2000 samples, and almost all of these reads also mapped to CanFam3.1, which indicated very low  
2001 levels of human contamination in our data. Therefore, we conclude that both our samples appear  
2002 to contain substantial authentic canine ancient DNA. The mean coverage for both samples was  
2003 ~9x. Additionally, the mean coverage for the X and Y chromosomes was ~5x for both samples,  
2004 indicating they are males.  
2005

2006 Newgrange Dog

2007 As well as the two ancient samples generated in this study, we also reanalyzed the ancient Irish  
2008 Newgrange dog (henceforth known as NGD) described in Frantz *et al.*<sup>22</sup>. A BAM file containing  
2009 only single ended unique mapped reads was provided by the authors of that study. In order to  
2010 map to our modified version of CanFam3.1, reads were converted to fastq files using the  
2011 `bamtofastq` function in `Bedtools`. All subsequent processing, beginning with mapping  
2012 using `BWA aln`, were performed as described above for CTC and HXH. Mapping and post-  
2013 mortem damage characteristics of NGD are also described in [Supplementary Table 2](#).

2014

2015

2016

## 2017 **Supplementary Note 5: Genotype Calling for ancient samples**

2018  
2019 We utilized distinct schemes to ascertain variants depending on the analysis being conducted  
2020 ([Supplementary Note 6](#)). In all cases involving an ancient sample, we used a custom genotype  
2021 caller implemented in Python (code available at  
2022 [https://github.com/kveeramah/aDNA\\_GenoCaller](https://github.com/kveeramah/aDNA_GenoCaller)) that incorporates DNA damage patterns  
2023 estimated from MapDamage using the likelihood model described in <sup>15</sup>. Briefly, damage  
2024 patterns with respect to read position are fit with a Weibull distribution of the form  $a X \exp(-$   
2025  $(x^c) X b)$ , where  $x$  is the proportion of damaged C>T or G>A bases at a particular position  
2026 along the read (unlike <sup>15</sup>, we find a slightly better fit with a Weibull than when assuming  
2027 exponential decay) ([Supplementary Figure 31](#)). We then calculated the likelihood of each  
2028 possible diploid genotype using a model that incorporates the possibility of both sequencing  
2029 error and post-mortem damage (see Table S13 in <sup>15</sup> for the likelihood expression for each  
2030 possible allele, which can then be averaged for two alleles to obtain the likelihood for a  
2031 particular genotype).

2032  
2033 However, rather than simply reporting the best likelihood we also incorporated additional hard  
2034 filtering steps to produce final genotype calls. Firstly, any site with less than 7x coverage was  
2035 reported as missing. In addition, any position where the highest likelihood is a heterozygote must  
2036 have a minimum Phred-scaled genotype quality of 30 or the next highest homozygote likelihood  
2037 genotype was chosen instead. We found that this practice eliminated many false positives that  
2038 are the likely result of post-mortem damage, resulting in much more balanced numbers of C>T  
2039 vs T>C and G>A vs A>G heterozygous reference to alternate allele changes compared to when  
2040 using the standard GATK Unified Genotyper caller ([Supplementary Figure 4](#)) (however,  
2041 we note that when a site is already known to be segregating in other dogs or wolves, our  
2042 algorithm and GATK Unified Genotyper are almost completely concordant for sites with  
2043 >7x coverage). The balance was slightly improved for CTC compared to HXH, presumably as  
2044 post-mortem damage is less extensive for the former. Despite its high mean coverage, balance  
2045 was also noticeably improved for NGD. The transition/transversion ratio was only slightly less  
2046 than other modern canid samples for CTC and HXH, while NGD, concomitant with its increased  
2047 coverage, was clustered within the modern canid samples ([Supplementary Figure 32](#) and  
2048 [Supplementary Figure 33](#)) Base calls with a quality score less than 15 and reads with a mapping  
2049 quality less than 15 were not included during genotype calling. Base calls with a quality score  
2050 greater than 40 (which can occur during paired-end read merging) were adjusted to 40.

2051  
2052

2053

2054

## 2055 **Supplementary Note 6: Contemporary SNP set construction and** 2056 **filtration**

### 2057 Sample and data collection

2058 Variants from ninety-nine whole-genome canine sequences were analyzed in this study,  
2059 including the CTC, HXH and NGD ancient samples. Illumina TruSeq libraries from a Great  
2060 Dane and Iberian wolf were constructed from genomic DNA extracted from blood samples using  
2061 the Qiagen PureGene Blood kit. The genomes of a Portuguese village dog (PT49), a Chinese  
2062 Mongolian shepherd village dog (Dog05), and an Afghan hound (1756) were sequenced and  
2063 processed using the methods described in Auton *et al.* <sup>23</sup>. All remaining samples were acquired  
2064 from previously published datasets deposited on the NCBI sequence read archive (SRA)  
2065 database ([Supplementary Table 4](#); <sup>23-27</sup>). This includes a subset of read data from samples  
2066 described in Decker *et al.* <sup>28</sup>. Variant call format files (VCF) for six samples from the Freedman  
2067 *et al.* <sup>25</sup> study (basenji, dingo, golden jackal, Croatian wolf, Israeli wolf, and Chinese wolf) were  
2068 acquired from John Novembre's group. Further processing for each canine is detailed below.

### 2069 Variant calling and filtration

2070 All dog genome sequence data was aligned against a modified version of CanFam3.1 reference  
2071 genome with unplaced contig sequences combined into a single chromosome sequence  
2072 (separated by 200 'N' characters) and including a representation of the non-pseudo autosomal Y  
2073 chromosome sequence <sup>29</sup> using BWA <sup>12</sup>. PCR duplicates were removed by Picard v1.62  
2074 (<http://broadinstitute.github.io/picard>), reads in regions with candidate indels were locally  
2075 realigned and base quality scores were recalibrated using GATK v3.4 <sup>19</sup>, resulting in a dataset  
2076 that exhibited mean autosomal coverages of 5.53-44.74x. We generated GVCF files (Genomic  
2077 VCF) with a record for every position in the genome using GATK HaplotypeCaller (GATK  
2078 v3.4) <sup>19</sup>.

2079  
2080 We generated three different call sets with different ascertainment schemes. The variant calling  
2081 process for each call set is detailed below:

#### 2082 Call set 1-Comprehensive variants

2083 This call set aims to include all variants from the 89 genomes (with bam files), 3 ancient  
2084 genomes (with bam files) and Freedman's 6 genomes (with vcf files from Freedman). We first  
2085 generated call sets from the three groups separately, took the union of the call sets, genotyped all  
2086 the variants in each group, and then applied filtering accordingly.

2087  
2088 1) We applied the GATK HaplotypeCaller to call variants (SNPs and indels) from the  
2089 89 genomes for which we had BAM files together. We applied a hard filter to remove  
2090 sites that are within 5bp of an indel, and with MQ<25, QD<10, qual<33, mean DP <  
2091 mean\_read\_depth/2, or mean DP> mean\_read\_depth x 2. The mean read depth for 89  
2092 genomes together is 879X. This set of variants contained 18.7 M SNPs. For the three  
2093 ancient genomes, we applied the ancient DNA caller to discover variants in each ancient  
2094 sample, using DP7, MQ15, BQ15, GQ30 as cut-off as described in Supplementary  
2095 Methods 5. The variants from each ancient genome were merged, resulting in 5.8M

2096 SNPs. For Freedman's genomes, we took variants from the vcf files from Freedman *et al.*  
2097 2) We took the union of these call sets and genotyped each variant in each group. For the 89  
2098 genomes, we genotyped those variants from 89 genomes together and applied a hard filter  
2099 to remove sites with  $\text{mean DP} < \text{mean\_read\_depth}/2$ ,  $\text{mean DP} > \text{mean\_read\_depth} \times 2$ , or  
2100  $\text{MQ} < 25$ . For the ancient genomes, we used the ancient DNA caller to genotype each  
2101 variant, using DP7, MQ15, BQ15 as a cut-off. For Freedman's samples, we directly  
2102 obtained genotype calls from Freedman's emit-all vcf files. The comprehensive SNP call  
2103 set contains 24M SNPs. We additionally genotyped these SNPs in the Andean fox.  
2104 3) After removing sites with at least one missing genotype, we ended up with a final set of  
2105 7.4M SNPs.

#### 2106 Call set 2-Ascertained in ancient genomes

2107 This call set only includes sites discovered in the three ancient genomes.

2108 1) We applied the ancient DNA caller to discover variants in each ancient genome, using  
2109 DP7, MQ15, BQ15, GQ30 as cut-off as described in Supplementary Note 5. The variants  
2110 from each ancient genome were merged, resulting in 5.8M SNPs.  
2111 2) We applied the GATK UnifiedGenotyper to genotype these variants in other  
2112 contemporary dog genomes and applied the aDNA caller to genotype those variants using  
2113 DP7, MQ15, BQ15 as cut-off in each ancient genome. We directly obtained genotype  
2114 calls from Freedman's emit-all VCF files. We additionally genotyped these SNPs in the  
2115 Andean fox.  
2116 3) After merging VCF files and restricting to no missing genotypes, we ended up with a  
2117 final set of 1.9M SNPs

#### 2118 Call set 3-Ascertained in New World wolves

2119 This call set is designed to include only sites that are variables in New World wolves, a group  
2120 that is sister to Old World wolves and dogs. Fan *et al.*<sup>27</sup> have demonstrated that the New World  
2121 wolves have the least amount of admixture with dogs. D-statistics using golden jackal as the  
2122 outgroup show no significant admixture between dogs and either of the New World wolves. We  
2123 note that G-PhoCS analysis found 1.2%-3.2% gene flow from the basenji into the Mexican wolf  
2124 population.

2125 1) We chose three New World wolves (glw, ysa, mxa), each with ~20X coverage. We  
2126 applied HaplotypeCaller implemented in GATK to call variants (SNPs and indels)  
2127 from the three genomes together and applied a hard filter to remove sites that are within  
2128 5bp of indel,  $\text{MQ} < 25$ ,  $\text{QD} < 10$ ,  $\text{qual} < 33$ ,  $\text{mean DP} < \text{mean\_read\_depth}/2$ , or  $\text{mean DP} >$   
2129  $\text{mean\_read\_depth} \times 2$ . The mean read depth for the three genomes together is 76X. We  
2130 additionally only keep variants with an alternative allele count of 1-5, resulting in 8.4M  
2131 SNPs.  
2132 2) We applied GATK UnifiedGenotyper to genotype those variants in other  
2133 contemporary dog genomes and applied the aDNA caller using DP7, MQ15, BQ15 as  
2134 cut-offs to genotype those variants in each ancient genome. We directly obtained  
2135 genotype calls from Freedman's emit-all vcf files and only retained variants that passed  
2136 Freedman's Genome Filter (repeat divergence greater than or equal to 25, no CNV, MA,  
2137 CpG). We additionally genotyped those SNPs in the Andean fox.  
2138 3) After merging VCF files and restricting to no missing genotypes, we ended up with 1.8M  
2139 SNPs.

2140 4) Ignoring the impact of recurrent mutation and post-divergence gene flow, this call set  
2141 includes only mutations that either are private to New World wolves or occurred in the  
2142 ancestral population of New World wolves, Old World wolves and dogs and thus have an  
2143 essentially unbiased ascertainment with respect to Eurasian dog and wolf populations.  
2144

2145 We performed Principal Component Analysis (PCA) on the three call sets to explore how the  
2146 potential biases in each might affect the genetic differentiation observed in our data  
2147 (Supplementary Methods 8). When we include all canids, we observe that in call sets 2 and 3  
2148 genetic differentiation across dogs is reflected in PC2, whereas all dogs cluster together in that  
2149 PC in call set 1 (Supplementary Figures 36-38). However, when we only include dogs and  
2150 remove groups used for ascertainment, the three call sets are consistent with the pattern observed  
2151 in a PCA performed using the SNP array data, suggesting that the patterns of genetic  
2152 differentiation amongst samples are robust across the different ascertainment schemes.  
2153 Additionally, we explored the effect that potentially damaged bases (C > T and G > A  
2154 transitions) could have in downstream analyses by performing a PCA on the SNP array dataset  
2155 (Supplementary Figure 34) including our ancient samples with and without transitions. We found  
2156 that the relative position of the three ancient samples was essentially unaffected, further  
2157 validating our ancient DNA calling method for known SNP positions. Therefore, transitions were  
2158 included in all subsequent SNP-based analyses. Although PCA reveals that the three call sets  
2159 broadly capture the same variation patterns, we cannot control bias related to differences in  
2160 coverage from call set 1 (which includes higher-coverage breed dogs) and cannot reliably  
2161 identify false variation in call set 2 as a consequence of post-mortem damage. We therefore  
2162 utilize call set 3, with variants ascertained in New World wolves, as the primary call set for most  
2163 subsequent analyses. While gene flow between New World wolves and Old World canids could  
2164 potentially bias the observed genetic variation in this call set, previous genomic studies have  
2165 reported very low to negligible migration rates only between Mexican wolves and basenji/dingo  
2166 <sup>27</sup>, and another study suggests a potential old introgression from dogs to North American wolves  
2167 (though we note that selection on standing variation cannot be ruled out) <sup>30</sup>. In both cases, these  
2168 admixture events should have minimal impact on our analyses that primarily involve Eurasian  
2169 dogs.

## 2170 SNP array data collection and processing

2171 Canine SNP array datasets were obtained from Dryad from <sup>31</sup> (doi:10.5061/dryad.v9t5h) and <sup>32</sup>  
2172 (doi:10.5061/dryad.078nc). Sample information and the short-codes are summarized in  
2173 Supplementary Table 3. We used GATK GenotypeCaller (GATK v3.4; <sup>19</sup>) to obtain  
2174 genotype calls of SNP array loci from the whole genome vcf files (see methods above). For  
2175 genomes from Freedman *et al.* <sup>25</sup> genotype calls were obtained directly from emit-all vcf files.  
2176 We only included calls that passed sample filters (GQ greater than 20, DP less than 2\*genome-  
2177 wide depth, DL=0, and DV greater than 5). Ancient DNA genotyping was performed as  
2178 described in Supplementary Note 5. After removing sites with more than 5% missing data across  
2179 individuals our final SNP array dataset consisted of genotypes at 128,743 autosomal SNPs.

## 2180 **Supplementary Note 7: Mitochondrial Analysis**

### 2181 Mitochondrial haplogroup assignment

2182 To infer the mitochondrial haplogroup placement of the HXH and CTC samples, we aligned  
2183 their mitochondrial sequences to samples from the canid alignment released by<sup>33</sup> and NGD. The  
2184 Thalmann *et al.*<sup>33</sup> canid alignment includes a comprehensive panel of modern dogs across four  
2185 major clades (A-D), modern wolves, coyote, and both ancient wolf-like and dog-like  
2186 mitochondrial sequences.

2187  
2188 As expected, the sequencing depth of the mtDNA was high: the average sequencing depth was  
2189 179x and 208x in CTC and HXH samples, respectively. For the present analysis, we aligned the  
2190 reconstructed HXH and CTC mitochondria sequences to the ancient canids (retaining samples  
2191 with > 16kb callable sequence), modern dogs from the Thalmann *et al.*<sup>33</sup> alignment (90 samples)  
2192 and NGD ancient dog, constructed a phylogenetic tree and identified which of the four major  
2193 mitochondrial clades the two ancient German samples belong. For measurements of nucleotide  
2194 diversity and phylogenetic reconstruction, we only used positions where genotypes were called  
2195 across all samples. After removing missing sites, our mtDNA alignment consisted of 14,936  
2196 nucleotide positions and 616 variant sites. MEGA 6.06 was then used to conduct a phylogenetic  
2197 analysis<sup>34</sup>. A comprehensive pairwise comparison of nucleotide differences across the dataset  
2198 showed that HXH and CTC mitochondrial sequences are more similar to each other (n = 5  
2199 differences) than to any other ancient canid or modern dog. Given the geographic proximity of  
2200 the excavation sites of the HXH and CTC, a strong relationship between the mitochondrial  
2201 haplotypes is not surprising. Furthermore, the low count of pairwise differences between the  
2202 HXH and CTC suggests that random ancient artifacts are not a significant contribution to our call  
2203 set of mitochondrial variants. HXH and CTC show higher sequence identities to NGD ancient  
2204 dog than to any Thalmann sample: HXH has a slightly higher identity to NGD (n = 13  
2205 substitutions) than the CTC dog (n = 18 substitutions). Interestingly, the most similar haplogroup  
2206 in the Thalmann *et al.*<sup>33</sup> dataset was the ancient dog-like sample from Germany (Germany 12.5  
2207 kya), which differed from the HXH and CTC dogs by 17 and 22 sites, respectively. A NJ tree  
2208 built with a TN93 substitution model (500 bootstraps) of our alignment revealed that CTC and  
2209 HXH mtDNA haplotypes are members of the C clade of modern dogs (100% support)  
2210 ([Supplementary Figure 5](#)).

2211  
2212 Once we characterized the HXH and CTC dogs as members of clade C, we sought to identify  
2213 more granular haplogroup information as clade C branches into the C1 and C2 haplogroups. We  
2214 downloaded 24 C1 and C2 mitochondria samples from GenBank with haplogroups annotated by  
2215 Duleba *et al.*<sup>35</sup> and included them in our alignment (EU789659, EU789760, EU789661,  
2216 KM061561, EU408267, KM061540, KM061534, DQ480489, KM061534, KM061535,  
2217 EU789764, EU789762, KM061533, KM061497, KM061488, KM061481, KM061475,  
2218 KM061591, KJ637139, KJ637136, EU789753, EU789751, EU789750, and EU789657)  
2219 ([Supplementary Figure 8](#)).

2220  
2221 We performed an additional analysis including the low coverage (8,667 retained nucleotides)  
2222 Bonn Oberkassel ancient sample (Germany 14,700) from the Thalmann dataset. Relative to the  
2223 alignments used to generate [Supplementary Figure 5](#) and [Supplementary Figure 8](#), this alignment



2224 is significantly diminished in nucleotide positions (n=8,090) and variant sites (n=369). Our NJ  
2225 tree of this alignment shows the Blue Heeler as an outgroup of the C clade and an unexpectedly  
2226 long branch length of the Bonn Oberkassel dog, which may be the result of a reduction in  
2227 mitochondrial diversity in this dataset and DNA damage of the Bonn Oberkassel dog,  
2228 respectively ([Supplementary Figure 6](#)). We performed a transversion-only analysis of this  
2229 alignment ([Supplementary Figure 7](#)). However, by reducing diversity of the dataset we no longer  
2230 find bootstrap support for our clades of interest. Given the unexpected topological changes and  
2231 additional diversity attributed to DNA damage of the Bonn Oberkassel dog, we interpret the high  
2232 coverage only alignment as a more accurate estimate the true mitochondrial tree.  
2233  
2234

2235

2236

## 2237 **Supplementary Note 8: Neighbor-joining tree estimation**

2238  
2239 We computed a matrix of pairwise genetic distances between each canid in our autosomal whole  
2240 genome SNP set ascertained in the New World wolves (Call set 3) and built a NJ tree using the  
2241 Andean fox as an outgroup. The genetic distance  $d(X,Y)$  between diploid genomes is calculated  
2242 using the formula in <sup>36</sup>. A hundred bootstrap replicates were generated by dividing the genome  
2243 into 5 cM windows and sampling with replacement from those windows. We used the R package  
2244 ape to generate the NJ tree and used nw\_support from the newick\_utils package <sup>37</sup> to  
2245 compute bootstrap support.

2246  
2247 We found that all coyotes were clustered into a single clade, sister to all gray wolves and dogs  
2248 ([Supplementary Figure 9](#)). All New World wolves (Mexican, Great Lakes, and Yellowstone  
2249 wolves) first branched out, separated from the rest. Since we are using SNPs ascertained in the  
2250 New World wolves (Call set 3), we are missing sites that are non-variable in the New World  
2251 wolves, which likely explains the reason why the New World wolves do not form a single clade.  
2252 Dogs were sister to the Old World wolves, consistent with previous findings <sup>27</sup>. Within the dog  
2253 phylogeny, the first branch with 100% bootstrap support contained village dogs from South  
2254 China, Vietnam, Borneo and breeds that originated from those areas (chow chow and shar-pei  
2255 from China, dingo originated from East Asia before later being brought to Australia), consistent  
2256 with a recent finding that dogs from southeast Asia are one of the basal group <sup>38</sup>. Sister to the  
2257 group with mostly southeast Asian dogs, are the rest of the village and breed dogs that have a  
2258 tree structure only with high inner branch support: Sub-Saharan village dogs with the basenji,  
2259 Indian village dogs, European village dogs with most modern breed dogs, and the three ancient  
2260 samples (CTC, HXH and NGD) each form distinct clades.

2261  
2262 We further removed most breed dogs, North China village dogs (found to be admixed with  
2263 European dogs, see Supplemental Note 10) and Papua New Guinea village dogs from further  
2264 analysis. The remaining village dogs and ancient breeds were then used to generate a second NJ  
2265 tree ([Supplementary Figure 10](#)). We found much higher bootstrap support with respect to village  
2266 dogs with this tree. Sister to the group with mostly southeast Asian dogs, there are three major  
2267 clades, a clade containing Indian village dogs branched out first, then two sister clades, one  
2268 containing Sub-Saharan, Egypt and Qatar village dogs and the other containing ancient dogs,  
2269 European breeds, Portuguese and Lebanon village dogs. Among the third clade, CTC branches  
2270 out first, followed by NGD and HXH, which forms a clade and sister to other European breeds  
2271 and Portuguese, Lebanon village dogs.

2272

2273

2274

## 2275 **Supplementary Note 9: Population structure analyses**

### 2276 Principal component analysis

#### 2277 *SNP array-based PCA*

2278 Principal component analysis (PCA) for both the SNP array and genome sequenced SNP datasets  
2279 were run using `smartpca`, part of the `EIGENSOFT` package version 3.0<sup>39</sup>. Previously  
2280 published samples consisting of 783 globally distributed village/free-breeding dogs, 196 dogs  
2281 from 164 different breeds and NGD<sup>31,32</sup> were examined in the SNP array-based PCA in addition  
2282 to our two German ancient samples (CTC and HXH). Diploid and pseudo-haploid PCAs were  
2283 generated using this data set where: i) the PC space was defined by the village/free-breeding  
2284 dogs and the breed dogs and ancient samples were projected onto the PC space, and ii) the PC  
2285 space was defined by all samples. The pseudo-haploid ped file was generated with a custom  
2286 script that randomly chooses one allele at each site. In addition, we generated a pseudo-haploid  
2287 PCA where sites potentially subject to post-mortem damage (C <> T, G <> A) were removed,  
2288 resulting in 22,699 filtered SNPs.

2289  
2290 We observed little difference between the diploid and pseudo-haploid PCAs, with and without  
2291 projection, and removing potentially damaged sites ([Supplementary Figure 34-35](#)).  
2292 Subsequently, we generated a diploid PCA defining the PC space on village dogs and did not  
2293 remove the potentially damaged bases as it appears that our ancient genotype calling largely  
2294 accounts for post-mortem DNA damage as predicted. To ensure covariance amongst dogs of  
2295 European ancestry did not dominate the first few components of the PCA, European breed dogs  
2296 and village dogs of the Americas (both of which possess large amounts of European ancestry)  
2297 were removed from the PCA.

#### 2298 2299 *Genome sequence-based PCA*

2300 PCA was performed on the genome sequence SNP data for all three call sets (see Supplementary  
2301 Note 6.2). Since the SNP array PCAs showed little difference between diploid, pseudo-haploid,  
2302 and removing potential damaged bases, we generated only diploid PCAs for the genome  
2303 sequence sets, defining the PC space on all samples. For call sets 1 and 2, we generated PCAs  
2304 with all samples (n = 99); these sets of PCAs include 3 coyotes, 1 golden jackal, 1 fox, 14  
2305 geographically distributed gray wolves, 45 geographically distributed village dogs, 32 dogs from  
2306 28 distinct breeds, and the three ancient samples (CTC, HXH and NGD). We applied “--bp-space  
2307 5000” filter to thin SNPs; this resulted in 376,777 sites for Call set 1 and 306,319 sites for Call  
2308 set 2. For Call set 3, we generated a PCA with the same set of individuals but excluded the New  
2309 World wolves (n = 94); these wolves were excluded because a subset of the New World wolves  
2310 were used to ascertain the SNPs in Call set 3. We applied a minor allele frequency filter (“--maf  
2311 0.05”) in order to retain SNPs segregating in the current set and a “--bp-space 5000” filter, which  
2312 resulted in 261,081 sites. For all three call sets, we additionally performed analyses that excluded  
2313 the coyotes, jackal, fox, gray wolves, and outlier dogs (basenji, dingo and a Sub-Saharan village  
2314 dog, 1756); we applied “--bp-space 5000” and “--maf 0.05” filters to each set which resulted in  
2315 300,864 sites for Call set 1, 290,917 sites for Call set 2, and 245,363 sites for Call set 3. All site  
2316 filtering for PCA was done using `PLINK v1.90`<sup>40</sup>.

2317  
2318 In the PCA of Call set 1 with all individuals, PC 1 distinguishes coyotes, jackal, and fox from the

2319 other samples, while PC 2 separates the wolves from the dogs. Interestingly, little variation is  
2320 seen in the dog grouping which forms a tight cluster and includes CTC, HXH, and NGD  
2321 ([Supplementary Figure 36](#)). However for Call set 2 and 3, PC 1 separates the wolves, coyotes,  
2322 jackal, and fox from dogs and PC 2 explains variation among the dog samples ([Supplementary](#)  
2323 [Figure 37, 38](#)). Additional PCs reveal variation among the outgroup and wolf samples. Overall, it  
2324 is evident that CTC and HXH are dogs, and are not similar to modern wild canids.

2325  
2326 When we remove the outliers and outgroups used for ascertainment, PC 1 and PC 2 are similar to  
2327 the SNP array PCA, with modern breed dogs generally clustering together, village dogs  
2328 distributing following geographic patterns, and “ancient”/“basal” breed dogs (ie. Siberian Husky,  
2329 Saluki, etc.), situating away from the modern breed dogs and grouping near the village dogs  
2330 matching their geographical origins ([Supplementary Figure 39](#)). Also, like the SNP array  
2331 analysis, CTC falls along the Indian axis and HXH and NGD fall nearest the European core but  
2332 along the Southeast Asian axis. This general pattern is seen across all SNP call sets  
2333 ([Supplementary Figure 40-41](#)).

## 2334 SpaceMix

2335 Spacemix is a relatively new method<sup>41</sup> that models allele frequency covariance amongst  
2336 populations to create a “geogenetic map”. The method provides a similar description of  
2337 isolation-by-distance-based population structure as PCA but also has the added advantage of  
2338 visualizing major deviations of increased covariance that are likely to reflect long-distance  
2339 admixture events. As this analysis will have most power with large numbers of populations, we  
2340 performed this analysis on the three ancient genomes, Old World village dog populations and  
2341 Old World wolves from the SNP array data set. In addition, this method requires independent  
2342 SNPs and relatively even sample sizes from each population. Therefore, the data was filtered by  
2343 choosing SNPs randomly such that the minimum distance between any pair was 100Kb, and the  
2344 number of individuals in each population was limited to five (for populations with more, five  
2345 were randomly chosen). This resulted in a dataset containing 19,021 SNPs in 51 populations.

2346  
2347 SpaceMix requires fitting a complex parameter space and thus utilizes an Markov Chain Monte  
2348 Carlo (MCMC) search to find the most likely model parameters and also estimate confidence  
2349 intervals. We ran 10 initial burn-ins of 100,000 generations to identify the best starting position  
2350 for the MCMC chain, followed by a single long run for 10,000,000 generations, which appeared  
2351 to be sufficient for the chain to stabilize, sampling every 1,000 generations. We performed eight  
2352 separate iterations of this process and present results from the run with the highest peak  
2353 probability. The model appeared to largely fit the major features of the data for this run  
2354 ([Supplementary Figure 42](#)). Latitude and Longitude coordinates for each population’s country of  
2355 origin was also provided to inform priors for the fitting of geogenetic space.

2356  
2357 A plot of populations in geogenetic space separates wolves and dogs as expected ([Supplementary](#)  
2358 [Figure 21](#)). In addition the clustering of dogs essentially replicates the results from the PCA for  
2359 individual samples, with HXH found close to NGD and CTC located closest to Afghanistan  
2360 village dogs. Though the authors of SpaceMix note that it has a tendency to underestimate  
2361 admixture proportions, the software inferred that 25 populations had admixture from an outside  
2362 source greater than 5%. Visualizations of all inferred admixture events inferred to be greater than  
2363 5% are given in [Supplementary Figure 44](#) but will not be discussed at length here as many are

2364 replicated from the NGSadmixture and  $f_3$  analysis. For example, the highest admixture component  
2365 was observed for free roaming Chinese dogs (pCH), which also had the most negative  $f_3$  statistic.  
2366 The figure for this population shows pCH drawing ancestry from a population extending through  
2367 Europe (Supplementary Figure 44r) (SpaceMix appears to overshoot potential source populations  
2368 on occasion).

2369  
2370 Perhaps most strikingly, while HXH and NGD showed no particular evidence of strong  
2371 admixture, SpaceMix inferred a strong admixture source component (~10%) for CTC from the  
2372 Old World wolf geogenetic space (Supplementary Figure 22). Given CTC is represented by only  
2373 a single sample and thus allele frequencies for its underlying population can only be crudely  
2374 estimated, this suggests a fairly strong wolf component. A similar but less strong inference is  
2375 made for village dogs from Egypt (Egy, 4%), Iran (pIR, 4%) and Saudi Arabian (pSA, 6%).  
2376 Interestingly SpaceMix infers that the Israeli wolf draws approximately 10% of its ancestry from  
2377 this same dog geogenetic space (i.e. in the opposite direction) (Supplementary Figure 43).  
2378 Amongst the other wolves the Iranian and Indian wolves do not appear to draw substantial  
2379 ancestry from dogs, while the European (~7%) and Chinese (1%) wolves are inferred to possess  
2380 dog ancestry compatible with their geographic location (though Asian dogs were found closer to  
2381 the general wolf cluster in geogenetic space, which may reduce the inferred admixture proportion  
2382 for Chinese wolves).

### 2383 SNP array-based ADMIXTURE

2384 ADMIXTURE (v.1.22)<sup>42</sup> was run on a subset of individuals ( $n = 108$ ) from the SNP array data  
2385 set; this included our two ancient German samples, NGD and a global representation of village  
2386 dogs. We generated three replicates, with different seeds, and plotted the run with the overall  
2387 lowest cross validation error across all  $K$  (number of defined clusters) values. The cross  
2388 validation procedure was also used to determine that three ancestral populations ( $K = 3$ ) was the  
2389 best value for  $K$  (Supplementary Figure 45).

2390  
2391 At  $K = 2$ , Southeast Asian village dogs separate from the rest of the village dogs; this ancestry is  
2392 seen in most of the other village dogs and westwardly decreases in percentage among the  
2393 samples. CTC, HXH, and NGD have a moderate amount of Southeast Asian ancestry, 23%,  
2394 17%, and 12% respectively. At  $K = 3$ , in addition to the Southeast Asian grouping (red), Indian  
2395 (blue) and European (green) ancestries emerge (Supplementary Figure 15). And at  $K = 4$ , African  
2396 ancestry appears. Interestingly, CTC harbors Indian and African ancestry (27% and 8%), while  
2397 HXH and NGD do not. Finally, at  $K = 5$ , Europe additionally divides into two groups. Overall,  
2398 the results of this analysis are consistent with results of the other population structure analyses;  
2399 both CTC, HXH and NGD contain a moderate amount of Southeast Asian ancestry, while only  
2400 CTC contains Indian and perhaps a small amount of African ancestry.

### 2401 NGSadmixture

2402 As many of our genomes are medium to low coverage, including our two ancient samples, we  
2403 used NGSadmixture<sup>43</sup> to infer population ancestry for each genome given pre-specified numbers  
2404 ( $K$ ) of clusters. While similar in spirit to Admixture<sup>42</sup>, NGSadmixture accounts for genotype  
2405 uncertainty by integrating over all three possible genotypes for a site that is known to be  
2406 biallelic. We extracted genotype likelihoods for our genome data for all village dogs, Old World

2407 wolves and the three ancient samples at SNPs that were separated by at least 10,000bp (179,072  
2408 SNPs) and ran `NGSadmix` under default parameters (changing these had little effect) for  $K=2$ -  
2409 10 (for the purposes of brevity only results for  $K=2-6$  are presented here). We performed  
2410 multiple runs for each  $K$  and found them to be highly consistent.

2411  
2412 Unsurprisingly, for  $K=2$  wolves separate from dogs, though some dogs, including CTC along  
2413 with African, Middle Eastern and Indian village dogs, demonstrate small amounts of putative  
2414 wolf ancestry (some wolves also demonstrate dog ancestry) ([Supplementary Figure 16](#)). At  $K=3$   
2415 dogs separate into two primary clusters, one containing southeast Asian dogs from Vietnam,  
2416 Borneo and some southern Chinese dogs. Other dogs are either assigned exclusively to the other  
2417 cluster or are mixed. As in the `ADMIXTURE` analysis of the SNP array data CTC, HXH and  
2418 NGD all demonstrate a small east Asian component unlike modern European dogs. This is  
2419 compatible with HXH and NGD's position in the PCA. The Chinese wolf appears to possess  
2420 substantial Southeast Asian dog ancestry, consistent with local dog/wolf gene flow. For  $K=4$ , the  
2421 non-southeast Asian cluster is further subdivided into two clusters, with Europeans and Lebanese  
2422 orientating one cluster, and Indian and African dogs orientating the other. Noticeably, CTC,  
2423 unlike HXH and NGD, draws a significant amount of ancestry from the Indian/African cluster,  
2424 which again would be consistent with this sample's PCA position intermediate of European,  
2425 Indian and East Asian village dogs and the `ADMIXTURE` analysis. Subsequent  $K$  values begin  
2426 distinguishing specific village dog populations.

2427  
2428

2429

2430

## 2431 **Supplementary Note 10: *f*-statistics and *D*-statistics analysis**

2432  
2433 Patterson *et al.*<sup>44</sup> have developed a general approach for examining allele frequency correlations  
2434 amongst populations to make powerful inferences about population histories that involve  
2435 admixture. This approach involves estimating *f*-statistics and *D*-statistics within the context of  
2436 certain theoretical expectations given a particular demographic scenario. The major advantage of  
2437 these methods is that inferences can be made with even low coverage single genomes (<1x) and  
2438 that inferences are relatively robust to ascertainment biases. Therefore we implemented these  
2439 methods to better understand the history of our ancient genomes. Genetic map positions for each  
2440 SNP used in these analyses were inferred from Auton *et al.*<sup>23</sup>.

### 2441 Outgroup *f*<sub>3</sub> analysis

2442 We estimated the relative genetic similarity of the three ancient dogs to each other and various  
2443 modern dog and wolf populations by calculating an outgroup *f*<sub>3</sub>-statistic<sup>44</sup> of the form F3 (C : A,  
2444 B). We set either CTC, HXH or NGD as population B and applied this test to both the SNP array  
2445 data (with the golden jackal set as an outgroup and population A set as a Old World village dog  
2446 or Wolf population, with individuals from the same population merged) and the genome data  
2447 (Call set 3 with Andean fox set as an outgroup and population A set as individual Village dog  
2448 samples, plus the basenji and dingo). *f*<sub>3</sub> statistics were estimated using the qp3pop program  
2449 (modified to allow more than 22 autosomes) found within the Admixtools software package.  
2450 Standard errors were estimated using a weighted block jackknife as previously described in  
2451 Patterson *et al.*<sup>44</sup>.

2452  
2453 Results using both datasets are highly consistent. When set as the target B both HXH and NGD  
2454 show greatest similarity to each other followed by modern European village dogs, and are most  
2455 distant to East Asian and Indian village dogs. CTC shows a similar level of similarity to HXH  
2456 and NGD as other modern Central Asian and Middle Eastern village dogs (Figure 2,  
2457 Supplementary Figure 13A,C, Supplementary Figure 14A,C). However, when CTC is set as  
2458 population B, it shares the most similarity with HXH, then NGD and then European dogs (Figure  
2459 2, Supplementary Figure 13B, Supplementary Figure 14B). This may suggest some continuity  
2460 leading from HXH to CTC for their European component (tested formally below).

### 2461 MixMapper

2462 MixMapper<sup>45</sup> provides a method for inferring admixture events within the context of a  
2463 population tree based on *f*-statistics. The approach is similar in principle to TreeMix in that a  
2464 bifurcating tree is first fit to allele frequency correlations and migration is then inferred on top of  
2465 the tree if it improves the fit of the data. However the MixMapper approach is less automated  
2466 than TreeMix and is considered a bottom-up approach, allowing more control and reliability in  
2467 testing specific hypotheses with regard to admixture events between two or three populations.  
2468

2469 We applied the MixMapper approach to both the SNP array data and genome SNP data (Call  
2470 set 3). First, we used the *f*<sub>3</sub> statistic to determine which populations were likely to be admixed.  
2471 Again, this test statistic is of the form F3 (C : A, B). However, when C is not chosen specifically  
2472 to be an outgroup, any phylogeny where population C is admixed between two populations

2473 descended from A and B will have some portion where allele frequencies are negatively  
2474 correlated, which can result in negative  $f_3$  values. Z-scores for significant negative  $f_3$  statistics  
2475 were again calculated using a weighted block jackknife. All combinations of three way  
2476 phylogenies were examined for the three ancient dogs, Old World modern village and free-  
2477 breeding dogs, dingo, basenji, wolves (Old and New World), coyotes, golden jackal and Andean  
2478 fox, with individuals grouped by population. Using SNP array data 30 non-New World canid  
2479 populations had significantly negative (Z-score <-2),  $f_3$  statistics ([Supplementary Table 5](#)), while  
2480 for the whole genome data 12 populations were putatively admixed ([Supplementary Table 6](#)).  
2481 These populations did not include CTC, HXH or NGD, but the  $f_3$  test has low power when the  
2482 target consists of only a single diploid individual.

2483  
2484  $f_2$  statistics were then used to construct scaffold NJ trees for the remaining non-admixed  
2485 populations (for genome data we also excluded the three ancient genomes and modern dog  
2486 populations represented by only a single genome, basenji, dingo, Mongolian shepherd and the  
2487 China-Kazakhstan dog). These trees consisted of 25 ([Supplementary Figure 17](#)) and 10  
2488 ([Supplementary Figure 18](#)) populations for the SNP array and genome data respectively (CTC,  
2489 HXH and NGD were not included in these trees). We note that the topology of these trees are  
2490 consistent with those constructed in [Supplementary Note 8](#).

2491  
2492 Two-way admixture fitting was then performed for CTC, HXH, and NGD separately. This  
2493 involves testing every pair of branches in the scaffold as potential source populations for a third  
2494 target population by solving a system of  $f_2$ -based equations, and choosing the pair with the  
2495 smallest residual norm value. Significance was assessed via bootstrapping by dividing the  
2496 genome into 50 even sized blocks of SNPs, resampling with replacement 500 times and  
2497 recalculating the test statistics.

2498  
2499 For both SNP and genome data `MixMapper` identified a potential admixture event for both  
2500 HXH and NGD involving ~80% ancestry from one source population leading to modern  
2501 Europeans and another source leading to a modern East Asian populations, consistent with the  
2502 ADMIXTURE/NGSadmix analysis ([Supplementary Table 7-8](#)). Some dog-wolf admixture was  
2503 observed for both samples using the SNP data, but was not replicated with the genome data.  
2504 However multiple potential admixture events were identified for CTC involving branches  
2505 leading to modern European, Indian, East Asian, Middle Eastern and wolf populations  
2506 ([Supplementary Table 9](#)).

2507  
2508 Given the  $f_3$ -outgroup test showed that HXH demonstrated the greatest similarity to CTC when  
2509 the latter was the target, we also attempted to fit a three-way admixture event with HXH being an  
2510 initial admixed population (between the European and East Asian populations shown in  
2511 [Supplementary Table 7](#), and CTC being a descendent of HXH as well as being admixed with an  
2512 additional third population. For both SNP array and genome data `MixMapper` found the greatest  
2513 support for a three-way admixture event for CTC involving HXH and a population leading to  
2514 modern Indian or Saudi Arabian village dogs as well as Israeli wolves, similar to the pattern  
2515 identified in the ADMIXTURE and NGSadmix analysis ([Supplementary Table 11](#)).

2516  
2517 Thus our results suggest that CTC represents an admixed lineage that is directly descended from  
2518 HXH, which itself is admixed and may represent an ancient branching from the modern



2519 European lineage.

2520  
2521 PCA of the SNP array data demonstrates that CTC occupies a similar space to Afghanistan (Afg)  
2522 village dogs for the first two PCs. [Supplementary Table 5](#) shows that Afg village dogs appear to  
2523 be the result of an admixture event, and while many pairs of test source populations can generate  
2524 negative  $f_3$  values, the most significant was when utilizing pPO and I-W (i.e. a European and an  
2525 Indian population). Negative  $f_3$  values are also generated when utilizing pPO (and other  
2526 European populations) and Viet. Thus Afg shows many of the same admixture signals as CTC.  
2527 We hypothesized that admixture events seen in Afg village dogs may have the same origins as  
2528 those in CTC, which itself is potentially descended from HXH. Therefore we included HXH as  
2529 part of the scaffold NJ tree and allowed MixMapper to model a two-way admixture event for  
2530 both CTC and Afg village dogs. Every putative pair of sources inferred for CTC involve HXH  
2531 and no modern European village dogs ([Supplementary Table 13](#)). However, the fitted pairs for  
2532 Afg not only include HXH but also Bosnian (Bos) and Portuguese (Por) village dogs. Thus it is  
2533 seems likely that there has been additional European admixture in Afghanistan village dogs that  
2534 are distinct from that seen in the CTC dog.

2535 D-statistics to examine wolf admixture

2536 Fan *et al.*<sup>27</sup> has recently demonstrated that many wolves from across the world contain  
2537 substantial ancestry derived from dogs, including some of the dogs used in this study (for  
2538 example >20% dog ancestry in the Israeli and Iberian wolf). We calculated D-statistics of the  
2539 form  $D(A,B,Wolf,Outgroup)$  using the `qpDstat` function in `AdmixTools` to examine  
2540 potential differences in dog-wolf admixture between the three ancient dogs. Because of the  
2541 potential effects of ascertainment bias that might result from choosing sites that are variable in  
2542 dogs as part of the construction of SNP arrays, we limited this analysis to the whole genome data  
2543 only (Call set 3). In addition we limited our analysis to modern village dogs used in the scaffold  
2544 tree for the MixMapper analysis. All Old World wolves were examined individually. Z-scores  
2545 for significant negative D-statistics were again calculated using a weighted block jackknife, and  
2546 we only considered D-statistics with a Z-score of  $|3|$  when using Andean fox as an outgroup.

2547  
2548 The only significant difference when examining D-statistics of the form  $D(\text{ancient\_sample},$   
2549  $\text{ancient\_sample}, \text{Wolf}, \text{Outgroup})$  was for HXH and NGD sharing more alleles with the Spanish  
2550 wolf than CTC ([Supplementary Table 12](#)). Given that the Spanish wolf likely has substantial  
2551 dog-wolf admixture (See section below), this result is probably because of the decreased  
2552 European component in CTC because of its apparent Indian-like admixture. Though not  
2553 significant, the only genomes CTC was consistently closest to were the Indian and Iranian  
2554 wolves, suggesting this may be the source of wolf admixture observed in this sample.

2555  $f_4$  ratio test

2556 We applied the  $f_4$ -ratio test (`qpF4ratio` in `AdmixTools` package) to estimate ancestry proportions  
2557 in an admixed population for our ancient and modern dogs. Consider a topology where X is  
2558 admixed from two source populations that are ancestral to B and C population, with proportions  
2559  $\alpha$  and  $1-\alpha$ , respectively. The admixture proportion  $\alpha$  is calculated as the ratio between  $f_4(A,O;$   
2560  $X,C)$  and  $f_4(A,O; B, C)$ . Population A is more closely related to population B, and population O  
2561 is an outgroup. We used the Andean fox as the outgroup, Indian dog as A, European dog as B,

2562 Southeast Asian village dog as C. The estimated proportion  $\alpha$  represents European dog ancestry,  
2563 and  $1-\alpha$  represents the southeast Asian dog ancestry. We found around 19.1%-27.8% Southeast  
2564 Asian village dog ancestry in HXH and 20.9%-30.3% Southeast Asian village dog ancestry in  
2565 NGD. ([Supplementary Table 10](#)). We also attempted different orientations of the tree to estimate  
2566 Indian dog ancestry in CTC, but due to the complexity of the admixture, the appropriate  
2567 topology to utilize was unclear. In order to estimate potential dog ancestry in wolves, for each  
2568 wolf as X we used village dogs from South China as A, the Indian wolf as C (based on Fan *et al.*  
2569 <sup>27</sup> this is the wolf amongst our dataset with the least dog ancestry) and alternated each dog as B.  
2570 We then summarized the range of dog ancestry in each wolf ([Supplementary Figure 46](#)). The  
2571 Spanish wolf has the most dog ancestry, 16% to 24%, followed by the Israeli wolf, 12% to 18%,  
2572 then the Chinese wolf, 12% to 17%. Consistent with the hypothesis that the Indian wolf has the  
2573 least dog ancestry, setting the Indian wolf as X produced negative  $\alpha$  values.  
2574

2575

2576

## 2577 **Supplementary Note 11: ADMIXTUREGRAPH analysis**

2578  
2579 ADMIXTUREGRAPH (implemented in `qpgraph` in the `Admixtools` package) performs an  
2580 approximate likelihood maximization to best fit  $f_2, f_3, f_4$  statistics for all combinations of  
2581 populations considered in a user-defined model of population demography that includes  
2582 population split and admixture<sup>44</sup>. `MixMapper` can be considered an automated version of  
2583 ADMIXTUREGRAPH. However ADMIXTUREGRAPH can incorporate more complex models with  
2584 multiple admixture events and ghost populations, providing the opportunity to fit all  $f$ -statistics  
2585 (`MixMapper` only minimizes these within the context of one or two admixture events on a  
2586 scaffold tree). Therefore we drew upon the various demographic inferences from the previous  
2587 analyses to use ADMIXTUREGRAPH to find a model of population demography for our ancient  
2588 and modern canids. We restrict our analyses to the genome data (Call set 3) and utilize the  
2589 Andean fox. We consider a  $f$ -statistic to be fit if the inferred value in the model is within three  
2590 standard errors of the estimated value from the data ( $|Z\text{-score}| > 3$ ), as utilized previously by  
2591 others<sup>46</sup>. Note that occasionally best fit branch lengths between two nodes will have a value of 0.  
2592 While these could be collapsed into descendent nodes, we generally keep them in the graph to  
2593 clearly demonstrated the topology of the model (unless the admixture graph becomes to visually  
2594 unwieldy), as they have no effect on the overall statistical fit of the model.

### 2595 **Fitting HXH and NGD**

2596 We first attempted to fit a model for HXH and NGD (individually at first) and modern village  
2597 dogs as they show a similar pattern of population structure and admixture across various analyses  
2598 involving primarily European ancestry with an additional Southeast Asian component.  
2599 Implementing a model with HXH/NGD being sister to European village dogs and Borneo village  
2600 dogs (representing Southeast Asian village dogs) results in one  $f_4$  outlier. However, allowing the  
2601 ancient samples to be admixed between European and Bornean village dogs results in no outliers  
2602 (i.e. the model fits the data) for both HXH and NGD, with the highest  $Z$ -score being 0.071,  
2603 though HXH demonstrated a slightly higher Southeast Asian-derived component ([Supplementary](#)  
2604 [Figure 19](#)).

2605  
2606 We next included European (represented by the Italian wolf, as this was the least admixed based  
2607 on the  $f_4$ -ratio analysis) and Chinese wolves in the admixture graph model above. When  
2608 including wolves as sister to dogs we obtained 10 outliers. However, when we allowed regional-  
2609 specific admixture from dogs to wolves (as indicated in the `NGSadmix` analysis) we obtained a  
2610 model with only one barely significant  $f_4$  outlier ( $Z=3.074$ ) for HXH, no outliers for NGD, and  
2611 similar admixture proportions for both the ancient samples as before ([Supplementary Figure 47](#)).

2612  
2613 When attempting to include HXH and NGD on the same graph, placing them as sister  
2614 populations descended from a single admixed population resulted in five outliers. One (again  
2615 barely significant,  $Z=3.08$ )  $f_4$  outlier can be obtained when allowing HXH and NGD to have  
2616 distinct admixture events. This is likely not a realistic model but instead reflects the limitation  
2617 that ADMIXTUREGRAPH cannot model differential admixture in a structure population  
2618 ([Supplementary Figure 48](#)).

## 2619 Fitting CTC

2620 In addition to the Europe and Southeast Asian components observed in HXH and NGD, CTC  
2621 appears to possess a complex history, with an ancestry component found predominantly in  
2622 modern Indian village dogs, as well as potentially some Indian admixture. It also appears to be  
2623 genetically closest to HXH, suggesting some level of continuity when considering both samples  
2624 are from Germany. As such, it proved extremely difficult to fit a suitable admixture graph for  
2625 CTC along with other dogs and wolves. Ignoring HXH initially, one model that generates no  
2626 outliers can be obtained by a) adding Indian village dogs to the graph, b) incorporating both  
2627 Southeast Asian dog and wolf admixture into Indian village dogs and c) CTC being the result of  
2628 European and Indian dog admixture ([Supplementary Figure 23](#)). While caution must be applied  
2629 because of the possibility of overfitting such a complex model, we do note that all such events  
2630 were supported by other analyses.

2631  
2632 Incorporating HXH into this model as a descendent of CTC followed by Indian admixture results  
2633 in two  $f_4$  outliers (one barely significant,  $Z=3.013$ ) ([Supplementary Figure 20](#)). While again  
2634 cautioning against overfitting (and we note a very high Indian component in CTC of 71%), this  
2635 model fits the data far better than when CTC and HXH are allowed to descend from distinct  
2636 European lineages, which result in 74 outliers, primarily because ADMIXTUREGRAPH cannot fit  
2637 the  $f$ -statistics involving HXH and CTC as they are too phylogenetically distant on the admixture  
2638 graph. This supports previous analyses suggesting some level of population continuity for the  
2639 European component of HXH and CTC, and that the subsequent Indian-like admixture must  
2640 have occurred into a descendent of HXH.

2641  
2642 Finally, we included NGD into the above model ([Figure 5a](#)). This resulted in four  $f_4$  outliers (but  
2643 still no  $f_2$  or  $f_3$  outliers) ([Supplementary Table 14](#)). While we could potentially add additional  
2644 admixture events or ghost populations to eliminate these outliers, given the complexity of the  
2645 admixture graph already, we feel it would be unreasonable to do so, especially since we do not  
2646 consider the effects of multiple testing when utilizing the Z scores.

2647  
2648

2649

2650

## 2651 **Supplementary Note 12: G-PhoCS analysis to determine Neolithic-** 2652 **Modern European divergence time**

### 2653 G-PhoCS settings

2654 G-PhoCS<sup>36</sup> is a full-likelihood-based method that uses independent loci in order to perform  
2655 Bayesian coalescent-based inference of divergence times ( $\tau$ ), population diversity ( $\theta$ ) and, if  
2656 specified, migration bands. To apply this method to our canid data and estimate when our ancient  
2657 samples (and in particular our oldest sample, HXH) may have diverged from modern European  
2658 samples, we performed a LiftOver on the 16,434 “neutral loci” (interspersed genomic segments  
2659 of 1kb length) previously identified by Freedman *et al.*<sup>25</sup>. We then generated alignments at these  
2660 loci that included the golden jackal, multiple Old World wolves (Israeli, Croatian, Chinese and  
2661 Indian), several village (each from South China, India and Portugal) and breed dogs (boxer and  
2662 dingo), and the two ancient samples. Genotypes for all samples were called from recalibrated  
2663 BAM files using reads with mapping quality  $\geq 15$  and base quality  $\geq 15$  for modern samples,  
2664 and calls with genotype qualities less than 30 and less than 7x coverage were marked as ‘N’.  
2665 Ancient samples were called as described above (see [Supplementary Note 5](#)). We masked sites  
2666 for all samples if any sample appeared to have a ‘CpG’ dinucleotide sequence and removed loci  
2667 if any sample had complete missing data. As we tested many different combinations of samples  
2668 and as G-PhoCS is computationally intensive, we often randomly selected 5,000 loci to perform  
2669 the analysis. The final results presented in [Figure 5](#) however are based on the full data set  
2670 (16,434 loci), as well as select analyses where indicated. When the two ancient samples were  
2671 included, we set the age of HXH to be 7,000 years old and the age of CTC to be 5,000 years old  
2672 assuming the mutation rate  $\mu = 1 \times 10^{-8}$  bp/generation and generation time = 3 years. For each run  
2673 we ran 500,000 MCMC iterations and used Tracer<sup>47</sup> to examine the chain convergence.

### 2674 G-PhoCS results

2675 We built a NJ tree based on the neutral loci alignments on selected samples using the same  
2676 method as described in [Supplementary Note 9](#). This tree and the global NJ tree were largely  
2677 concordant ([Supplementary Figure 49](#)). We ran G-PhoCS on the following tree structure,  
2678 (((((Boxer, Village\_Europe), Village\_India), Village\_ChinaS), ((wolfY, IsraeliWolf),  
2679 ChineseWolf)),GoldenJackal) ([Figure 5b](#)), with wolfY either being the Croatian or Indian wolf.  
2680 We then ran G-PhoCS with each ancient sample added separately, with HXH or CTC sister to  
2681 the ancestral of boxer and Village\_Europe. For the migration bands, we set Village\_ChinaS dog  
2682 with the Chinese wolf, and other modern village dogs with the Israeli wolf, Village\_India dog  
2683 with the Indian wolf, the Israeli wolf with the golden jackal, and dog/wolf ancestors with golden  
2684 jackal. Evidence for these migration bands either come from significant  $D$  statistics calculated by  
2685 `Admixtools` ([Supplementary Table 24](#)) or were previously identified by Freedman *et al.*<sup>25</sup>. For  
2686 ancient samples, we added migration between South China village dogs and HXH, Indian village  
2687 dogs and CTC, South China village dogs and NGD, and each wolf with the ancient samples. We  
2688 found that 500,000 iterations were sufficient to establish convergence for all parameters and we  
2689 sampled the the last 200,000 iterations to estimate the posterior distribution and calculate the  
2690 95% CI for each parameter.

2691  
2692 When assuming the slower mutation rate,  $\mu$ , of  $4 \times 10^{-9}$  bp/generation (also see next section),

2693 examining only modern village dogs resulted in an estimate of the Asian and non-Asian dog  
2694 divergence time of 17,500 to 23,900 years ago and dog-wolf divergence time approximately  
2695 36,900 to 41,500 years ago. As seen previously in<sup>25,27</sup>, we observed that wolves appeared to  
2696 diverge rapidly (within the space of ~1,000 years). The branching of the main dog lineages  
2697 occurred over a much longer period of time: after the initial Asian-non-Asian dog divergence,  
2698 the divergence between Indian and European dogs occurred around 13,700 to 17,900 years ago,  
2699 while the divergence between European village dogs and modern breeds were around 4,300 to  
2700 9,300 years ago. (Supplementary Figure 50, Supplementary Table 15). We found that using the  
2701 Indian or Croatian wolves generally gave similar results to each other. We compared our  
2702 divergence time estimates with the ones in previous studies using G-PhoCS (Supplementary  
2703 Table 16). We found that dog-wolf divergence time is similar to Freedman's estimates when  
2704 using the same mutation rate; however our dog divergence time is younger than the Freedman *et*  
2705 *al.*<sup>25</sup> estimate (33,000 years) but similar to the Wang *et al.*<sup>38</sup> estimate (24,000 years)<sup>38</sup>. This  
2706 discrepancy appears to be result of the sample used to represent the southeast Asian lineage.  
2707 Freedman *et al.* used the dingo<sup>25</sup>, while our study and Wang *et al.*<sup>38</sup> used village dogs from  
2708 South China. When we changed the village dog from South China to dingo, we observed higher  
2709 dog divergence time estimates, while other estimates remain the same (Supplementary Table 15).  
2710 We primarily emphasize result using the village dogs versus the dingo<sup>25</sup> because the latter are  
2711 generally considered to be only semi-domesticated.

2712  
2713 When adding either of the ancient dogs, we found that the divergence time between European  
2714 dogs and CTC was ~18,000 years and HXH more than 30,000 years, much older than the  
2715 estimated European-Indian dog split inferred from using only modern samples. These in turn led  
2716 to a larger European-Indian dog split (similar to the divergence time between European and  
2717 ancient dog) and dog wolf divergence time almost double the original (60,000-80,000 years).  
2718 Though our genotype calling did substantially lower the number of false positive due to post-  
2719 mortem damage, when examining the number of private variants for our two ancient samples at  
2720 these loci, we found a slight excess compared to the modern European village dogs. Thus we  
2721 anticipate that false positive singleton variants due to the post-mortem damage and lower  
2722 coverage of the two ancient samples may be artificially elongating branch lengths in the G-  
2723 PhoCS analysis. Therefore we devised a new method for estimating the HXH-European split  
2724 time using the G-PhoCS results for only the modern samples as a baseline that would be robust  
2725 to this signal (see below Supplementary Note 13). We also tried adding NGD to the G-PhoCS  
2726 analysis, which was sequenced to 28X. The divergence time for European and NGD was  
2727 ~20,000 years ago, and the European-Indian dog ~ 23,000 years ago, much older than the  
2728 estimated European-Indian dog split inferred from using only modern samples. Although NGD  
2729 has higher coverage and better genotype calls, false positive singleton variants due to the post-  
2730 mortem damage are likely still affecting G-PhoCS results (Supplementary Figure 51). As seen  
2731 in Supplementary Note 5, even with this high coverage using standard genotype callers will still  
2732 substantially overestimate C>T and G>A mutations, while our aDNA genotype caller may still  
2733 not fully capture all damage despite clearly improving the overall false positive rate.

2734  
2735 We found that the effective population size of village dogs are 5 to 10 folds higher than that of  
2736 boxer. The effective population size of Israeli wolf is the highest among all wolves and golden  
2737 jackal (Supplementary Figure 52). We also inferred the total migration rate in our analysis,  
2738 calculated by multiplying migration rate with the time that both population exists during the

2739 migration period. Total migration rate can be viewed as the probability that a lineage in the target  
2740 population will migrate into the source population ([Supplementary Figure 53](#)). We found that  
2741 there was significant non-zero migration from Israeli wolf to boxer, European village dog and  
2742 Indian village dog. We also found that the total migration rate from the Israeli wolf to Indian  
2743 village dogs was around 0.47 when utilizing Croatian wolf as WolfY, much higher than  
2744 estimated migration to other dogs. However, when utilizing the Indian wolf as WolfY, the total  
2745 migration rate from the Israeli wolf to Indian village dogs was reduced to 0.02, while total  
2746 migration rate from Indian wolves to Indian village dogs was 0.34, suggesting this was the more  
2747 likely source of wolf admixture in Indian village dogs. We hypothesize that this signal is of  
2748 similar origin to the high migration rate (0.12-0.24) observed in Freedman *et al.*<sup>25</sup> between the  
2749 Israeli wolf to basenji. We also found significant non-zero migration between the Chinese wolf  
2750 and village dogs from South China, the Israeli wolf to the golden jackal and a dog/wolf ancestors  
2751 to the golden jackal, all of which again are concordant with the results from Freedman *et al.*<sup>25</sup>.

2752  
2753 We also performed a G-PhoCS analysis using the same phylogeny but without any migration  
2754 band setting. We found that the divergence time among wolves and the divergence time of  
2755 dog/wolf ancestral population were smaller when migrations between wolves and dogs are  
2756 neglected. However, the divergence time amongst dogs were not affected with/without migration  
2757 ([Supplementary Figure 54](#)).

2758  
2759 In order to confirm that the divergence time between Asian and non-Asian dogs is not affected  
2760 by the choice of outgroup and possible migration between golden jackal and Old World wolves,  
2761 and between dogs and wolves, we performed another G-PhoCS analysis using the following tree  
2762 structures, (((Village\_Europe1,Village\_Europe2), (Village\_ChinaS1, Village\_ChinaS2)), (yellowstoneWolf1, yellowstoneWolf2)), outgroup), with outgroup being either golden jackal or  
2763 Andean fox and no migration settings. We found that the divergence time between Asian and  
2764 European dogs were ~17,000 years ago (95% CI: 11,700-21,000) when using golden jackal as  
2765 outgroup, and ~14,200 years ago (95% CI: 10,700-16,600) when using Andean fox as an  
2766 outgroup ([Supplementary Figure 55](#)).

2767  
2768  
2769

2770

2771

2772 **Supplementary Note 13: Numerical estimation of the HXH/NGD-**  
2773 **modern European divergence time**

2774 Summary of Numeric approach

2775 As described above, estimating the divergence time of HXH and NGD using G-PhoCS could  
2776 potentially lead to large biases due to false positive singleton variants observed in HXH that are  
2777 caused by post-mortem damage and the somewhat lower coverage of our ancient samples.  
2778 Therefore we devised a method that would be robust to these issues. In particular, we utilized  
2779 demographic parameters estimated by G-PhoCS ( $\tau$  and  $\theta$ ) that describe the relationship between  
2780 European, Indian and East Asian village dogs, and then inferred the HXH/NGD divergence time  
2781 by using coalescent theory to predict the ratio of shared derived sites between European village  
2782 dogs and HXH/NGD versus European and Indian Village dogs. We first give the expectation  
2783 considering a simple bifurcating tree for Europe, HXH/NGD and India, and then consider the  
2784 expectation assuming East Asian admixture into HXH/NGD.

2785 No Admixture

2786 We assume the population tree shown in [Supplementary Figure 24](#). Our main problem is false  
2787 positives that appear as mutations on the branch leading to HXH/NGD after diverging from  
2788 Europe. In order to limit this effect, we will condition on whether derived mutations (identified  
2789 via an outgroup) present on a European chromosome but absent on an Indian chromosome are  
2790 also present on one of the HXH/NGD chromosomes or not (110 sites). In addition, as  
2791 HXH/NGD and Europe are sister clades versus India, there should be more such sites than those  
2792 where mutations are shared between a European and Indian chromosome, but not a HXH/NGD  
2793 chromosome (101 sites). This ratio should be approximately equal to the ratio of genealogies  
2794 with these two topologies across the genome. To infer this we need to consider two types of  
2795 parameters, the amount of population diversity,  $\theta$  and the divergence time measured in expected  
2796 numbers of mutations,  $\square$ . With these we can use coalescent theory to predict the relative number  
2797 of 110 versus 101 genealogies.

2798  
2799 There are two scenarios that would lead to 110 sites. In the first there is a coalescent event,  $\mathcal{C}$ ,  
2800 between a HXH/NGD and European lineage between  $\square_1$  and  $\square_2$ , which will depend on  $\square_1$ .  
2801 Using standard coalescent theory<sup>48</sup>, this will occur with the following probability:

$$P(\mathcal{C}_{\tau_1 < t < \tau_2}) = 1 - e^{-\frac{2}{\theta_1}(\tau_2 - \tau_1)}$$

2802  
2803  
2804 In addition, no coalescence could occur during the period after, which there is 1/3 chance that the  
2805 next coalescent event will be between a HXH/NGD and European chromosomes (versus an  
2806 European and Indian chromosome or a HXH/NGD and Indian chromosome). Thus the  
2807 probability of observing a 110 compatible genealogy is:

$$P(110) = \left(1 - e^{-\frac{2}{\theta_1}(\tau_2 - \tau_1)}\right) + \left(\frac{e^{-\frac{2}{\theta_1}(\tau_2 - \tau_1)}}{3}\right)$$

2808



2809

2810 Similarly, the probability of observing a 101 compatible genealogy is:

$$P(101) = \frac{e^{-\frac{2}{\theta_1}(\tau_2-\tau_1)}}{3}$$

2811

2812

2813 The expected ratio is then simply  $P(110)/P(101)$ .

## 2814 East Asian Admixture

2815 We have found that HXH/NGD demonstrate evidence of small but statistically significant  
 2816 admixture with a population resembling modern Southeast Asian dogs, which may decrease the  
 2817 number of occasions where HXH/NGD and Europe chromosomes coalesce before an Indian  
 2818 chromosome compared to the expectation above. We denote this admixture fraction,  $\alpha$ , and  $\beta$   
 2819  $= 1 - \alpha$ . The probability of observing a 110 now depends on whether the chromosome chosen in  
 2820 HXH/NGD traces its ancestry through East Asia or not. If it does not, then the probability of  
 2821  $P(110)$  is simply the same as above multiplied by  $\beta$ . If it does, then the probability of a 110  
 2822 compatible genealogy depends on whether the European and Indian chromosome coalesced  
 2823 between  $\tau_2$  and  $\tau_3$ , which will depend on  $\theta_2$  (i.e. essentially the reverse situation to before).  
 2824 Thus, the new total probability of a 110 genealogy is:

$$P(110) = \beta \left[ \left( 1 - e^{-\frac{2}{\theta_1}(\tau_2-\tau_1)} \right) + \left( \frac{e^{-\frac{2}{\theta_1}(\tau_2-\tau_1)}}{3} \right) \right] + \alpha \left[ \frac{e^{-\frac{2}{\theta_2}(\tau_3-\tau_2)}}{3} \right]$$

2825

2826 Similarly, the new probability of a 101 genealogy is:

2827

$$P(101) = \alpha \left[ \frac{e^{-\frac{2}{\theta_1}(\tau_2-\tau_1)}}{3} \right] + \beta \left[ \left( 1 - e^{-\frac{2}{\theta_2}(\tau_3-\tau_2)} \right) + \left( \frac{e^{-\frac{2}{\theta_2}(\tau_3-\tau_2)}}{3} \right) \right]$$

2828

## 2829 Application and Advantages

2830 We are interested in estimating the HXH/NGD-Europe split time, so  $\theta_1$ . Therefore we use  
 2831 estimates for  $\theta_2$ ,  $\theta_3$ ,  $\theta_1$  (we assume the  $N_e$  of the boxer-European ancestral population is the  
 2832 same as that of the HXH/NGD-European ancestral population) and  $\theta_2$  from the G-PhoCS  
 2833 analysis of modern samples and estimates  $\theta$  from the  $f_4$  ratio test. We then find the value of  $\theta_1$   
 2834 from our equations that is compatible with the observed 110/101 ratio. When comparing this  
 2835 expectation to real data it is also assumed that sites (i.e. genealogies) are independent. To take  
 2836 into account dependence amongst linked sites we utilize a weighted block jackknife<sup>49</sup> to  
 2837 estimate confidence intervals.

## 2838 Results

2839 Using the whole genome SNP set, we computed the observed ratio of the number of SNPs where  
 2840 i) a European village dog and HXH have the derived allele and an Indian sample has the

2841 ancestral allele versus ii) a European and Indian village dog have the derived allele and HXH has  
2842 the ancestral allele. We took the allele with the highest probability from one sample of each  
2843 population. We tried using either golden jackal or andean fox to determine the ancestral allele.  
2844 However, we found estimates in the former to be somewhat higher than in the latter. The golden  
2845 jackal is known to be admixed with wolf populations<sup>25,50</sup> while recurrent mutation on the longer  
2846 andean fox lineage may cause underestimation. Therefore, we use the sites where the golden  
2847 jackal and andean fox are concordant as the ancestral allele. In order to compute the confidence  
2848 interval of this estimate, we took a weighted jackknife approach using windows of 10cM  
2849 (Supplementary Table 17). The jackknife estimate of this ratio is 1.201485 for HXH, with  
2850 standard error 0.016 (i.e. European dogs share more derived alleles with HXH a than Indian  
2851 village dogs, as per expectations).

2852  
2853 We sampled several parameters, namely  $N_e$  for European/boxer ancestral population ( $\theta_1$ ),  $N_e$  for  
2854 European/Indian ancestral population ( $\theta_2$ ), time of divergence for Europe and boxer ( $\tau_0$ ), time of  
2855 divergence for Europe/India ( $\tau_2$ ) and time of divergence for Europe-India/Asia ( $\tau_3$ ) based on the  
2856 estimates from G-PhoCS analysis (Supplementary Table 23), and also the percentage of HXH  
2857 that is made up of Asian admixture ( $\alpha$ ) from the  $f_4$ -ratio analysis. We then sampled  $\tau_1$  from a  
2858 uniform distribution of ( $\tau_0, \tau_2$ ). We computed the ratio using the analytical formula explained  
2859 above and kept 1000  $\tau_1$  estimates if the ratio fell into the range: [1.185939, 1.217031]. Based on  
2860 this, the mean value of  $\tau_1$  was estimated as  $1.3 \times 10^{-5}$  and the 95% confidence interval as  $8.6 \times$   
2861  $10^{-6}$  to  $1.7 \times 10^{-5}$  (Supplementary Figure 25A). If we assume that this divergence time is older  
2862 than 7,000 years ago, then  $\mu$  has an upper bound with mean value  $5.6 \times 10^{-9}$  per generation and  
2863 95% CI of  $3.7 \times 10^{-9}$  to  $7.4 \times 10^{-9}$  (Supplementary Figure 25C), which is consistent with the  $\mu=4$   
2864  $\times 10^{-9}$  per generation suggested by Skoglund *et al.*<sup>51</sup>. When using the  $\mu=4 \times 10^{-9}$  rate, the mean  
2865 divergence time between HXH and European village dogs is 9,719 years ago, with a 95% CI of  
2866 6,483 to 12,910 years ago. We also tested our method by replacing HXH with Boxer and  
2867 estimated the divergence time between boxer and European to be  $8.84 \times 10^{-6}$  (6,630 years ago) as  
2868 the mean value and  $4.1 \times 10^{-6}$  to  $1.41 \times 10^{-5}$  as the 95% CI, while the mean G-PhoCS estimate of  
2869  $\tau_0$  was  $8.5 \times 10^{-6}$  (6,375 years ago) with a 95% CI of  $5.76 \times 10^{-6}$  -  $1.24 \times 10^{-5}$  (Supplementary  
2870 Figure 25B, red as mean, blue as confidence intervals, dashed lines are the G-PhoCS estimates).  
2871 We also estimated the divergence time between NGD and European village dogs, with mean  
2872 divergence time 9,588 years ago with a 95% CI of 6,365 to 12,592 years ago, similar to the  
2873 divergence time between HXH and European village dogs.

2874

## 2875 **Supplementary Note 14: Haplotype and CNV analysis at** 2876 **domestication loci**

### 2877 Genotype matrices and NJ trees

2878 Thirty-six putative domestication loci were previously identified by Axelsson *et al.*<sup>52</sup> as  
2879 exhibiting significant differences in pooled heterozygosity ( $H_p$ ) and  $F_{ST}$  in modern breed dogs  
2880 compared to wolves<sup>52</sup>. Coordinates of the 30 significant autosomal  $F_{ST}$  windows were lifted over  
2881 to the CanFam3.1 assembly coordinates, resulting in windows ranging from ~200kb to ~1.5Mb  
2882 in length (Supplementary Table 18). We constructed visual genotype matrices for each locus to  
2883 assess haplotype patterns at candidate selective loci. We extracted SNPs from within our whole  
2884 genome SNP dataset (Call set 1, using the PLINK make-bed tool with no missing data filter) that  
2885 were located in these windows, totalling 23,098 sites. For ease of viewing of each locus in matrix  
2886 format, we further removed SNPs with minor allele frequencies less than 0.05 and greater than  
2887 0.49, resulting in 7,747 sites. Eigenstrat genotype file formats were generated per window  
2888 using `convertf` from the EIGENSOFT package<sup>53</sup> and custom scripts were used to convert the  
2889 genotype files into matrix formats for visualization using `matrix2png`<sup>54</sup>.

2890  
2891 Assignment of ancient dogs to either being more wild-like or dog-like relied upon putative  
2892 domestication loci that confidently distinguished genotypes of dogs from wild canines (wolves,  
2893 coyotes, jackals, etc.). To determine whether swept dog haplotypes could be clearly defined for  
2894 each  $F_{ST}$  locus defined in Axelsson *et al.*<sup>52</sup>, we first calculated the proportion of reference (or  
2895 “dog”) alleles versus non-reference (putatively wild) alleles per sample using the SNP set  
2896 without minor allele frequency filtration. These estimates were obtained for each window. If  
2897 25% or more dogs exhibited an average reference allele count less than 95% (i.e. more wild-like)  
2898 or if less than 75% of wolves and other outgroups had an average reference allele count greater  
2899 than 95% (i.e. more dog-like), the locus failed to reach the minimum requirement. One exception  
2900 was made for  $F_{ST}$  window 23 (chr16: 6828779-7342805) because a strong, clear sweep can be  
2901 distinguished that maintains previous requirements within a subset of the window (chr16:  
2902 7108869-7342805). Finally, the three ancient dog samples were classified as being more dog or  
2903 wild-like if the sample had an average reference allele count <95% in a  $F_{ST}$  window that passed  
2904 previous filtration steps (above).

2905  
2906 Finally, NJ trees were estimated for each domestication locus with the filtered SNP sets (without  
2907 minor allele frequency filtration) using the same methods as the whole-genome tree estimation  
2908 and rooting with the Andean fox (Supplementary Note 8), but with genomic window sizes of  
2909 0.01 cM. We note that the bootstrap support within the dog clade is low because of the high  
2910 identity among the dog haplotypes at these loci, which have likely undergone strong selective  
2911 sweeps. Additionally, due to rapid, recent expansion in dogs since breed formation, visualizing  
2912 relationships within the dog clade is difficult due to the collapsing of the tree branches. For this  
2913 reason, each NJ tree has been drawn with proportional branches to simplify viewing relationships  
2914 among the samples. Only a subset of the loci are detailed in this Supplementary Methods section,  
2915 but trees and underlying data for all loci are available on request.

## 2916 Copy Number Estimation

2917 Copy-number was estimated from mapped read depth using methods previously developed for  
2918 the analysis of human copy-number variation<sup>55,56</sup>. To tabulate read depth, we divided reads into  
2919 non-overlapping 36-bp segments and mapped them to a masked version of the CanFam3.1  
2920 reference using `mrsFAST`<sup>57</sup> with an edit-distance threshold of two. Since `mrsFAST` returns all  
2921 possible placements of a read, we performed aggressive masking of the reference genome prior  
2922 to mapping. All elements identified by `RepeatMasker` or `Tandem Repeat Finder`<sup>58</sup>  
2923 were masked out. Since the repeat classification of the genome may be incomplete, we  
2924 additionally masked out over-represented 50 mers, defined by searching a sliding window of 50-  
2925 bp (with an overlapping step size of 5) against the genome and removing all sequences with at  
2926 least 20 hits within an edit distance of two. Due to a shadow effect of introduced gaps by read  
2927 mapping, we further padded these masked segments by 36 bp on each side, resulting in the  
2928 ability to interrogate 48% of the genome. For GC-correction and the conversion of read depth to  
2929 copy-number, we defined a set of autosomal control regions that excluded sites reported to be  
2930 duplicated or copy-number variable<sup>25,59-61</sup>. A GC-correction curve was determined based on a  
2931 loess fit of read depth and GC content within 400 bp of each position. Copy-number was  
2932 estimated based on the mean depth in non-overlapping windows each consisting of 3kb of  
2933 unmasked sequence. Amylase copy-numbers were estimated using the window  
2934 `chrUn_AAEX03020568:4873-8379`, which overlaps the 5' end of the *AMY2B* gene model.

## 2935 Results

### 2936 Candidate Domestication Regions

2937 We note that clear distinctions in haplotypes between the dogs and wolves was not observed in  
2938 twelve of the thirty windows ( $F_{ST}$  windows 6, 7, 8, 14, 15, 16, 22, 24, 27, 29, 30, and 32 failed).  
2939 This has likely occurred for two possible reasons. First, these previously calculated windows  
2940 were identified by significant  $F_{ST}$  deviations through comparisons of breed dogs and wolves  
2941 only, without the inclusion of genetically diverse village dogs that have historically undergone  
2942 less artificial selection resulting from breed development<sup>31,62</sup>. Second, the original study<sup>52</sup> was  
2943 completed on an older canine reference (CanFam2). Subsequent structural rearrangements in the  
2944 newer dog assembly (CanFam3.1) may have either (i) eliminated the signal originally observed  
2945 or (ii) added sequence that that may not have been under selection, which can be observed in the  
2946 increased size of the windows relative to the original study ([Supplementary Table 18](#)). To  
2947 address the second concern, we have focused on regions that have maintained clear dog versus  
2948 wolf haplotypes while disregarding the “variable” regions when genotyping the ancient samples  
2949 as either more like modern dogs or wild canids ([Supplementary Table 19](#)).

2950  
2951 Two patterns become evident upon inspection of haplotype patterns at the eighteen loci that  
2952 passed initial filtration. First, there is a clear distinction between breed (blue; 0/0) and wolf  
2953 (orange; 1/1) haplotypes, with heterozygotes (white) typically enriched in village dogs in the  
2954 middle of each matrix (see [Figure 6a](#)). This is expected given the methods used by Axelsson *et*  
2955 *al.*<sup>52</sup> to identify these loci. The “wild” (non-reference) haplotypes are often found in New and  
2956 Old World wolves, coyotes, and the golden jackal. The haplotypes of the three ancient dogs (top  
2957 rows) appear to be more closely related to breeds and village dogs than to wolves (results for all  
2958 loci are available on request). In loci that deviate from this pattern, the older ancient dog (HXH)  
2959 carries the “wild-like” haplotype in only one window ( $F_{ST}$  window 13), whereas CTC more often

2960 is heterozygous for the a “wild” haplotype (“white”; six windows total) ([Supplementary Table](#)  
2961 [19](#)). This is consistent with our additional population-level analyses that identified considerable  
2962 CTC admixture with wolf. Additionally, the younger, Irish ancient dog (NGD) is heterozygous  
2963 for the wild-like haplotypes in two windows. These results are mirrored in the estimated NJ  
2964 trees, where most topologies place the ancient samples in the dog clade, with more examples of  
2965 CTC grouping with wild canids than HXH and NGD.

2966  
2967 From previous genome-wide selection scans between dogs and wolves, genomic windows under  
2968 significant selection appear to be enriched for genes involved in starch metabolism and behavior  
2969 <sup>52,63</sup>. Three loci that were highlighted in the analyses of Axelsson *et al.* <sup>52</sup> harbor genes critical  
2970 for starch digestion in canines, and were putatively linked to the domestication of wolves as  
2971 detected by selective sweeps (significant deviation in  $F_{ST}$ ) between breed dogs and wolves. Two  
2972 of these three regions ( $F_{ST}$  windows 12 and 23) were successfully lifted over from the previous  
2973 dog reference assembly (CanFam2) to the updated CanFam3.1, whereas the  $F_{ST}$  region on chr26  
2974 failed ( $F_{ST}$  window 31) due to lack of SNP support.

2975  
2976 The first stage of starch processing in canines involves the pancreatic alpha-amylase gene  
2977 (*AMY2B*) which is harbored in  $F_{ST}$  window 12 on chromosome 6. This gene is usually considered  
2978 the hallmark for selection from domestication, where increases in copy-number for *AMY2B* may  
2979 have provided a selective advantage for enhanced abilities for starch digestion <sup>25,52,64</sup>. Reference  
2980 allele frequencies highlight the differences between dogs and wolves in this window, with wild  
2981 canids and wolves (excluding the Spanish wolf) carrying fewer dog alleles compared to dogs  
2982 ([Supplementary Figure 56](#)). Our results indicate a clear dog haplotype in the genotype matrices  
2983 for regions surrounding the *AMY2B* gene locus that are shared between both breeds and village  
2984 dogs ([Figure 6a](#)). In contrast, wolves and other canids (jackal, fox, and coyotes) primarily have  
2985 the “wild” haplotype in this region. Distinct dog exceptions include the standard poodle (osp),  
2986 the Siberian husky, the dingo, and the Late Neolithic dog, CTC. Intriguingly, the older of the  
2987 ancient dogs (HXH, early Neolithic) carries the “dog” haplotype. Exhibiting heterozygosity near  
2988 the *AMY2B*, the NGD haplotype is similar to the mastiff, bulldog, toy poodle, and some village  
2989 dogs, making it “wild-like”. Consistent with earlier results that suggest recent admixture with  
2990 dogs in the sample ([Supplementary Note 10](#)), the wild outlier here is the Spanish wolf (spw),  
2991 which appears to be largely heterozygous in this window, reflecting the observed higher  
2992 proportion of reference alleles in the window ([Supplementary Figure 56](#)).

2993  
2994 From the NJ tree of the whole SNP set for the *AMY2B* window ([Supplementary Figure 57](#)), we  
2995 observe a distinct wild clade (BS = 100) that contains wolves, coyotes, and the jackal. Amongst  
2996 the Old World wolves, the dog outliers (dingo and standard poodle) are clustered, mirroring their  
2997 haplotype patterns in the genotype matrix ([Figure 6a](#)). CTC is confidently placed as sister to all  
2998 dogs (BS = 91), highlighting the “wild” component in the CTC haplotype at this locus (0.850  
2999 observed reference allele proportion; [Supplementary Table 19](#)). The Spanish wolf is also placed  
3000 in a basal position, sister to dogs, but with low BS support (BS = 26), likely due to the level of  
3001 detectable dog admixture in this wolf. NGD (0.851 observed average reference allele count) is  
3002 placed in a clade with the Siberian husky and a North Chinese village dog (Dog04; BS = 54), at  
3003 basal positions in the dog clade. Finally, HXH is positioned well within the dog (breeds and  
3004 village dogs) clade, and sister to the Mexican hairless dog, the xoloitzcuintli (BS = 87).  
3005 Interestingly, none of the ancient dogs carry the extreme copy-number expansion of *AMY2B*,

3006 despite being either homozygous or heterozygous for the dog haplotype (Figure 6).

3007  
3008 To further define the extent of haplotype sharing at this locus among modern and ancient  
3009 samples, we performed an IBD analysis using the Refined IBD algorithm in Beagle v 4.1  
3010 <sup>65</sup>. Analysis was limited to village dogs and ancient dog samples, and only sites with a minor  
3011 allele frequency  $\geq 0.05$  were considered. We utilized the genetic map from Auton *et al.* <sup>23</sup> and  
3012 ran Refined IBD with options: chrom=6, window=50000, overlap=2000,  
3013 ibdtrim=50. Analysis was repeated ten times with different random seeds and results were  
3014 combined using ibdmerge.jar. We identified 31 IBD segments that intersected with the  
3015 *AMY2B* region ( $F_{ST}$  Window 12), two of which involved at least one of the ancient dogs (one  
3016 between HXH and QA5, and another between HXH and NGD). The 29 IBD segments among the  
3017 village dogs have a median length of 0.6796 cM (763.6 kbp), while the HXH-QA5 segment has a  
3018 length of 0.6132 cM (582.1 kbp), and the HXH-NGD segment has a length of 0.3534 cM (457.2  
3019 kb). Although these approaches have a limited ability to detect short IBD segments, this analysis  
3020 suggests that the shared haplotypes around *AMY2B* extend for longer distances among the  
3021 contemporary samples, consistent with a more recent sweep at this locus driven by *AMY2B* copy  
3022 number.

3023  
3024 The second stage of starch digestion involves the activity of *MGAM* (maltase-glucoamylase),  
3025 which facilitates the conversion of oligosaccharides to glucose as part of a larger metabolic  
3026 pathway. According to the genotype matrix for this locus, the *MGAM* gene is located in the less  
3027 variable region of  $F_{ST}$  Window 23 (Supplementary Figure 58), along with the bitter taste  
3028 mediating receptor (*TAS2R38*) and a C-type lectin domain family 5 gene (*CLEC5A*). Again, this  
3029 region highlights a locus that has likely undergone selective sweeps, as indicated by pronounced  
3030 differentiation between the dog and wild haplotypes. For the assignment of dog and wild  
3031 haplotypes, average reference allele counts were calculated separately in the less variable portion  
3032 of the window (chr16: 7125960-7303209), where the selective sweep is apparently more  
3033 pronounced (Supplementary Figure 59). Again, clear delineations of reference allele counts can  
3034 be observed between the wolves and other canids, compared to both breed and village dogs.  
3035 Exceptions of this pattern include the two Mexican wolves, and a handful of dogs. Unlike the  
3036 previous locus, all three ancient samples carry the dog haplotypes with 0.994, 0.996, and 0.997  
3037 in HXH, CTC, and NGD, respectively. This result is also supported from the resulting NJ tree  
3038 (from all SNPs in the window) that indicates both CTC and HXH firmly within the dog clade  
3039 (Supplementary Figure 60). The tree also strongly supports monophyletic wolf/coyote (excluding  
3040 the Mexican wolves also observed to deviate in Supplementary Figure 59) and dog clades with a  
3041 bootstrap score of 93, which emphasizes that the time of this significant sequence divergence  
3042 between dogs and wild canines pre-dates, at least, 7,000 years before present, since HXH carries  
3043 the dog haplotype.

#### 3044 *AMY2B* Copy Number Variation

3046 In contrast to HXH and CTC, and the results of Frantz *et al.* <sup>22</sup>, our analysis estimates that NGD  
3047 carried three copies of the *AMY2B* gene. Several differences in the methods for copy number  
3048 estimations exist between this study and Frantz *et al.* <sup>22</sup>, including correction for local GC content  
3049 and the exclusion of known CNVs from regions used to normalize read depth.

3050  
3051 Closer examination of the estimated copy number profiles revealed the presence of a larger, ~2

3052 megabase duplication that overlaps the *AMY2B* locus on chromosome 6 and extends proximally  
3053 ([Supplementary Figure 26](#)). This duplication is present in eleven of the samples we analyzed.  
3054 NGD is heterozygous for this duplication, but does not carry the extreme *AMY2B* copy number  
3055 increase that is presumed to arise from tandem expansion of the gene region<sup>52</sup>.  
3056  
3057

3058

3059

## 3060 **Supplementary Note 15: Comparison with Newgrange dog analysis** 3061 **in Frantz *et al.***

3062  
3063 We incorporated the recently published NGD<sup>22</sup> into our major analyses. However, we identified  
3064 multiple discrepancies between our results and those of Frantz *et al.*<sup>22</sup>. Below we describe the  
3065 major differences in analysis and conclusions.

### 3066 PCA

3067 Frantz *et al.*<sup>22</sup> performed a PCA on a genome-wide data set, with and without transitions (Figure  
3068 S8 and Figure S9 in Frantz *et al.*<sup>22</sup>). They find that NGD is located outside of the modern dogs  
3069 clusters in the PC space and thus suggested that “*the Newgrange dog may retain some degree of*  
3070 *ancestry from an ancient (extinct) European population*”. This result is in contrast to our PCA of  
3071 NGD, CTC, and HXH. We found that the observation of NGD being an outlier is a technical  
3072 artifact that occurred when the PCA was performed on both the uncalibrated and calibrated  
3073 ancient genome sample in the same analysis. This results in extremely high covariance between  
3074 the duplicate sample call sets, which caused them to dominate that second PC. We replicated the  
3075 PCA using the same 269,512 transversions ascertained solely in the genome-wide data-set from  
3076 Frantz *et al.*<sup>22</sup>, with and without doubling the NGD dog ([Supplementary Figure 11](#)). We found  
3077 that NGD moves back into the general dog cluster in the Frantz *et al.*<sup>22</sup> sample set, next to  
3078 European village dogs and modern breeds, when only one NGD call set was used, a result similar  
3079 to what we observed previously ([Supplementary Note 9](#)).  
3080

3081 However, even with such corrections, this PCA still differs from our previous PCA as the two  
3082 Russian wolves appear to cluster amongst other dogs, and the population structure between  
3083 breeds and village dogs is largely absent. To address this discrepancy, we performed a PCA  
3084 using the exact SNP sites as Frantz *et al.*<sup>22</sup>, but extracted the calls from our sample set. Only  
3085 then could we obtain a similar structure that corresponded with our other PCAs ([Supplementary](#)  
3086 [Figure 12](#)). Therefore, in addition to the technical error regarding sample duplicates, the overall  
3087 ascertainment of samples also contributes to the differences in PCA plots and our failure to  
3088 replicate the PCA. Since our dataset contains a substantially more diverse collection of samples,  
3089 which includes various breeds and village dogs from all over the world, we assert that our PCA  
3090 results are more reflective of total dog diversity.

### 3091 Divergence time between dogs

3092 Frantz *et al.*<sup>22</sup> used an MSMC approach to estimate the split time between Asian and non-Asian  
3093 dogs. However, MSMC requires phased haplotypes from all samples. Statistical phasing errors in  
3094 human haplotypes result in a more recent split time estimates<sup>66</sup>. The performance of statistical  
3095 phasing on dog genomes is not quantified but the size of the dog reference panel is less than 10%  
3096 of the size available for human data. Our study and Freedman *et al.* and Wang *et al.* obtained  
3097 Asian vs non-Asian dog divergence time estimates over 20,000 years ago when using the same  
3098 mutation rate ( $4 \times 10^{-9}$ /generation) and generation time (3 years) ([Supplementary Table 16](#)).  
3099 Since the earliest dog fossil remains are dated to be 15,000 years old in Western Eurasia (Europe  
3100 and the Near East), the divergence time between Asian and non-Asian dogs occurring 20,000  
3101 years ago does not support two domestication processes



3102  
3103 In addition, potential genotyping errors due to post-mortem damage may also cause biases when  
3104 utilizing the NGD to estimate a divergence time with Asian dogs, which they find has a slightly  
3105 older divergence compared to using modern European dogs and suggest is evidence of ancestry  
3106 from the remnant European Paleolithic dog population. Fig S26 in Frantz *et al.*<sup>22</sup> notably  
3107 demonstrates that the Tv/Ti heterozygote ratio for NGD is lower than all but one of their  
3108 contemporary canid genomes, suggesting even with base quality recalibration, false positive  
3109 transitions (C>T and G>A) due to post-mortem damage may still be prominent in the inferred  
3110 sequence for the NGD, which would likely lead to increased divergence times by artificially  
3111 elongating the branch lengths for NGD.

### 3112 Comparison to Frantz *et al.* 2016 ADMIXTUREGRAPH analysis

3113 Frantz *et al.*<sup>22</sup> recently fit an admixture model that did not explicitly model Southeast Asian  
3114 gene flow into NGD, but instead modelled a) wolf and ancestral East Asian dog admixture (Fig.  
3115 S14 of their paper) and b) an additional admixture event from East Asian dogs into modern  
3116 European dogs (Fig S24 of their paper). However, we failed to replicate the fit of either of these  
3117 models for NGD, using various European and Chinese wolves to represent the “Wolf”  
3118 population in Frantz *et al.*<sup>22</sup>. We obtained 28-31 outliers with *Z* scores as high as ~46. Frantz *et*  
3119 *al.*<sup>22</sup> utilized Russian wolves, which based on Fan *et al.*<sup>27</sup> have a common ancestry with Asian  
3120 wolves, such as our Chinese wolf. Since our results are consistent with various other analyses  
3121 (Admixture, NGSadmixon, MixMapper, PCA), we speculate that the result of Frantz *et*  
3122 *al.* may be due to their unusual SNP ascertainment.  
3123

3124

3125

3126

3127

## 3128 **Supplementary References**

- 3129 1. Boulestin, B. & Coupey, A.-S. *Cannibalism in the Linear Pottery Culture: The Human*  
3130 *Remains from Herxheim*. (Archaeopress Publishing LTD, 2015).
- 3131 2. Arbogast, R.-M. *et al.* Du loup au „chien des tourbières “. Les restes de canidés sur les  
3132 sites lacustres entre Alpes et Jura. *Revue de Paléobiologie* **10**, 171–183 (2005).
- 3133 3. Seregély, T., Burgdorf, P., Gresik, G., Müller, M. S. & Wilk, A. „Tote Menschen und Tiere in  
3134 finsternen Felsschächten ...“ -neue Dokumentationsmethodik und erste  
3135 Untersuchungsergebnisse zur Kirschbaumhöhle in Oberfranken. *Praehistorische Zeitschrift*  
3136 **90**,
- 3137 4. Studer, T. Die prähistorischen Hunde in ihrer Beziehung zu den gegenwärtig lebenden  
3138 Rassen. (1901).
- 3139 5. Schibler, J. *Ökonomie und Ökologie neolithischer und bronzezeitlicher Ufersiedlungen am*  
3140 *Zürichsee: Ergebnisse der Ausgrabungen Mozartstrasse, Kanalisationssanierung Seefeld,*  
3141 *AKAD/Pressehaus und Mythenschloss in Zürich*. **20**, (Direktion der Öffentlichen Bauten  
3142 des Kantons Zürich, Hochbauamt, Abt. Kantonsarchäologie, 1997).
- 3143 6. Yang, D. Y., Eng, B., Wayne, J. S., Dudar, J. C. & Saunders, S. R. Technical note: improved  
3144 DNA extraction from ancient bones using silica-based spin columns. *Am. J. Phys.*  
3145 *Anthropol.* **105**, 539–543 (1998).
- 3146 7. MacHugh, D. E., Edwards, C. J., Bailey, J. F., Bancroft, D. R. & Bradley, D. G. The  
3147 extraction and analysis of ancient DNA from bone and teeth: a survey of current  
3148 methodologies. *Anc. Biomol.* **3**, 81–102 (2000).
- 3149 8. Meyer, M. & Kircher, M. Illumina sequencing library preparation for highly multiplexed  
3150 target capture and sequencing. *Cold Spring Harb. Protoc.* **2010**, db.prot5448 (2010).
- 3151 9. Gamba, C. *et al.* Genome flux and stasis in a five millennium transect of European  
3152 prehistory. *Nat. Commun.* **5**, 5257 (2014).

- 3153 10. Martin, M. Cutadapt removes adapter sequences from high-throughput sequencing reads.  
3154 *EMBnet.journal* **17**, 10–12 (2011).
- 3155 11. Langmead, B. & Salzberg, S. L. Fast gapped-read alignment with Bowtie 2. *Nat. Methods*  
3156 **9**, 357–359 (2012).
- 3157 12. Li, H. & Durbin, R. Fast and accurate short read alignment with Burrows-Wheeler  
3158 transform. *Bioinformatics* **25**, 1754–1760 (2009).
- 3159 13. Bramanti, B. *et al.* Genetic discontinuity between local hunter-gatherers and central  
3160 Europe's first farmers. *Science* **326**, 137–140 (2009).
- 3161 14. Scheu, A. *et al.* The genetic prehistory of domesticated cattle from their origin to the spread  
3162 across Europe. *BMC Genet.* **16**, 54 (2015).
- 3163 15. Hofmanová, Z. *et al.* Early farmers from across Europe directly descended from Neolithic  
3164 Aegeans. *Proc. Natl. Acad. Sci. U. S. A.* (2016). doi:10.1073/pnas.1523951113
- 3165 16. Kircher, M., Sawyer, S. & Meyer, M. Double indexing overcomes inaccuracies in multiplex  
3166 sequencing on the Illumina platform. *Nucleic Acids Res.* **40**, e3 (2012).
- 3167 17. Kircher, M. Analysis of high-throughput ancient DNA sequencing data. *Methods Mol. Biol.*  
3168 **840**, 197–228 (2012).
- 3169 18. Lassmann, T., Hayashizaki, Y. & Daub, C. O. TagDust—a program to eliminate artifacts  
3170 from next generation sequencing data. *Bioinformatics* **25**, 2839–2840 (2009).
- 3171 19. McKenna, A. *et al.* The Genome Analysis Toolkit: a MapReduce framework for analyzing  
3172 next-generation DNA sequencing data. *Genome Res.* **20**, 1297–1303 (2010).
- 3173 20. Ginolhac, A., Rasmussen, M., Gilbert, M. T. P., Willerslev, E. & Orlando, L. mapDamage:  
3174 testing for damage patterns in ancient DNA sequences. *Bioinformatics* **27**, 2153–2155  
3175 (2011).
- 3176 21. Briggs, A. W. *et al.* Patterns of damage in genomic DNA sequences from a Neandertal.  
3177 *Proc. Natl. Acad. Sci. U. S. A.* **104**, 14616–14621 (2007).
- 3178 22. Frantz, L. A. F. *et al.* Genomic and archaeological evidence suggest a dual origin of

- 3179 domestic dogs. *Science* **352**, 1228–1231 (2016).
- 3180 23. Auton, A. *et al.* Genetic recombination is targeted towards gene promoter regions in dogs.  
3181 *PLoS Genet.* **9**, e1003984 (2013).
- 3182 24. De Decker, S. *et al.* Tethered cord syndrome associated with a thickened filum terminale in  
3183 a dog. *J. Vet. Intern. Med.* **29**, 405–409 (2015).
- 3184 25. Freedman, A. H. *et al.* Genome sequencing highlights the dynamic early history of dogs.  
3185 *PLoS Genet.* **10**, e1004016 (2014).
- 3186 26. Schoenebeck, J. J. *et al.* Variation of BMP3 contributes to dog breed skull diversity. *PLoS*  
3187 *Genet.* **8**, e1002849 (2012).
- 3188 27. Fan, Z. *et al.* Worldwide patterns of genomic variation and admixture in gray wolves.  
3189 *Genome Res.* **26**, 163–173 (2016).
- 3190 28. Decker, B. *et al.* Comparison against 186 canid whole-genome sequences reveals survival  
3191 strategies of an ancient clonally transmissible canine tumor. *Genome Res.* **25**, 1646–1655  
3192 (2015).
- 3193 29. Li, G. *et al.* Comparative analysis of mammalian Y chromosomes illuminates ancestral  
3194 structure and lineage-specific evolution. *Genome Res.* **23**, 1486–1495 (2013).
- 3195 30. Anderson, T. M. *et al.* Molecular and evolutionary history of melanism in North American  
3196 gray wolves. *Science* **323**, 1339–1343 (2009).
- 3197 31. Shannon, L. M. *et al.* Genetic structure in village dogs reveals a Central Asian  
3198 domestication origin. *Proc. Natl. Acad. Sci. U. S. A.* **112**, 13639–13644 (2015).
- 3199 32. Pilot, M. *et al.* On the origin of mongrels: evolutionary history of free-breeding dogs in  
3200 Eurasia. *Proc. Biol. Sci.* **282**, 20152189 (2015).
- 3201 33. Thalmann, O. *et al.* Complete mitochondrial genomes of ancient canids suggest a  
3202 European origin of domestic dogs. *Science* **342**, 871–874 (2013).
- 3203 34. Tamura, K., Stecher, G., Peterson, D., Filipowski, A. & Kumar, S. MEGA6: Molecular  
3204 Evolutionary Genetics Analysis version 6.0. *Mol. Biol. Evol.* **30**, 2725–2729 (2013).

- 3205 35. Duleba, A., Skonieczna, K., Bogdanowicz, W., Malyarchuk, B. & Grzybowski, T. Complete  
3206 mitochondrial genome database and standardized classification system for *Canis lupus*  
3207 *familiaris*. *Forensic Sci. Int. Genet.* **19**, 123–129 (2015).
- 3208 36. Gronau, I., Hubisz, M. J., Gulko, B., Danko, C. G. & Siepel, A. Bayesian inference of  
3209 ancient human demography from individual genome sequences. *Nat. Genet.* **43**, 1031–  
3210 1034 (2011).
- 3211 37. Junier, T. & Zdobnov, E. M. The Newick utilities: high-throughput phylogenetic tree  
3212 processing in the UNIX shell. *Bioinformatics* **26**, 1669–1670 (2010).
- 3213 38. Wang, G.-D. *et al.* Out of southern East Asia: the natural history of domestic dogs across  
3214 the world. *Cell Res.* **26**, 21–33 (2016).
- 3215 39. Patterson, N., Price, A. L. & Reich, D. Population structure and eigenanalysis. *PLoS Genet.*  
3216 **2**, e190 (2006).
- 3217 40. Purcell, S. *et al.* PLINK: a tool set for whole-genome association and population-based  
3218 linkage analyses. *Am. J. Hum. Genet.* **81**, 559–575 (2007).
- 3219 41. Bradburd, G., Ralph, P. L. & Coop, G. *A Spatial Framework for Understanding Population*  
3220 *Structure and Admixture*. (2015). doi:10.1101/013474
- 3221 42. Alexander, D. H., Novembre, J. & Lange, K. Fast model-based estimation of ancestry in  
3222 unrelated individuals. *Genome Res.* **19**, 1655–1664 (2009).
- 3223 43. Skotte, L., Korneliussen, T. S. & Albrechtsen, A. Estimating individual admixture  
3224 proportions from next generation sequencing data. *Genetics* **195**, 693–702 (2013).
- 3225 44. Patterson, N. *et al.* Ancient admixture in human history. *Genetics* **192**, 1065–1093 (2012).
- 3226 45. Lipson, M. *et al.* Efficient moment-based inference of admixture parameters and sources of  
3227 gene flow. *Mol. Biol. Evol.* **30**, 1788–1802 (2013).
- 3228 46. Fu, Q. *et al.* The genetic history of Ice Age Europe. *Nature* **534**, 200–205 (2016).
- 3229 47. Rambaut, A., Suchard, M. A., Xie, D. & Drummond, A. J. Tracer v1. 6. (2014).
- 3230 48. Hudson, R. R. & Others. Gene genealogies and the coalescent process. *Oxford surveys in*

- 3231 *evolutionary biology* **7**, 44 (1990).
- 3232 49. Busing, F. M. T. A., Meijer, E. & Van Der Leeden, R. Delete-m Jackknife for Unequal m.  
3233 *Stat. Comput.* **9**, 3–8 (1999).
- 3234 50. Koepfli, K.-P. *et al.* Genome-wide Evidence Reveals that African and Eurasian Golden  
3235 Jackals Are Distinct Species. *Curr. Biol.* **25**, 2158–2165 (2015).
- 3236 51. Skoglund, P., Ersmark, E., Palkopoulou, E. & Dalén, L. Ancient wolf genome reveals an  
3237 early divergence of domestic dog ancestors and admixture into high-latitude breeds. *Curr.*  
3238 *Biol.* **25**, 1515–1519 (2015).
- 3239 52. Axelsson, E. *et al.* The genomic signature of dog domestication reveals adaptation to a  
3240 starch-rich diet. *Nature* **495**, 360–364 (2013).
- 3241 53. Price, A. L. *et al.* Principal components analysis corrects for stratification in genome-wide  
3242 association studies. *Nat. Genet.* **38**, 904–909 (2006).
- 3243 54. Pavlidis, P. & Noble, W. S. Matrix2png: a utility for visualizing matrix data. *Bioinformatics*  
3244 **19**, 295–296 (2003).
- 3245 55. Alkan, C. *et al.* Personalized copy number and segmental duplication maps using next-  
3246 generation sequencing. *Nat. Genet.* **41**, 1061–1067 (2009).
- 3247 56. Sudmant, P. H. *et al.* Diversity of human copy number variation and multicopy genes.  
3248 *Science* **330**, 641–646 (2010).
- 3249 57. Hach, F. *et al.* mrsFAST: a cache-oblivious algorithm for short-read mapping. *Nat. Methods*  
3250 **7**, 576–577 (2010).
- 3251 58. Benson, G. Tandem repeats finder: a program to analyze DNA sequences. *Nucleic Acids*  
3252 *Res.* **27**, 573–580 (1999).
- 3253 59. Nicholas, T. J. *et al.* The genomic architecture of segmental duplications and associated  
3254 copy number variants in dogs. *Genome Res.* **19**, 491–499 (2009).
- 3255 60. Nicholas, T. J., Baker, C., Eichler, E. E. & Akey, J. M. A high-resolution integrated map of  
3256 copy number polymorphisms within and between breeds of the modern domesticated dog.

- 3257 *BMC Genomics* **12**, 414 (2011).
- 3258 61. Chen, W.-K., Swartz, J. D., Rush, L. J. & Alvarez, C. E. Mapping DNA structural variation in  
3259 dogs. *Genome Res.* **19**, 500–509 (2009).
- 3260 62. Boyko, A. R. *et al.* Complex population structure in African village dogs and its implications  
3261 for inferring dog domestication history. *Proc. Natl. Acad. Sci. U. S. A.* **106**, 13903–13908  
3262 (2009).
- 3263 63. Cagan, A. & Blass, T. Identification of genomic variants putatively targeted by selection  
3264 during dog domestication. *BMC Evol. Biol.* **16**, 10 (2016).
- 3265 64. Arendt, M., Fall, T., Lindblad-Toh, K. & Axelsson, E. Amylase activity is associated with  
3266 AMY2B copy numbers in dog: implications for dog domestication, diet and diabetes. *Anim.*  
3267 *Genet.* **45**, 716–722 (2014).
- 3268 65. Browning, B. L. & Browning, S. R. Improving the accuracy and efficiency of identity-by-  
3269 descent detection in population data. *Genetics* **194**, 459–471 (2013).
- 3270 66. Song, S., Sliwerska, E., Emery, S. & Kidd, J. M. Modeling human population separation  
3271 history using physically phased genomes. *Genetics* **205**, 385–395 (2017).
